# Supplementary material for: Oxygen bridged neutral annulenes: a novel class of materials for organic field-effect transistors
Source: Royal Society of Chemistry journal article supplement (doi:10.1039/c1cc16344b), 2011-10-20
Supplement: c1cc16344b.pdf [file c1cc16344b.pdf]

## Supporting Information

# Oxygen Bridged Neutral Annulenes: A Novel Class of Materials for Organic Field-Effect Transistors

*Kamaljit Singh,\* Tarunpreet Singh Virk, Jing Zhang, Wei Xu and Daoben Zhu\**

### Table of Contents

|                                                                         |            |
|-------------------------------------------------------------------------|------------|
| <b>General Information</b>                                              | <b>S1</b>  |
| <b>Experimental Section</b>                                             | <b>S2</b>  |
| <b>Copies of <sup>1</sup>H, <sup>13</sup>C NMR, IR and Mass Spectra</b> | <b>S5</b>  |
| <b>Theoretical Calculations</b>                                         | <b>S29</b> |
| <b>UV-Visible Spectra</b>                                               | <b>S53</b> |
| <b>Cyclic Voltamograms and TGA graphs</b>                               | <b>S56</b> |
| <b>X-Rays</b>                                                           | <b>S58</b> |
| <b>Experimental details for OFET Device fabrication</b>                 | <b>S61</b> |

**Cif files of 12a and 12b**

## General Information

$^1\text{H}$  (400 MHz),  $^{13}\text{C}$  (100 MHz) NMR spectra were recorded on a BRUKER AVANCE II 400 NMR Spectrometer and UNITY INOVA-400MHz NMR Spectrometer. Tetramethylsilane (TMS) served as the internal standard (0 ppm for  $^1\text{H}$  and 77.0 ppm for  $^{13}\text{C}$ ) and  $\text{CDCl}_3$  was used as solvent. The following abbreviations were used to express the multiplicities: s = singlet; d = doublet; t = triplet; q = quartet; m = multiplet; br = broad. Data are reported as follows: chemical shifts in ppm ( $\delta$ ), integration, coupling constant J (Hz) and assignment. Mass spectra were recorded on Bruker Daltonics esquire3000\_00037 mass spectrometer and an UPLC-Q-TOF instrument, having SYNAPT mass spectrometer and ACQUITY high performance liquid chromatography (WATERS) with a TDA detector. Elemental analyses were performed with a Thermoelectron FLASH EA1112 CHNS analyzer and were within  $\pm 0.4\%$  of the theoretical values. IR spectrum was recorded on VARIAN 660-IR Fourier-Transform Spectrophotometer in range 400-4000  $\text{cm}^{-1}$  using KBr as medium. UV-Vis spectra were recorded on a SHIMADZU 1601 PC spectrophotometer, with a quartz cuvette (path length, 1 cm) and studies were performed in AR grade DCM. TGA were performed on a SDT Q600 TA instrument with a temp. rise of  $10^\circ\text{C}/\text{minute}$  under nitrogen atmosphere. Electrochemical studies were carried out on CHI 660C Electrochemical Workstation with a conventional three-electrode configuration consisting of platinum working electrode (2 mm diameter), counter electrode and Ag/AgCl as reference electrode. The experiments were carried out on  $10^{-4}\text{M}$  solutions of samples in DCM containing 0.1 M tetrabutylammonium hexafluorophosphate ( $\text{TBAPF}_6$ ) as supporting electrolyte at room temperature. Deoxygenation of the solutions was achieved by bubbling nitrogen for 30 min and the working electrode was cleaned after each run. The cyclic voltammograms were recorded with a scan rate of  $100\text{ mVs}^{-1}$ . All reactions were monitored by thin-layer chromatography carried out on Merck pre-coated TLC plates (silica gel 60 F<sub>254</sub>, 0.25 mm), visualization by using UV (254 nm). Melting points were determined in open capillaries and are uncorrected. Reactions that required anhydrous conditions were carried out under the blanket of deoxygenated (BASF catalyst) anhydrous nitrogen gas in oven/flame dried glassware. The products were purified by flash column chromatography on silica gel 60-120 mesh. All reagents and chemicals were purchased from Sigma-Aldrich. DMF, 1,2-DCE,  $\text{TiCl}_4$ , Pyridine and DCM were purchased locally, dried and distilled prior to use.  $\text{POCl}_3$  was distilled at constant b.p. prior to use. THF and toluene were distilled from sodium/benzophenone (benzophenone ketyl). Anhydrous DCM was stored over fused  $\text{CaCl}_2$  and distilled before use. Zinc dust was activated prior to use using standard (2M HCl and subsequent water washing) methods. DDQ and hydrazine hydrate were purchased from Sigma-Aldrich, and were used as received. All theoretical studies were performed with a GAUSSIAN 09 software package. *Meso*-substituted bisfuran-2-yl methanes were prepared according to literature procedure,<sup>[1]</sup> but by taking the corresponding new aldehydes.

---

[1] Tanaka, S.; Tomokuni, H.; J. Heterocyclic Chem., 1991, 28, 991-994.

## Experimental Section

The *meso*-phenyl and *meso-p*-tolyl substituted bisfuran-2-ylmethane derivatives (**9**)s were synthesized according to the literature procedure<sup>1</sup>.

### General procedure for the synthesis of the dialdehydes **10a** and **10b**

POCl<sub>3</sub> (4.9 g, 32 mmol) was added slowly to N,N'-dimethylformamide (2.6g, 35.6 mmol) maintained below 20°C. To this solution, *meso*-phenyl-2,2'-difurylmethane **9a** (3g, 13.4 mmol) in dry ethylene dichloride (30 ml) was added with stirring over 20 minutes, maintaining the temperature below 20°C. The mixture was left at r.t. for 3 hours, refluxed for 1 hour, cooled and added to a solution of sodium acetate (81 g) in water (120 ml). The mixture was refluxed for 15 minutes, cooled and extracted thoroughly with ethyl acetate. The combined ethyl acetate layers were washed with saturated aqueous sodium bicarbonate solution and then with water. The extract was dried over anhydrous sodium sulfate. The concentrated solution was then chromatographed on silica and the dialdehyde **10a** was isolated as thick red oil (1.6g, 43%). Dialdehyde **10b** was analogously prepared (42%) from *meso-p*-tolyl-2,2'-difurylmethane **9b**.

The characteristic data for **9a**, **9b**, **10a** and **10b** is presented below.

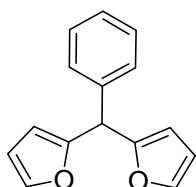

### Phenyl-di(furan-2-yl)methane, **9a**

(Yield = 15%), <sup>1</sup>H NMR (400 MHz, CDCl<sub>3</sub>): δ (ppm) 7.29-7.35 (4H, m), 7.21-7.27 (3H, m), 6.30-6.31 (2H, m), 6.01-6.02 (2H, m), 5.44 (1H, s); <sup>13</sup>C NMR (100 MHz, CDCl<sub>3</sub>): δ (ppm) 154.4, 142.0, 139.4, 128.6, 128.4, 127.2, 110.3, 107.6, 45.0; Anal. Calcd. (%) for C<sub>15</sub>H<sub>12</sub>O<sub>2</sub>: C, 80.35; H, 5.35; Found: C, 80.52; H, 5.42; *m/z* 247 (M<sup>+</sup> + 23).

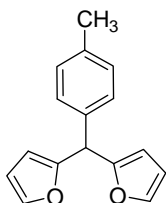

### *p*-Tolyl-di(furan-2-yl)methane, **9b**

(Yield = 16%), <sup>1</sup>H NMR (400 MHz, CDCl<sub>3</sub>): δ (ppm) 7.31-7.32 (2H, m), 7.08-7.13 (4H, m), 6.26-6.27 (2H, m), 5.99-6.00 (2H, m), 5.40 (1H, s), 2.29 (3H, s); <sup>13</sup>C NMR (100 MHz, CDCl<sub>3</sub>): δ (ppm) 154.7, 142.0, 136.9, 129.4, 128.3, 110.4, 107.5, 44.8, 21.2; Anal. Calcd. (%) for C<sub>16</sub>H<sub>14</sub>O<sub>2</sub>: C, 80.67; H, 5.88; Found: C, 81.02; H, 6.11; *m/z* 262 (M<sup>+</sup> + 23).

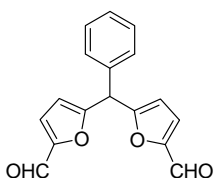

### Phenyl-di(5-formylfuran-2-yl)methane, **10a**

(Yield = 43%), <sup>1</sup>H NMR (400 MHz, CDCl<sub>3</sub>) 9.58 (2H, s), 7.32-7.39 (3H, m), 7.26-7.28 (2H, m), 7.20 (2H, d, J=3.6 Hz), 6.32 (2H, d, J=3.24 Hz), 5.61 (1H, s); <sup>13</sup>C NMR (100 MHz, CDCl<sub>3</sub>) 177.5, 159.2, 152.6, 136.5, 129.1, 128.8, 128.3, 128.2, 122.2, 111.3, 45.5; UPLC-Q-TOF MS 279 (M<sup>+</sup>, 100%).

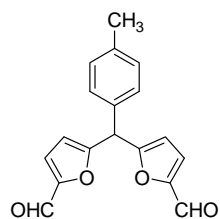

***p*-Tolyl-di(5-formylfuran-2-yl)methane, **10b****

(Yield = 42%),  $^1\text{H}$  NMR (400 MHz,  $\text{CDCl}_3$ ) 9.57 (2H, s), 7.19 (2H, d,  $J=3.64$  Hz), 7.16 (4H, s), 6.31 (2H, d,  $J=3.2$ Hz), 5.56 (1H, s), 2.34 (3H, s);  $^{13}\text{C}$  NMR (100 MHz,  $\text{CDCl}_3$ ) 177.5, 159.5, 152.6, 138, 133.5, 129.7, 128.2, 122.2, 111.2, 45.2, 21.1; UPLC-Q-TOF MS 293 ( $\text{M}^-$ , 100%).

**General procedure for the synthesis of the *meso*-substituted dihydrotetraoxa annulenes **11a** and **11b****

To a stirring suspension of zinc dust (2.4 g, 38 mmol) in 200 ml of THF maintained under nitrogen atmosphere, a solution of 19.6 ml of 1.0 M  $\text{TiCl}_4$  (in  $\text{CH}_2\text{Cl}_2$ ) was added over 20 minutes. The reaction mixture was refluxed for 1 hour, and treated with a solution of dialdehyde **10a** (0.5 g, 1.78 mmol) and pyridine (2.8 g, 35.6 mmol) dissolved in 200 ml of THF. The addition was made using a hypodermic syringe over 40 minutes to the gently refluxing suspension. After refluxing under nitrogen for 18 hours, the reaction was carefully quenched with a solution of aqueous  $\text{K}_2\text{CO}_3$  (10%, 100 ml). The reaction mixture was filtered, and the filtrate was concentrated under reduced pressure and the residue extracted with 300 ml methylene chloride. The extract was washed with water (2 x 50 ml) and dried over anhydrous sodium sulfate. The solvent was evaporated under reduced pressure and the residue was chromatographed (over silica) to isolate the **11a** (67 mg, 15%), m.p.  $>250^\circ\text{C}$ .

Using dialdehyde **10b**, dihydrotetraoxaannulene **11b** was analogously prepared in 13% yield. The characteristic data for **11a** and **11b** is presented below.

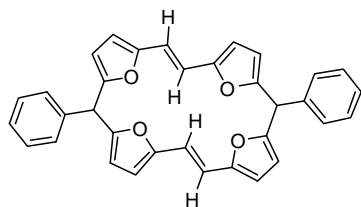

**Meso-Phenyldihydrotetraoxa[22]annulene[2,1,2,1] **11a****, (Yield =15%),  $^1\text{H}$  NMR (400 MHz,  $\text{CDCl}_3$ ) 7.29-7.44 (10H, m), 7.07 (4H, s), 6.21 (4H, d,  $J=3.2$  Hz), 5.97 (4H, d,  $J=3.2$  Hz), 5.32 (2H, s);  $^{13}\text{C}$  NMR (100 MHz,  $\text{CDCl}_3$ ) 153.1, 152.9, 138.3, 128.8, 128.6, 127.5, 116, 109, 106.4, 45; IR (KBr):724, 782, 960, 1014, 1274, 1447, 1500, 1586, 2854, 3021, 3117  $\text{cm}^{-1}$ ; UPLC-Q-TOF MS: 494, 495, 496.

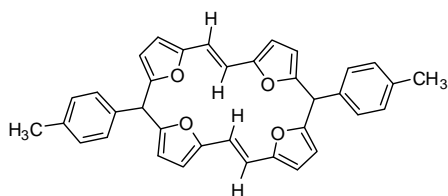

**meso-p-Tolyldihydrotetraoxa[22]annulene[2,1,2,1] **11b****, (Yield = 13%),  $^1\text{H}$  NMR (400 MHz,  $\text{CDCl}_3$ ) 7.27-7.31 (4H, m), 7.15-7.18 (4H, m), 7.05 (4H, d,  $J= 4.04$  Hz), 6.20 (4H, d,  $J= 3.2$  Hz), 6.03 (2H, d,  $J= 3.28$  Hz), 5.96 (2H, d,  $J= 3$  Hz), 5.28 (2H, d,  $J= 4.88$  Hz), 2.36 (6H, s);  $^{13}\text{C}$  NMR (100 MHz,  $\text{CDCl}_3$ ) 153.3, 153.2, 152.9, 152.8, 137.1, 129.3, 128.6, 128.3, 115.9, 108.9, 106.3, 44.6, 44.4, 21.1; IR (KBr):764, 953, 1012, 1275, 1450, 1500, 1571, 2917, 3010, 3100  $\text{cm}^{-1}$ ; UPLC-Q-TOF MS: 522, 523, 524.

**General procedure for the synthesis of the *meso*-substituted tetraoxa[22]annulenes **12a** and **12b**:**

To a solution of **11a** (0.1g, 0.2 mmol) in 5 ml toluene, was added under nitrogen with stirring, a solution of DDQ (0.114 g, 0.5 mmol) in 5 ml toluene. Shortly after mixing the two solutions, purple precipitates formed and the reaction mixture was stirred for additional 3 h. The purple precipitates were filtered and added to 3 ml of hydrazine hydrate (98%). After boiling for 10 minutes, the solid was filtered, washed with water, and dried. The resulting product was dissolved in methylene chloride and chromatographed on silica (DCM). Evaporation of the purple solution gave 0.06 g (60%) of shining metallic purple **12a** (m.pt. >280 °C).

Using the same procedure, **11b** was oxidized to corresponding **12b** in 42% yield. The characteristic data for **12a** and **12b** is presented below.

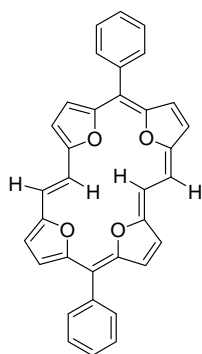

**meso-Phenyltetraoxa[22]annulene[2,1,2,1] 12a**, (Yield = 60%),  $^1\text{H NMR}$  (400 MHz,  $\text{CDCl}_3$ ) 10.47 (2H, d,  $J = 14.84$  Hz), 9.72 (2H, d,  $J = 4.32$  Hz), 9.12 (2H, d,  $J = 4.28$  Hz), 9.09 (2H, d,  $J = 4.24$  Hz), 9.01 (2H, d,  $J = 4.24$  Hz), 8.39 (4H, d,  $J = 6.88$  Hz), 7.84 (4H, t,  $J = 7.5$  Hz), 7.75 (2H, t,  $J = 7.52$  Hz), -5.42 (2H, d,  $J = 14.88$  Hz); IR (KBr): 779, 1175, 1299, 1654, 3100  $\text{cm}^{-1}$ ; Anal. Calcd. (%) for  $\text{C}_{34}\text{H}_{22}\text{O}_4$ : C, 82.59; H, 4.45; Found: C, 82.29; H, 4.26; UPLC-Q-TOF MS: 494 (100%).

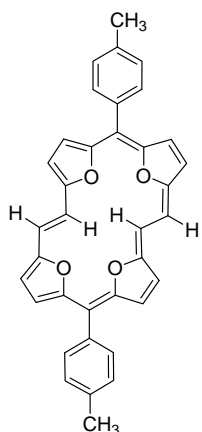

**Meso-p-Tolyltetraoxa[22]annulene[2,1,2,1] 12b**, (Yield = 42%),  $^1\text{H NMR}$  (400 MHz,  $\text{CDCl}_3$ ) 10.45 (2H, d,  $J = 15.0$  Hz), 9.67 (2H, d,  $J = 5.0$  Hz), 9.10 (4H, m), 8.98 (2H, d,  $J = 5.0$  Hz), 8.27 (4H, d,  $J = 6.80$  Hz), 7.64 (4H, d,  $J = 7.2$  Hz), 2.69 (6H, s), -5.40 (2H, d,  $J = 15$  Hz); IR (KBr): 779, 1176, 1301, 1645, 3100  $\text{cm}^{-1}$ ; Anal. Calcd. (%) for  $\text{C}_{36}\text{H}_{26}\text{O}_4$ : C, 82.76; H, 4.98; Found: C, 82.41; H, 4.99; UPLC-Q-TOF MS: 522 (100%).

Copies of  $^1\text{H}$ ,  $^{13}\text{C}$  NMR, IR and Mass Spectra

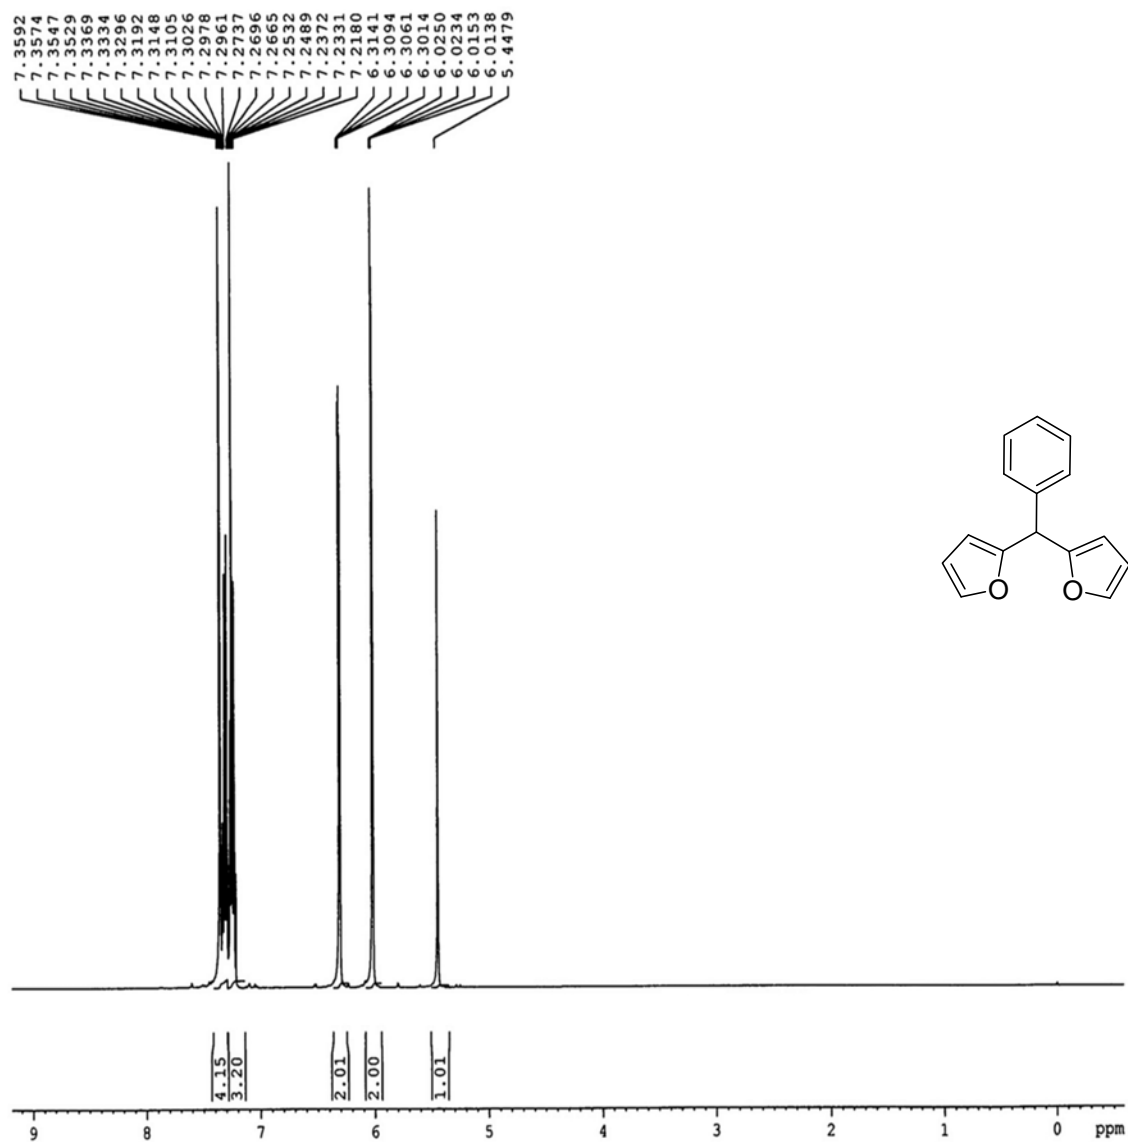

Figure S1 :  $^1\text{H}$  NMR spectrum of 9a.

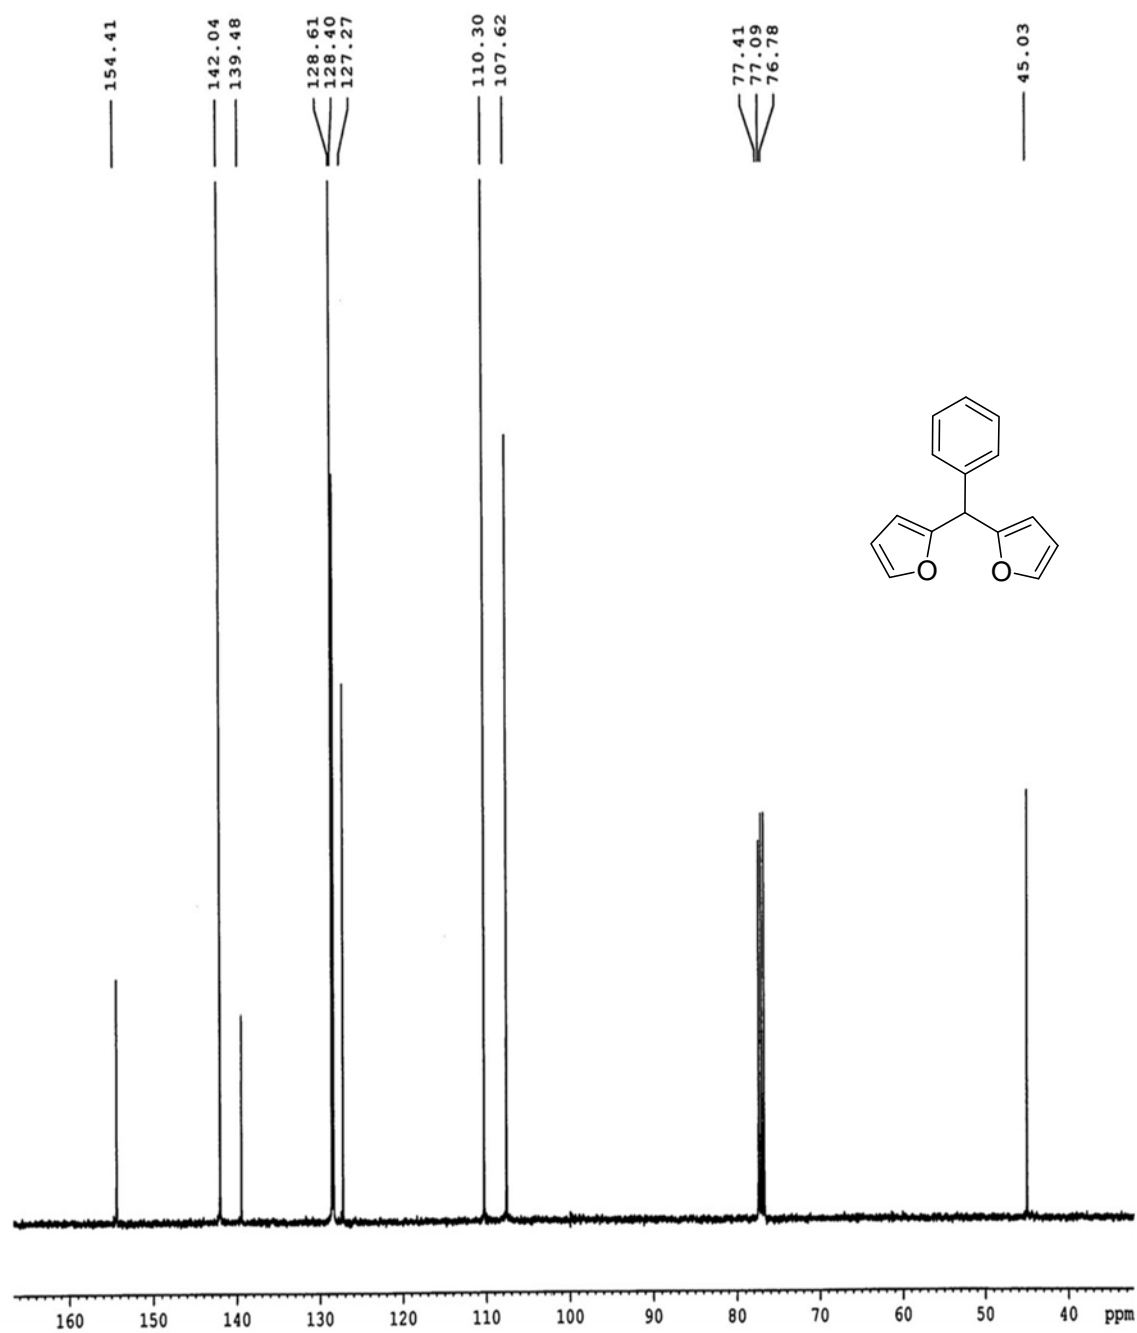

Figure S2:  $^{13}\text{C}$  NMR spectrum of **9a**.

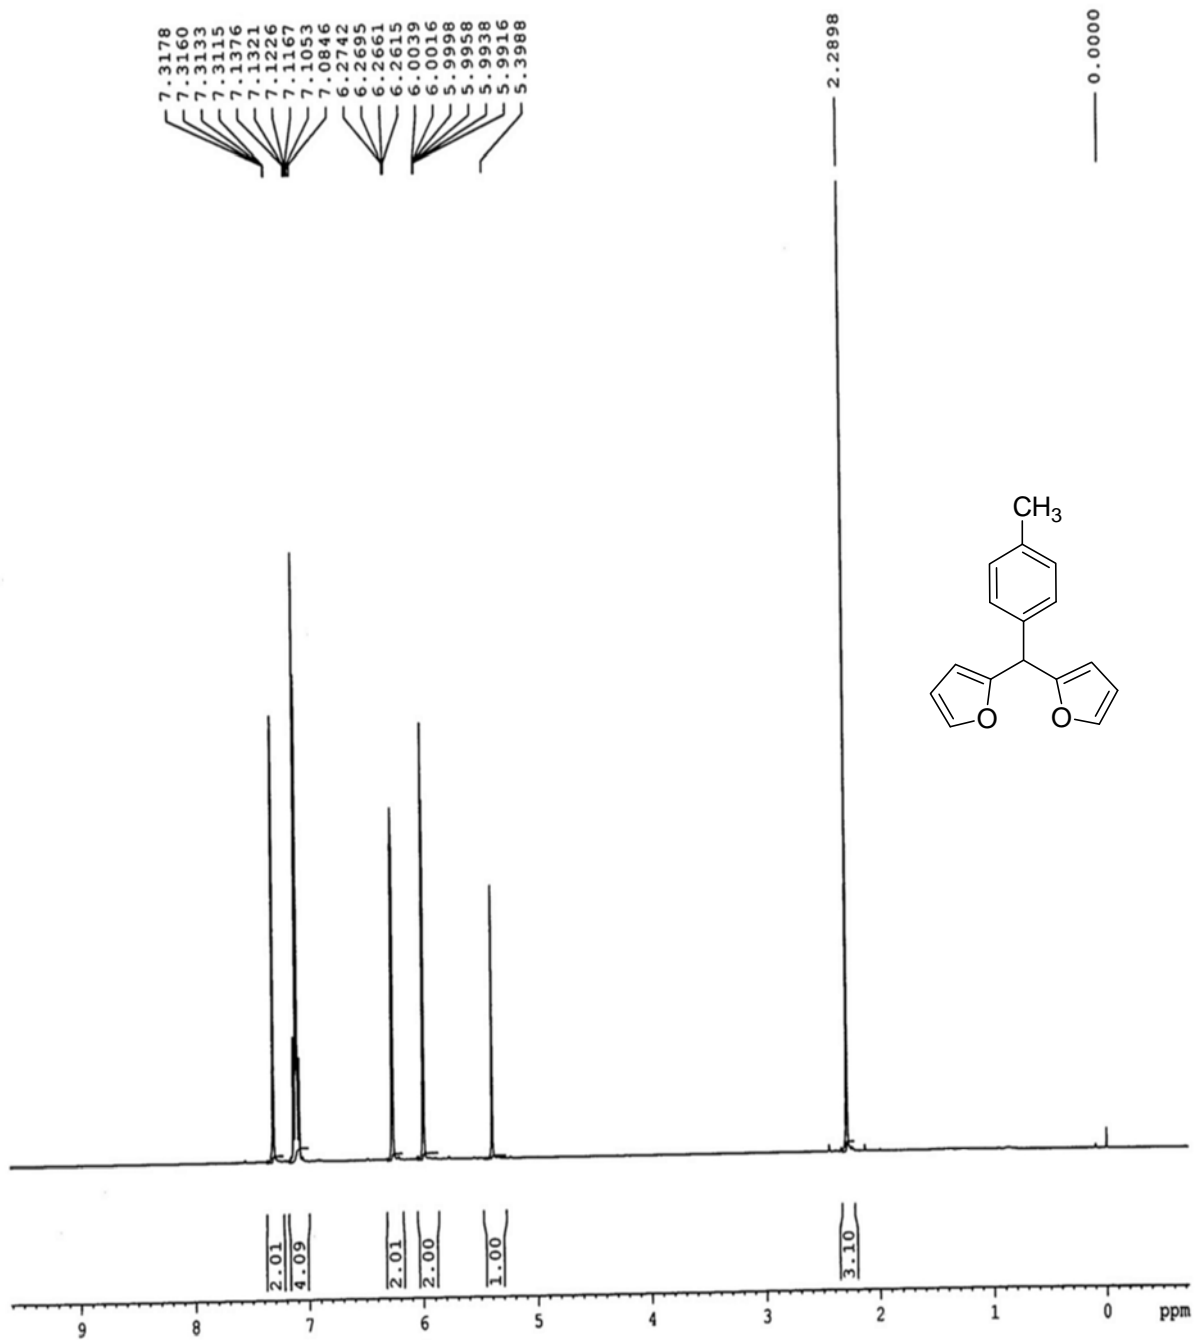

Figure S3:  $^1\text{H}$  NMR spectrum of **9b**.



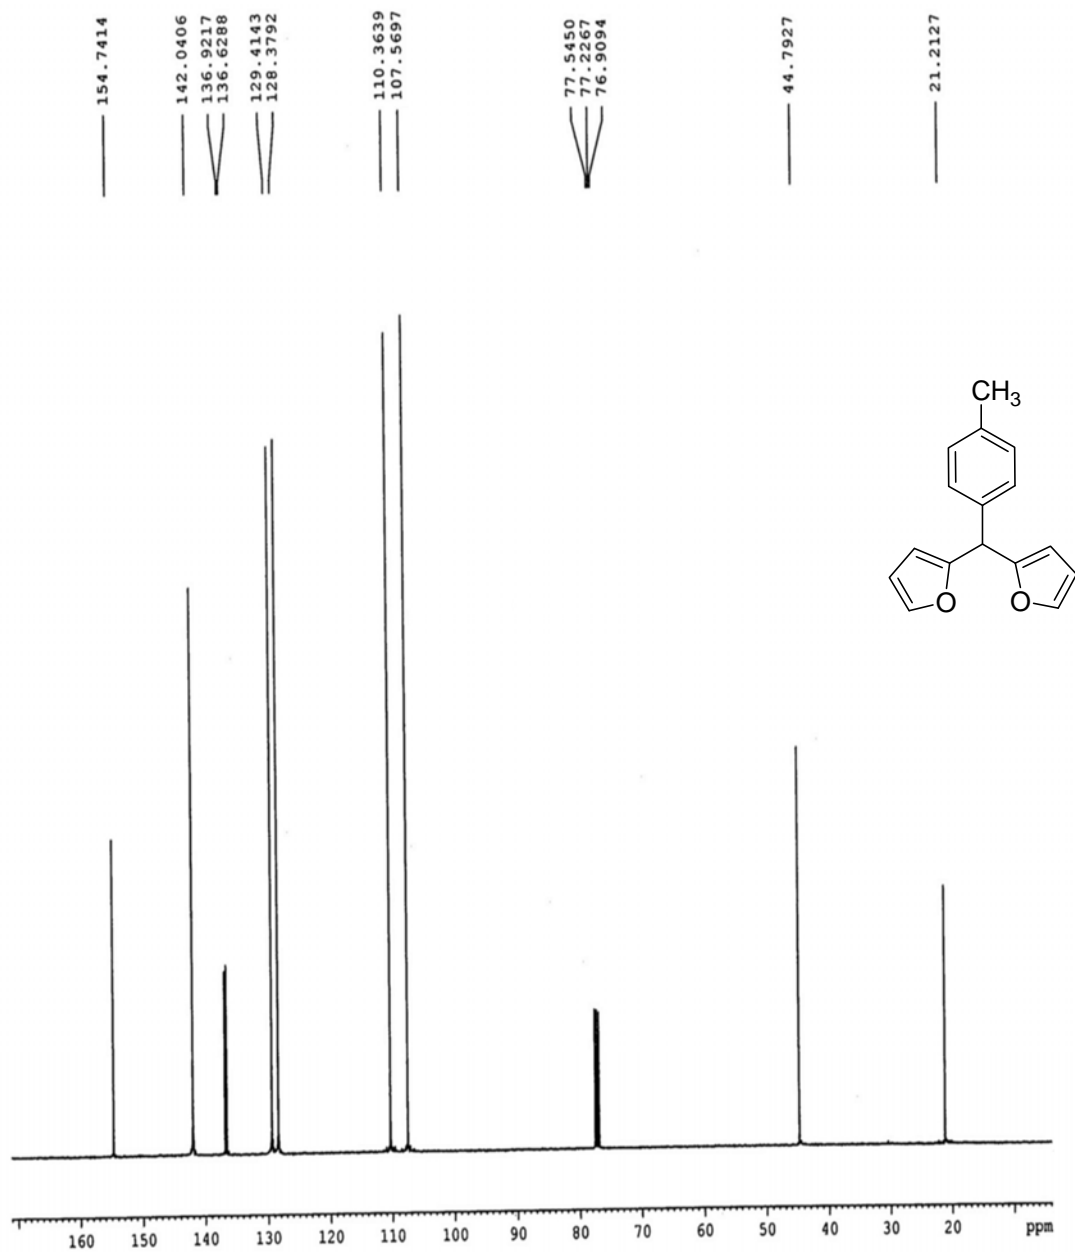

Figure S4:  $^{13}\text{C}$  NMR spectrum of **9b**.

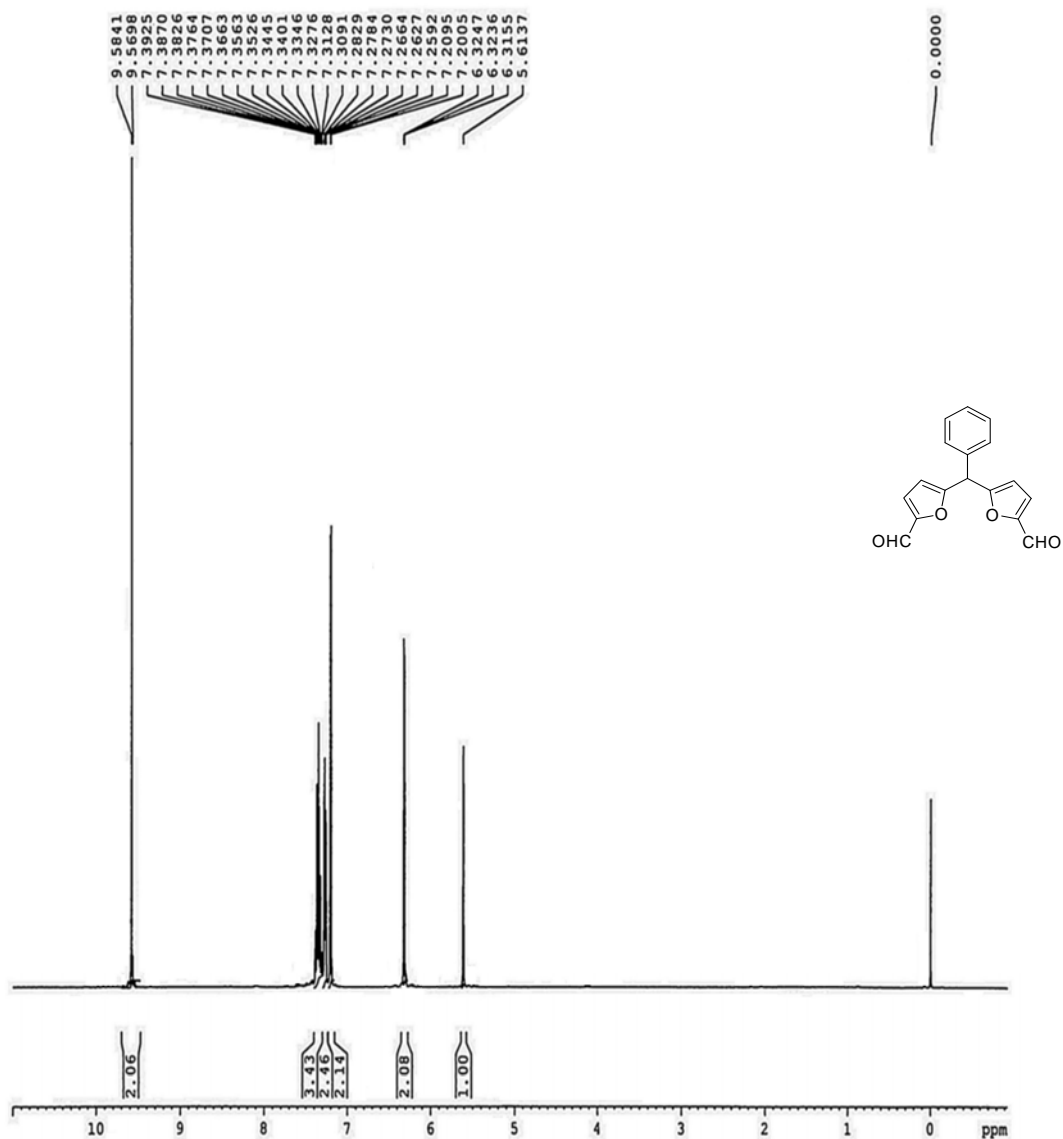

Figure S5 :  $^1\text{H}$  NMR spectrum of **10a**.

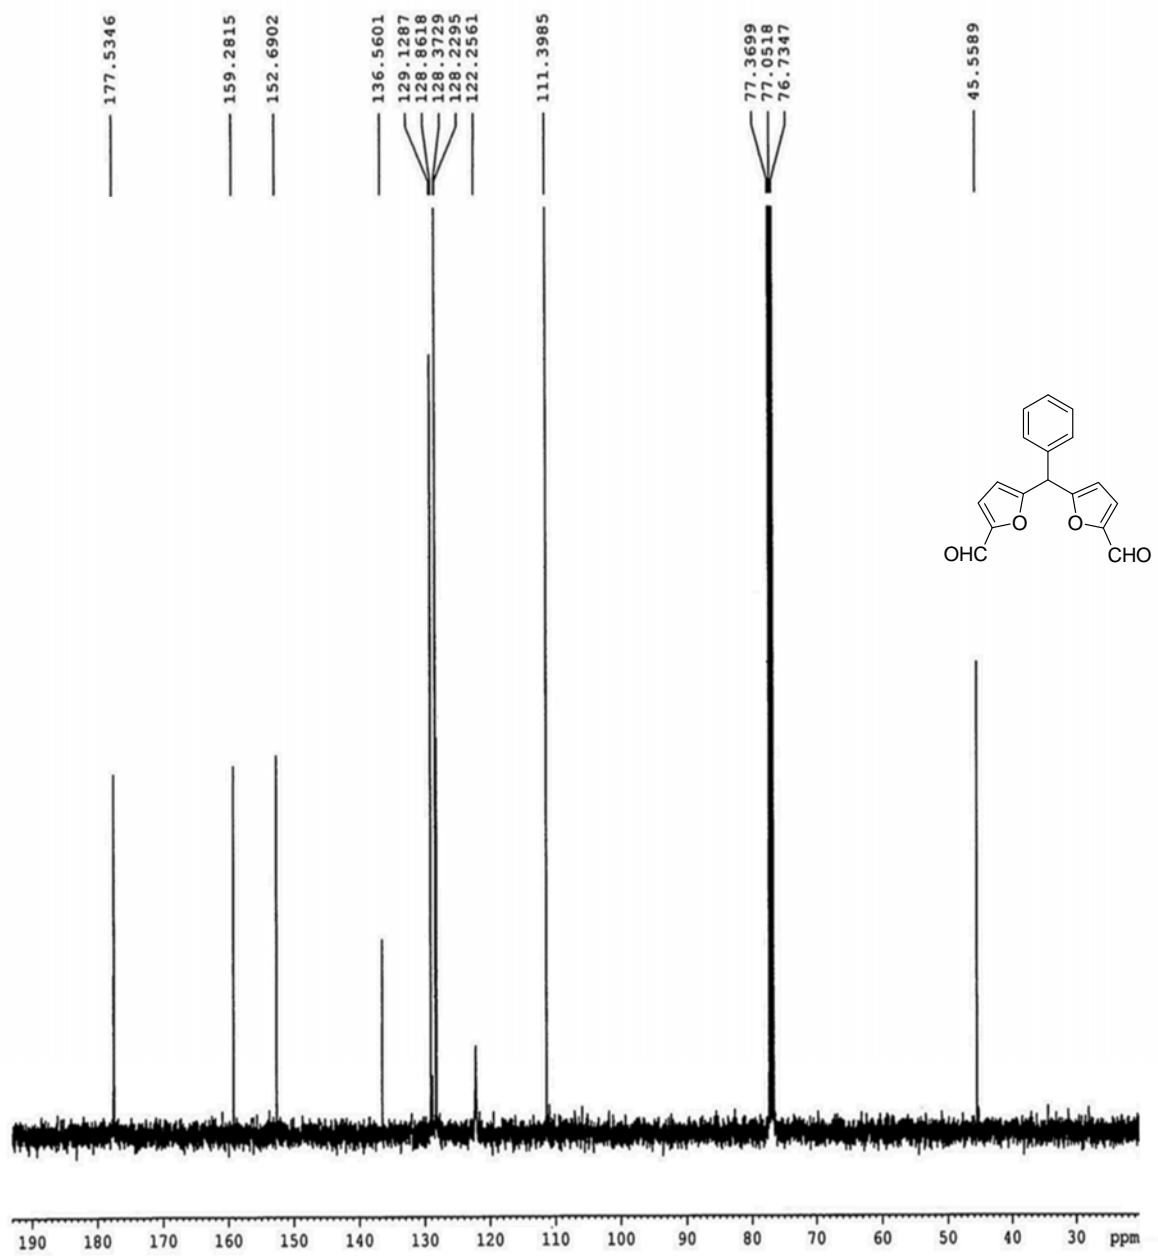

Figure S6:  $^{13}\text{C}$  NMR spectrum of **10a**.

MS ES+

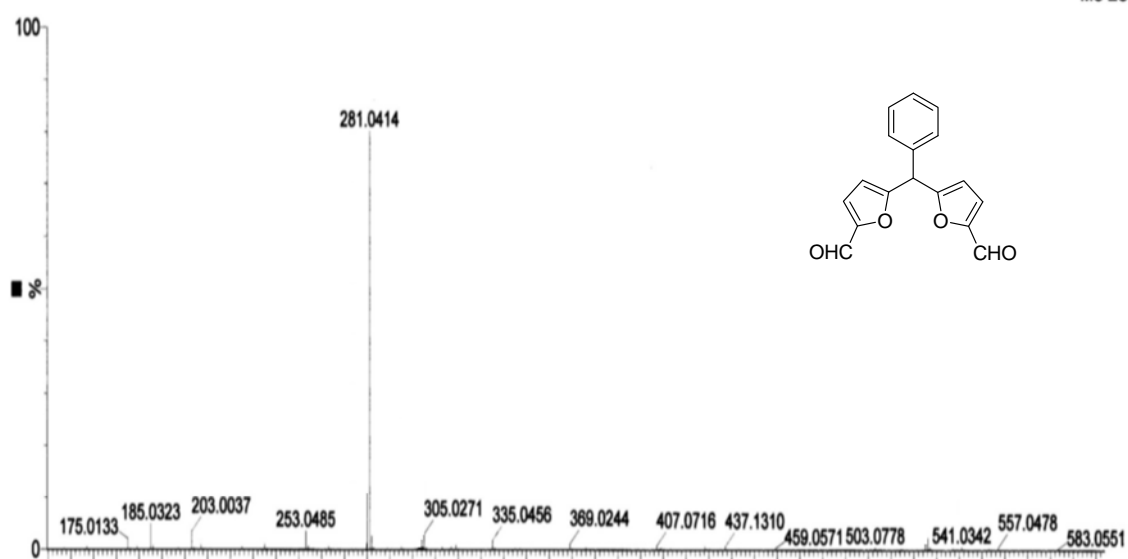

MS0021 20 (1.343) Cm (19:23)

MS ES-

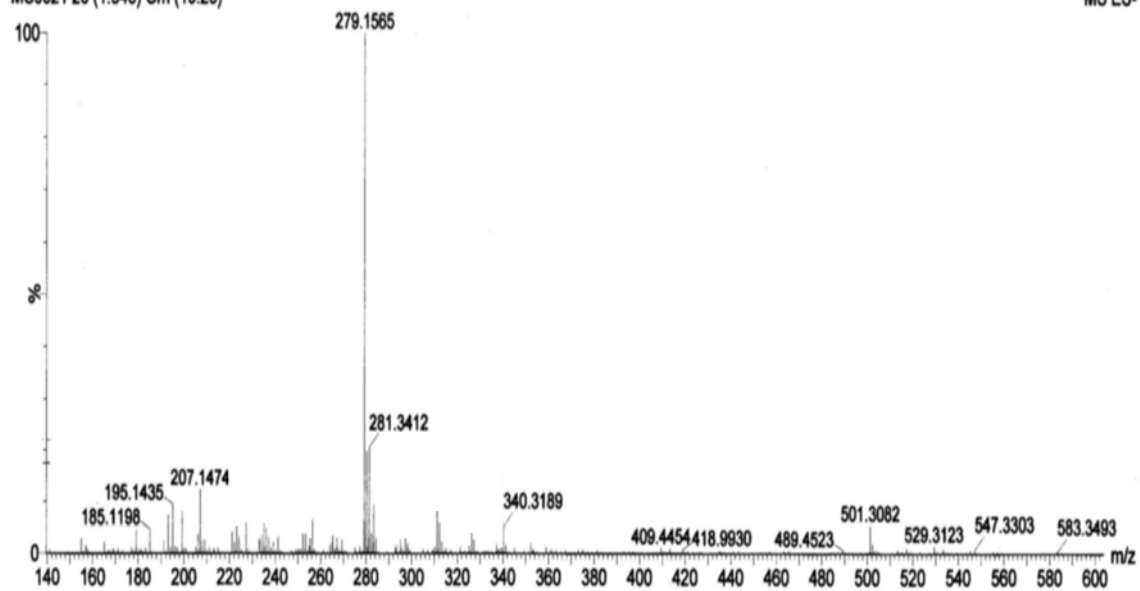

Figure S7: Mass spectrum of 10a.

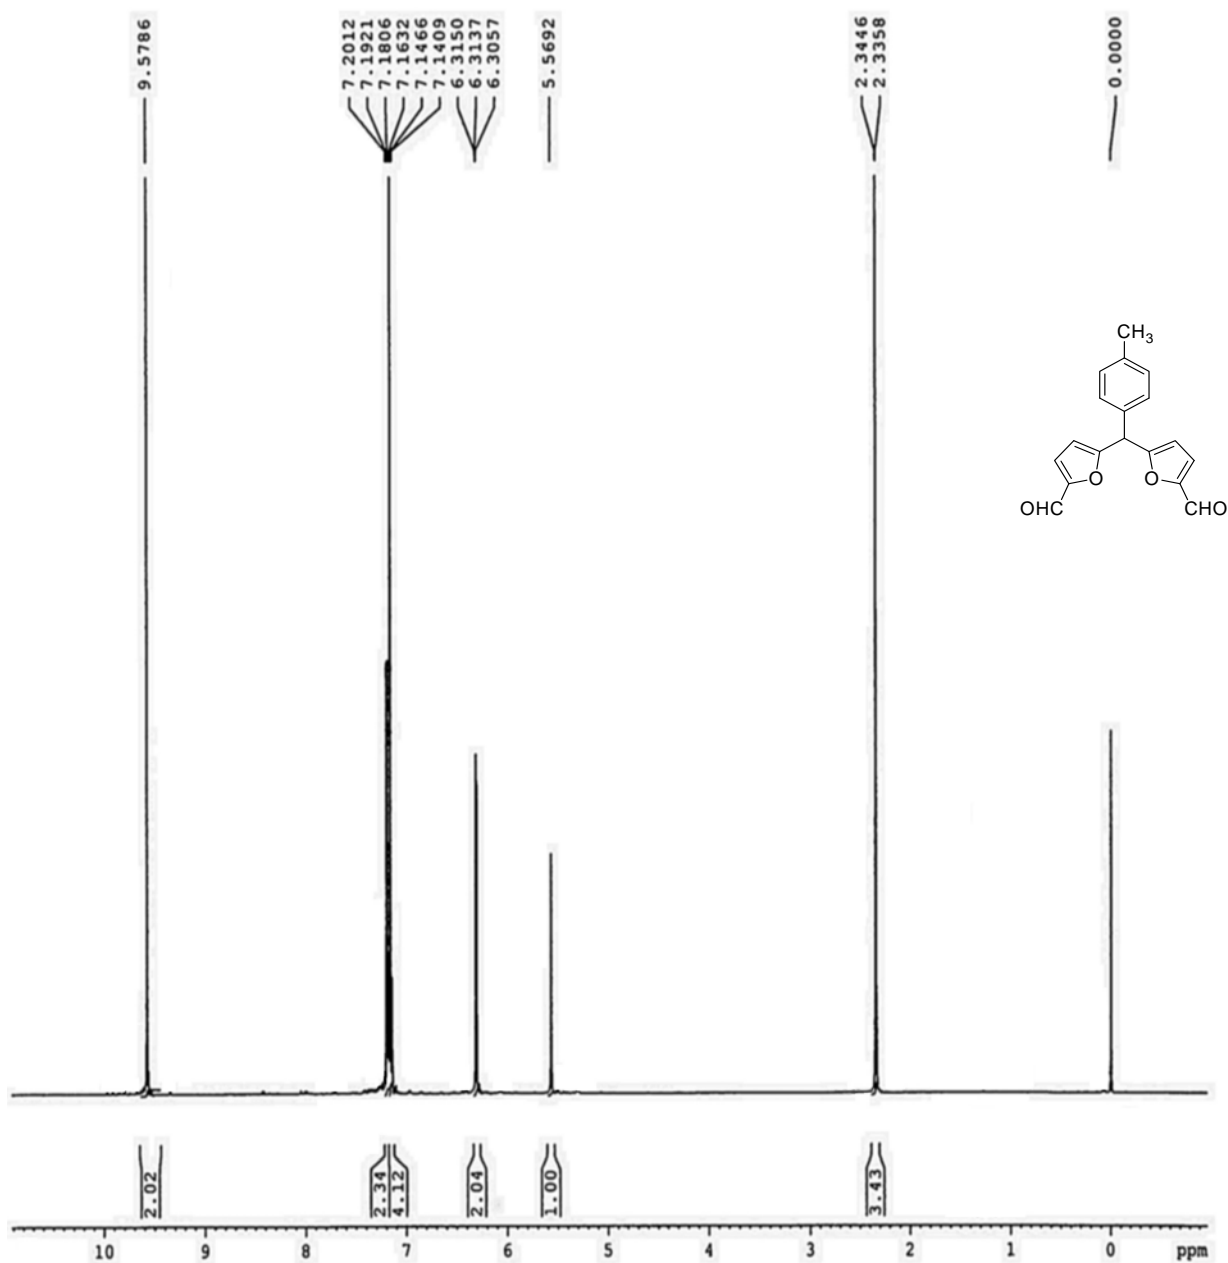

Figure S8 : <sup>1</sup>H NMR spectrum of **10b**.

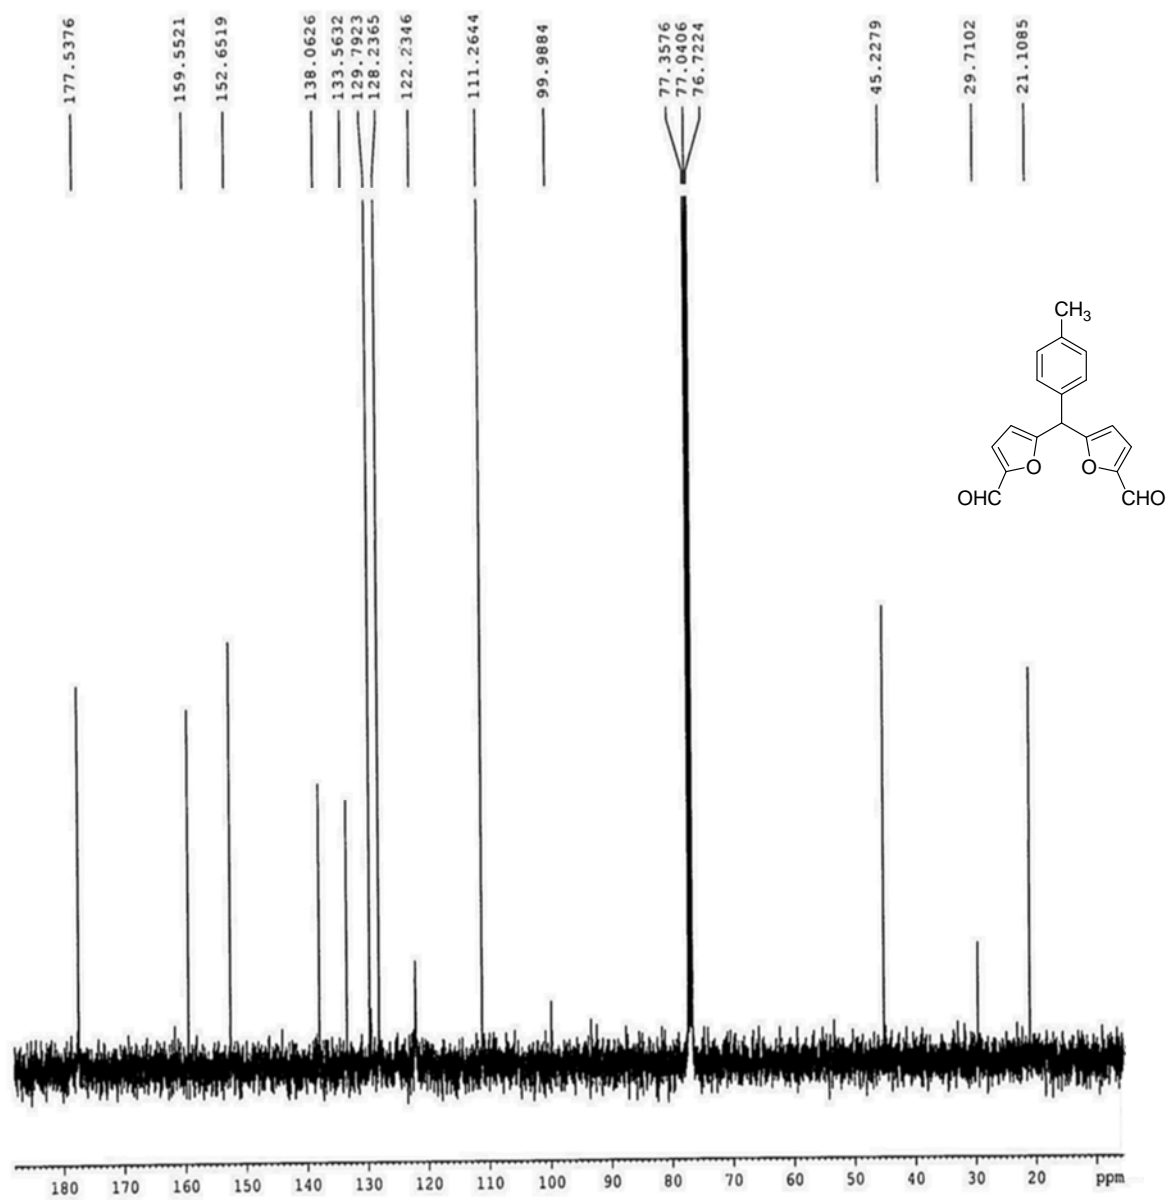

Figure S9:  $^{13}\text{C}$  NMR spectrum of **10b**.

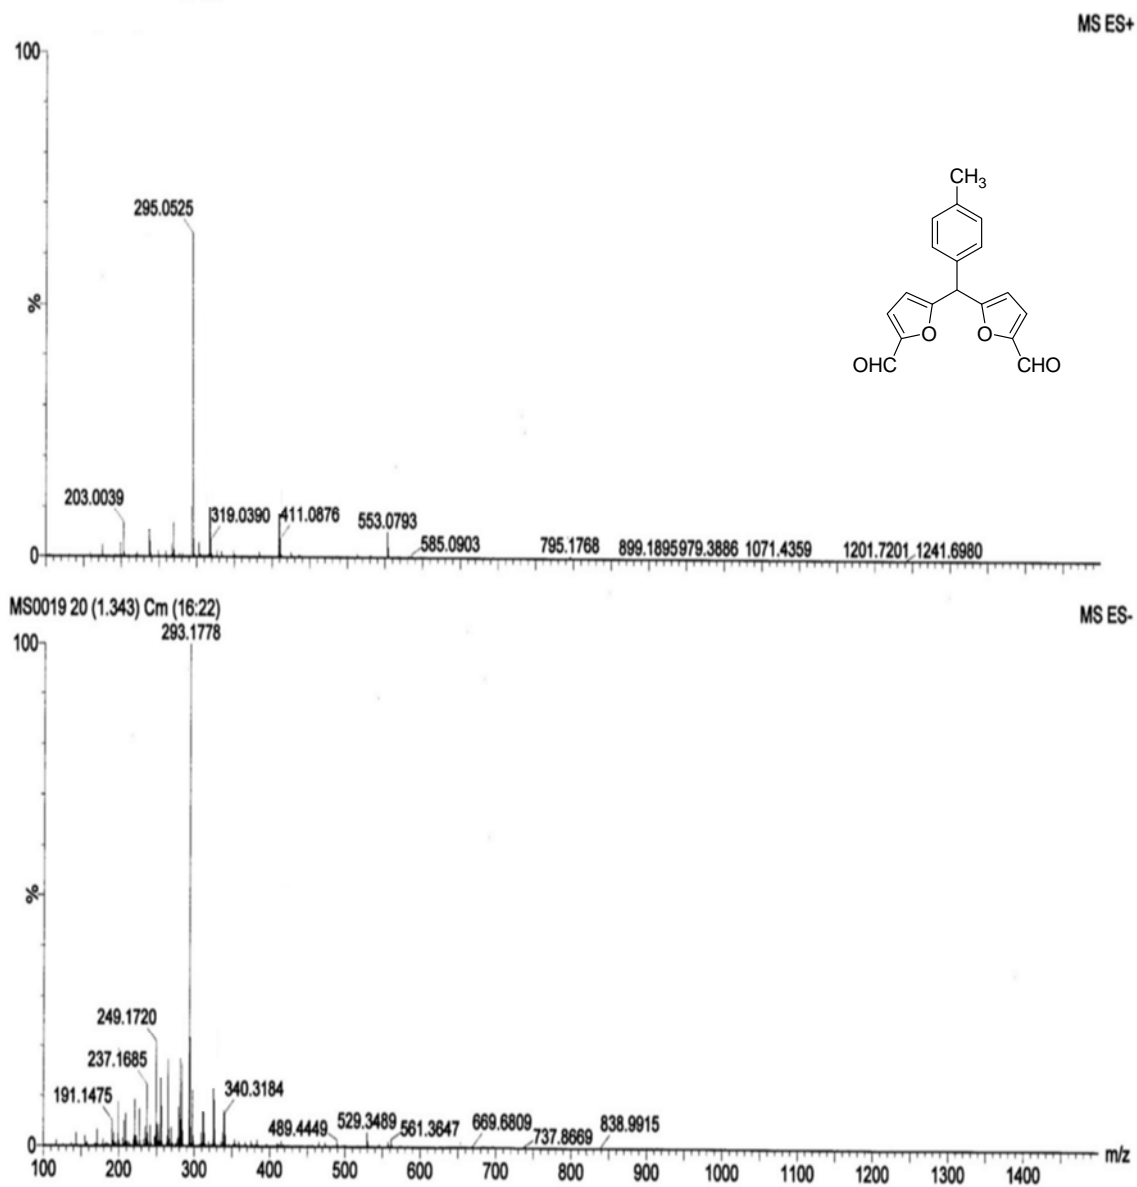

Figure S10: Mass spectrum of 10b.

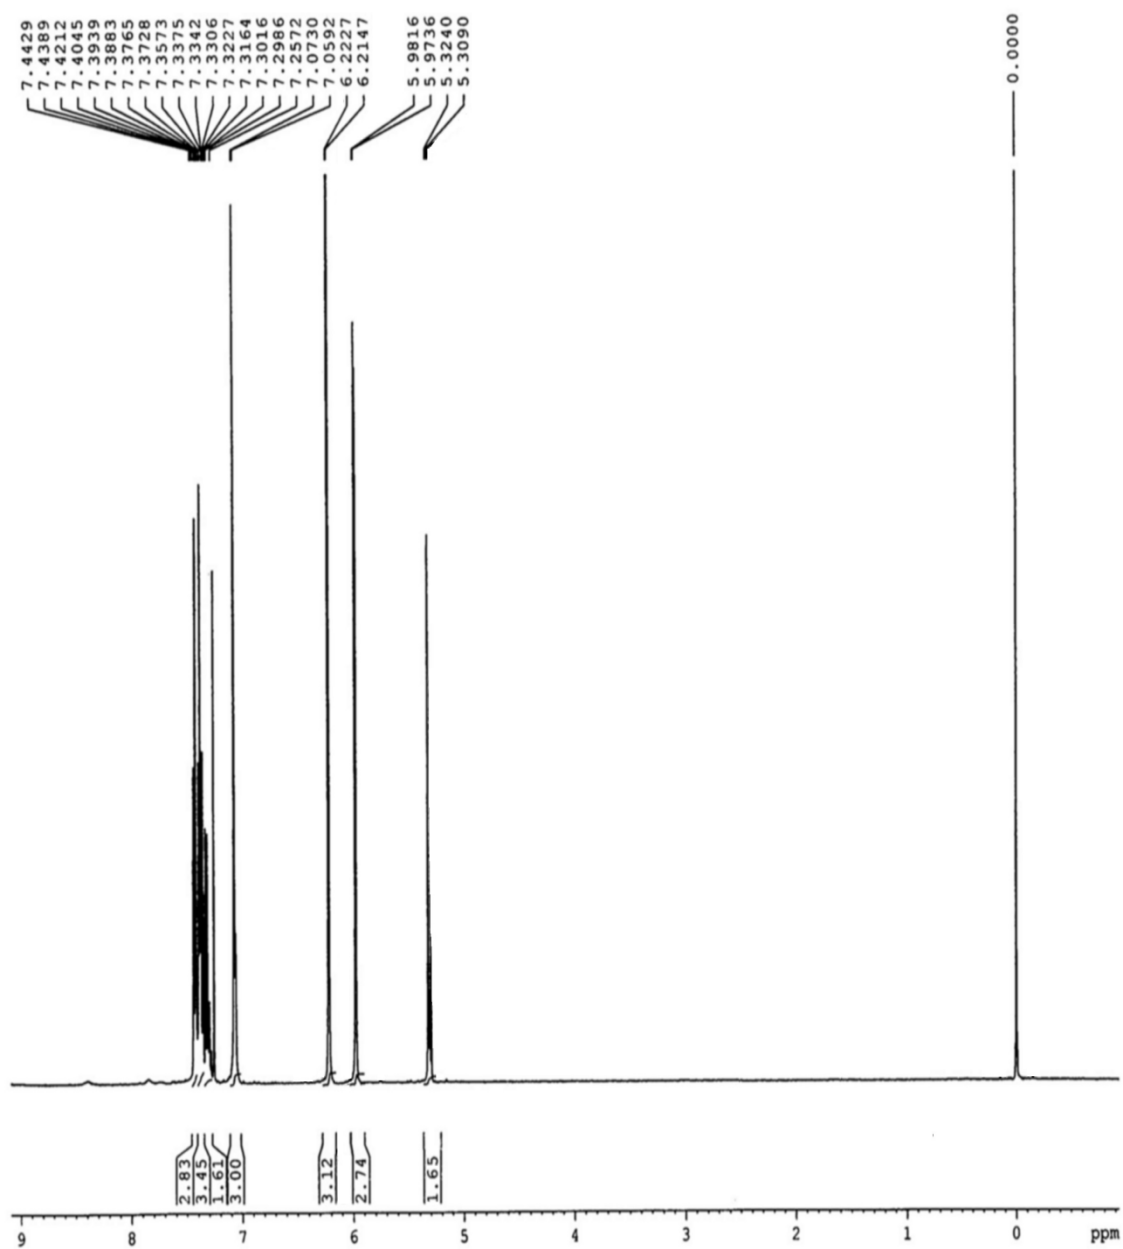

Figure S11 :  $^1\text{H}$  NMR spectrum of 11a.





MSE+

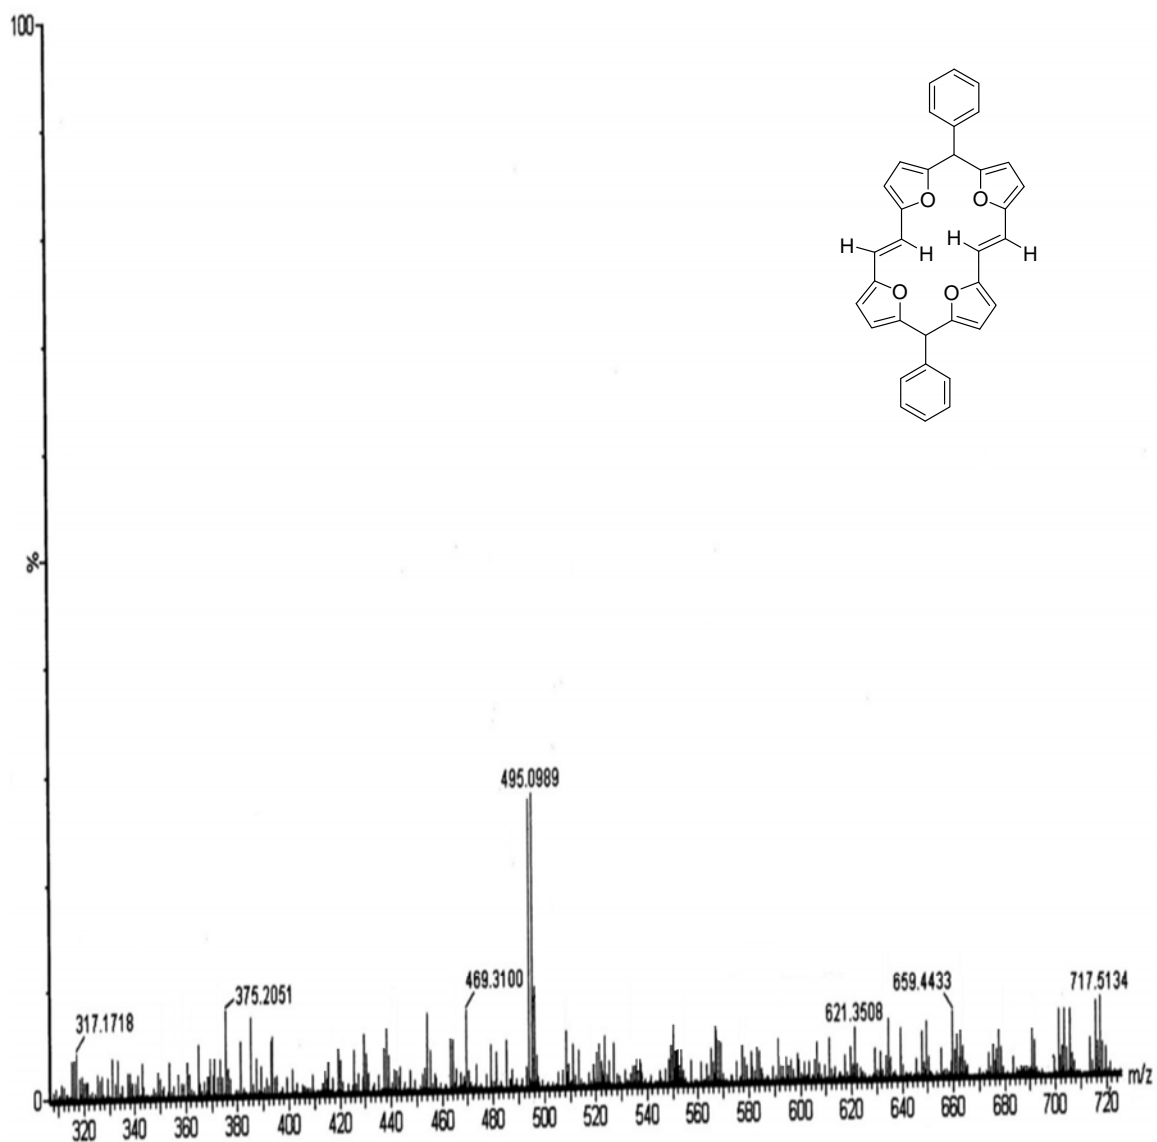

Figure S13: Mass spectrum of **11a**.

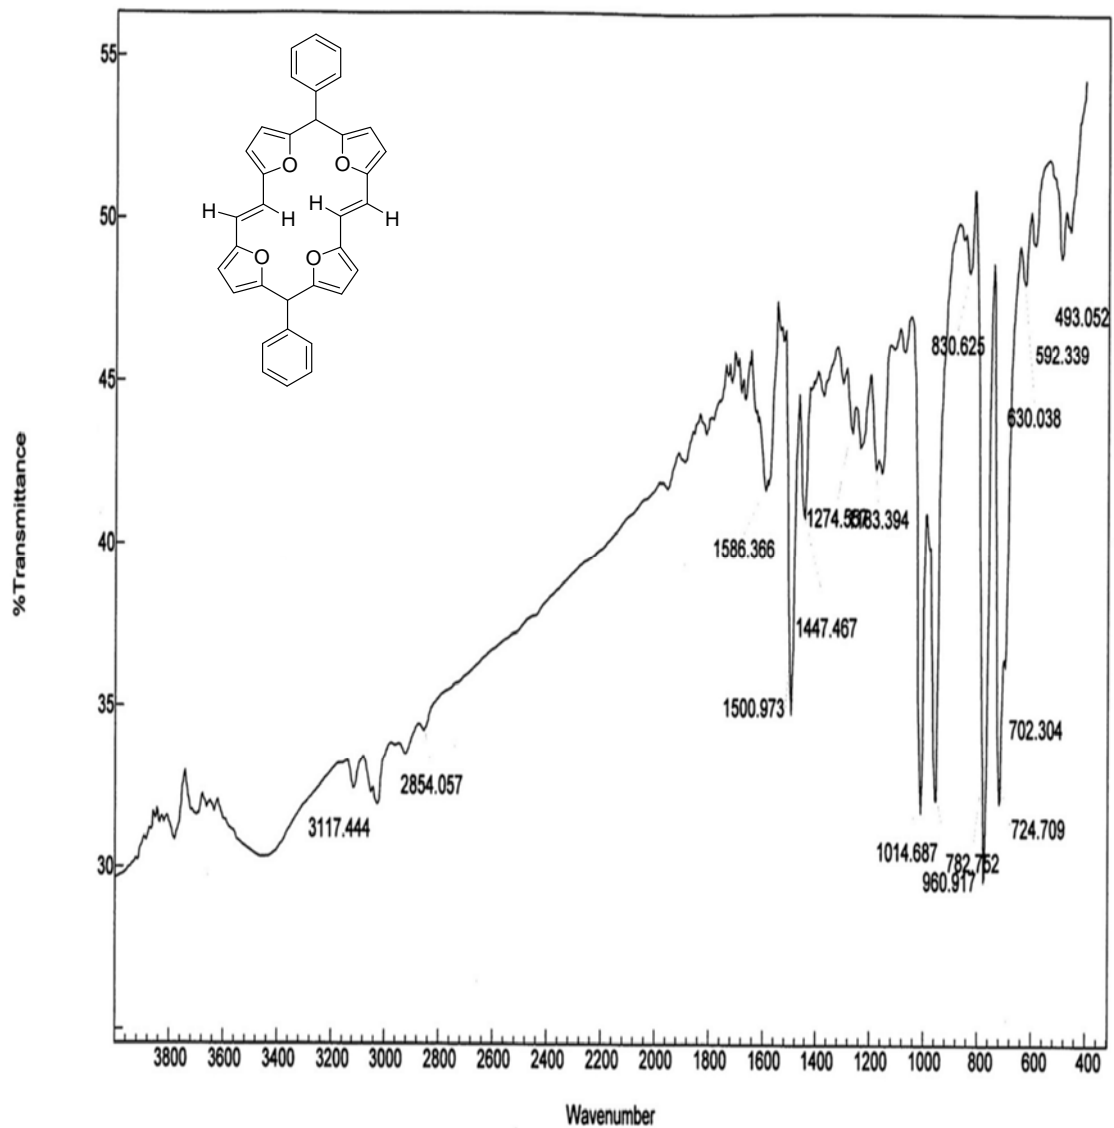

**Figure S14:** IR spectrum of **11a**.

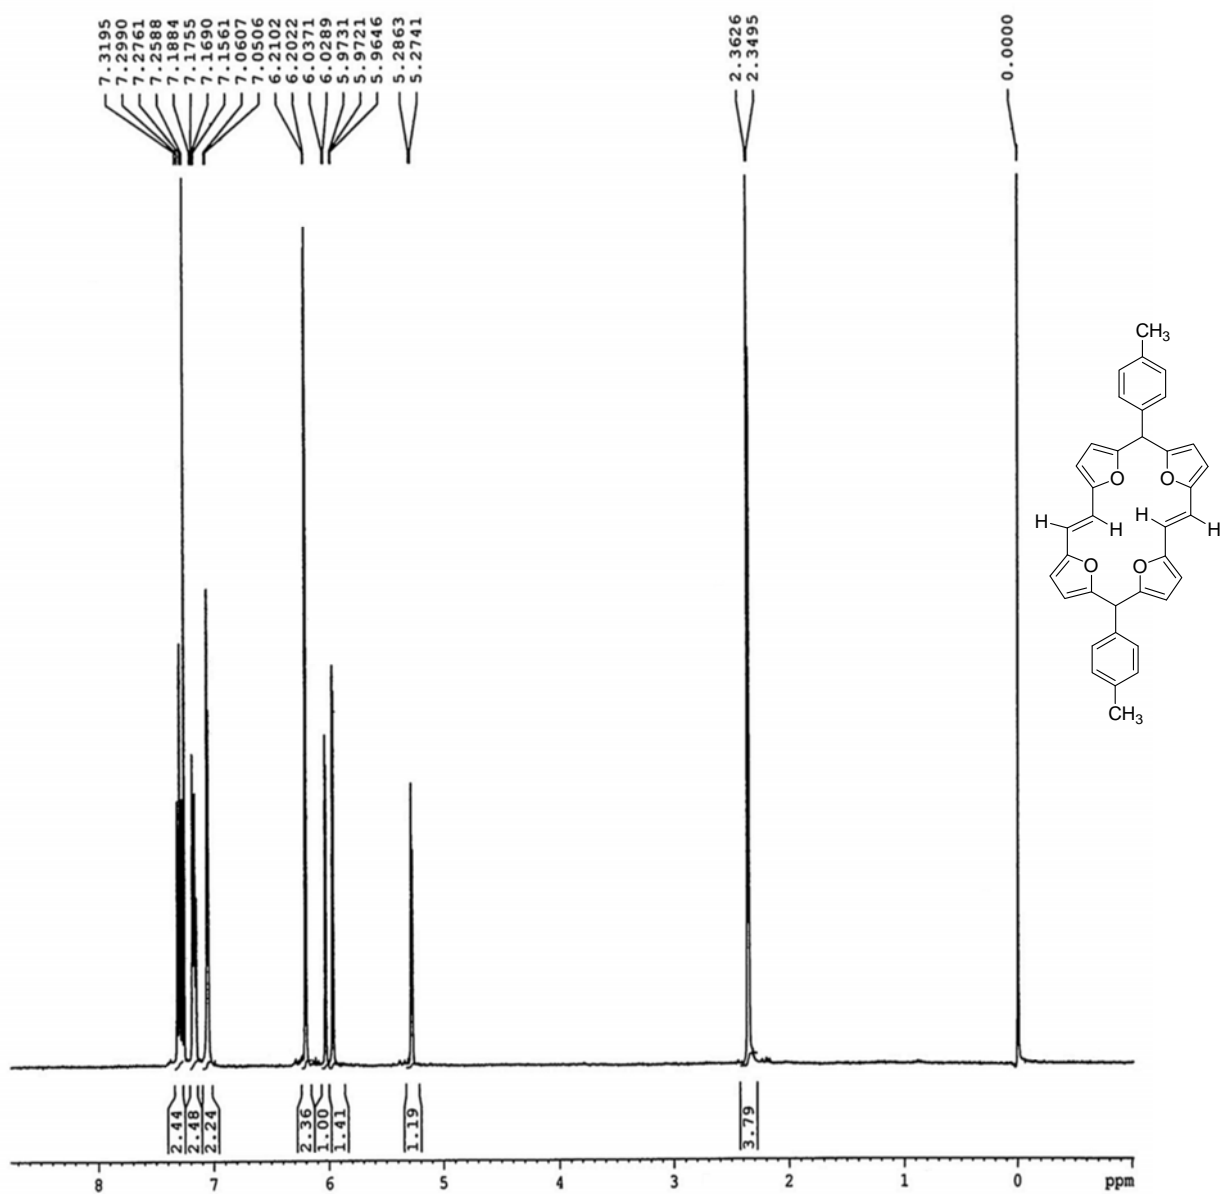

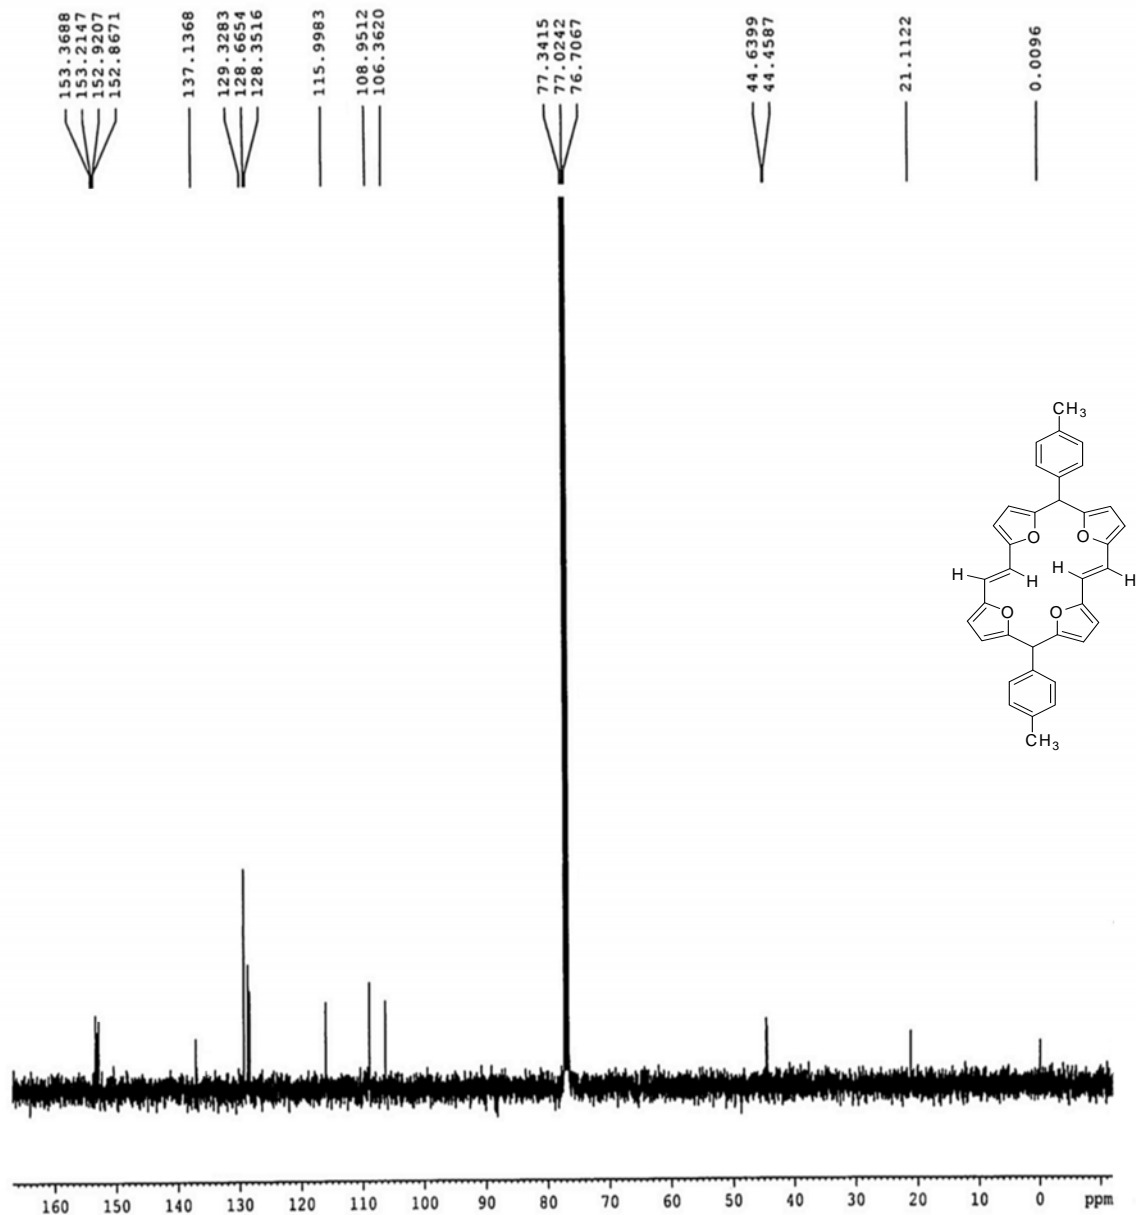

Figure S16:  $^{13}\text{C}$  NMR spectrum of **11b**.

MS ES+

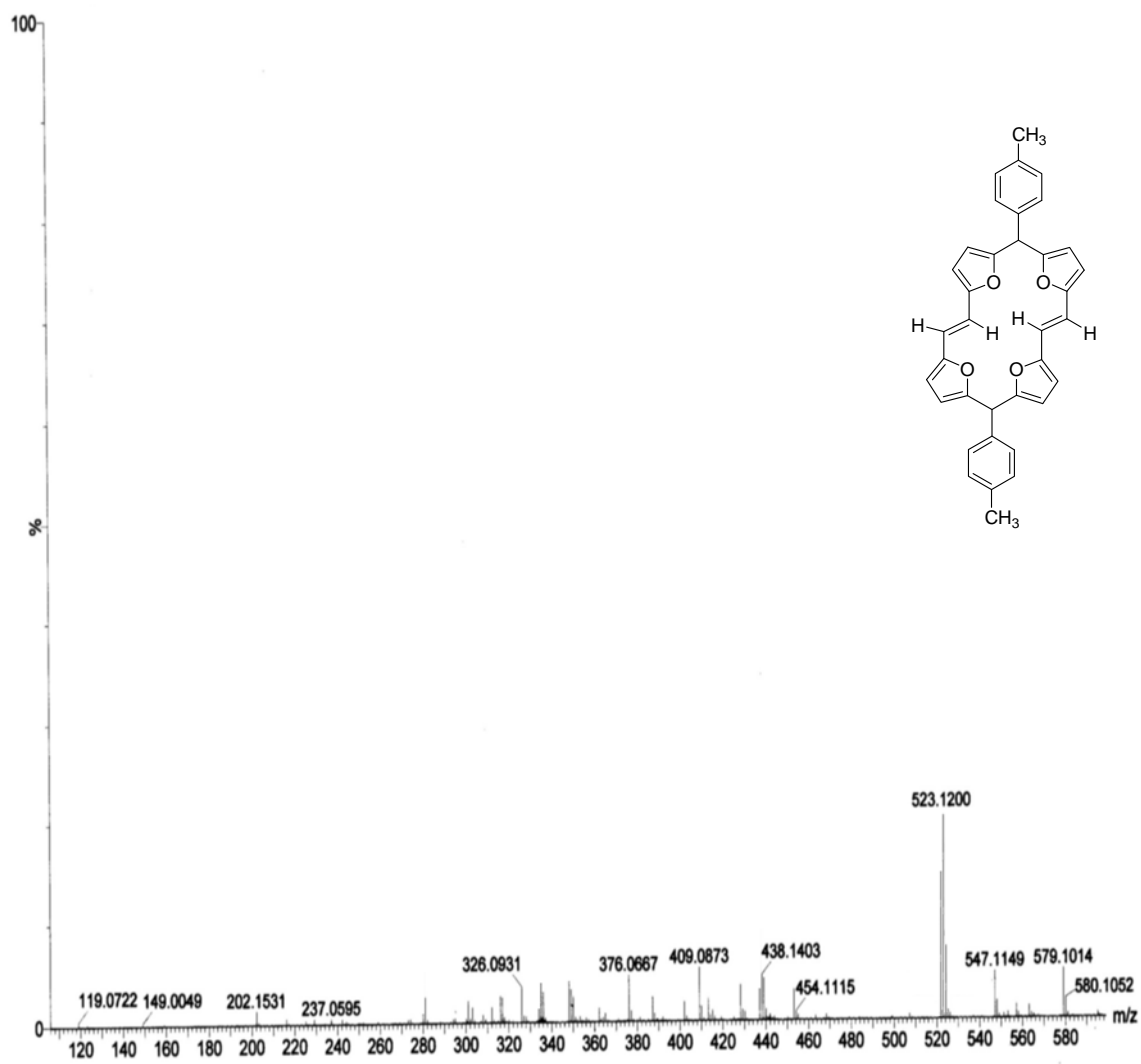

Figure S17: Mass spectrum of **11b**.

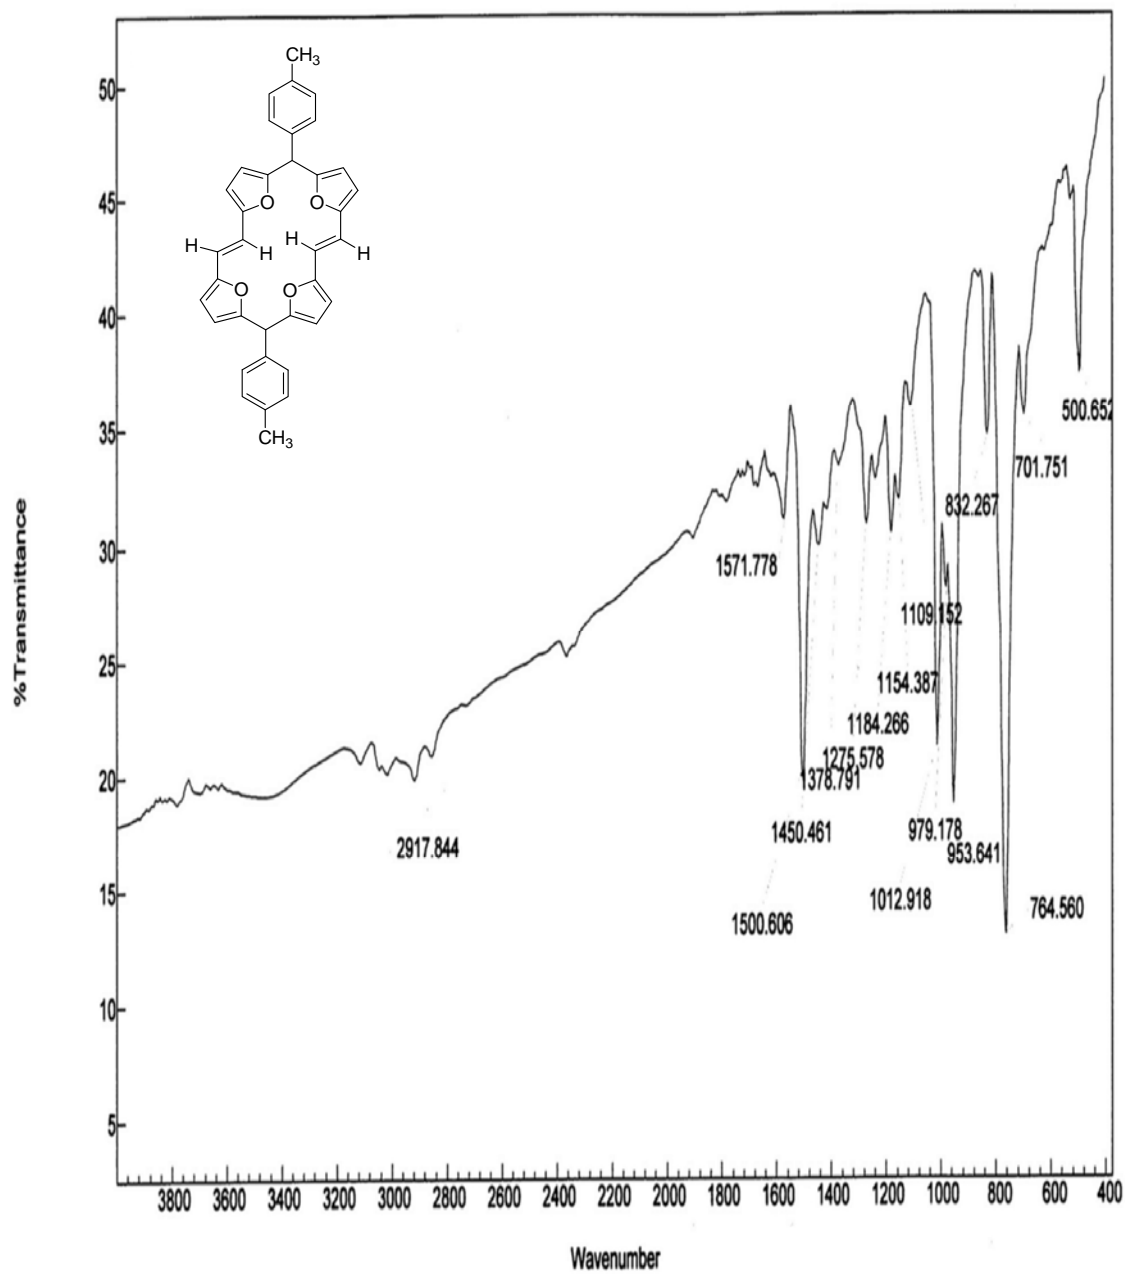

**Figure S18:** IR spectrum of **11b**.

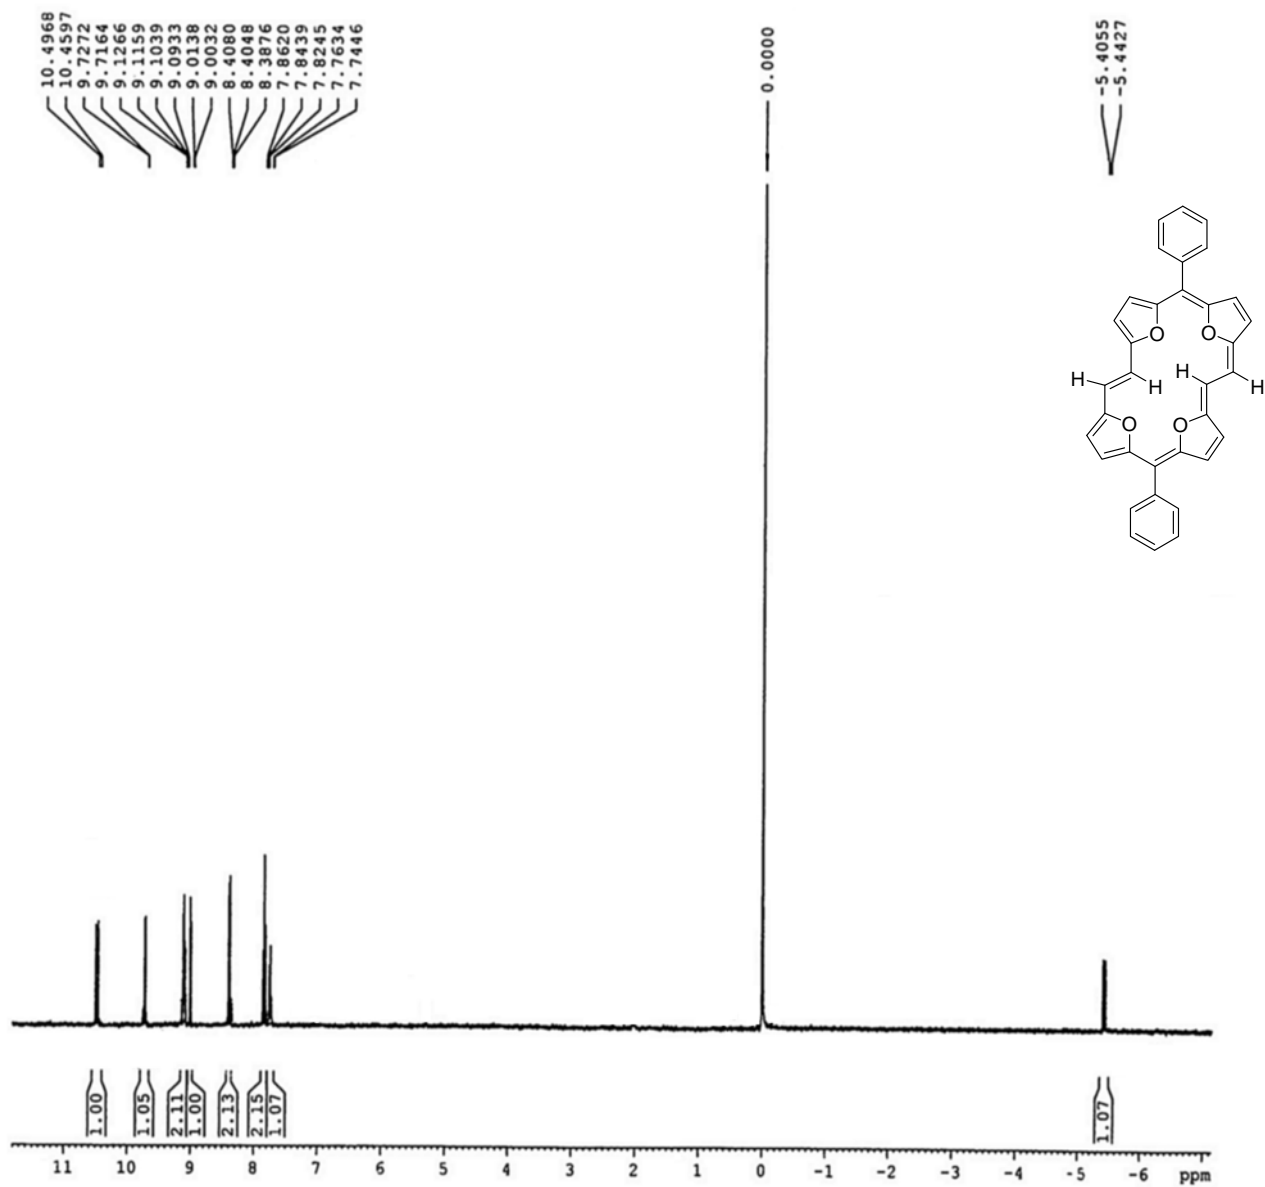



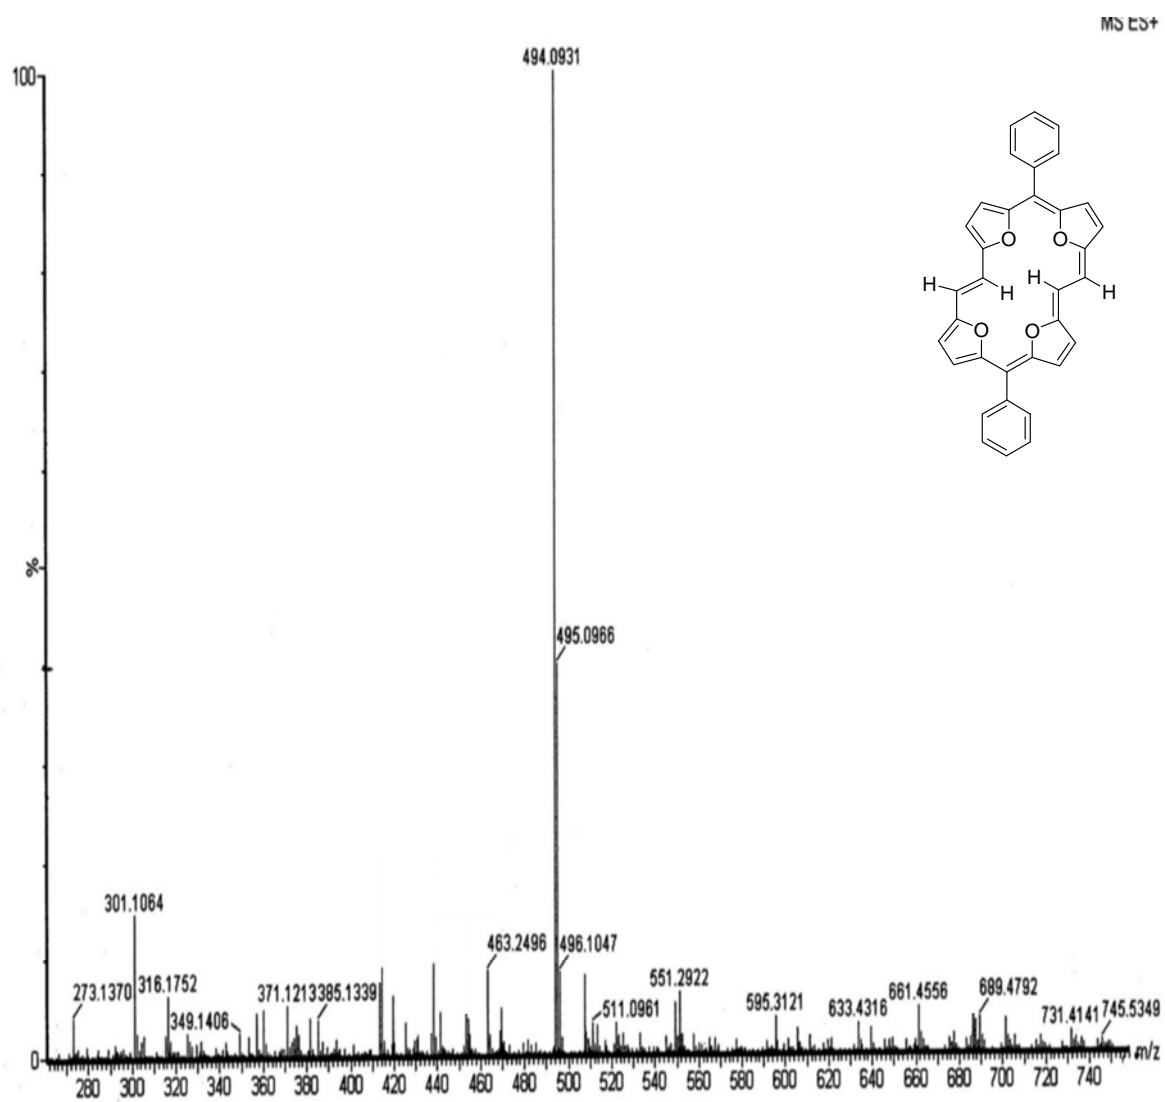

Figure S20: Mass spectrum of 12a.

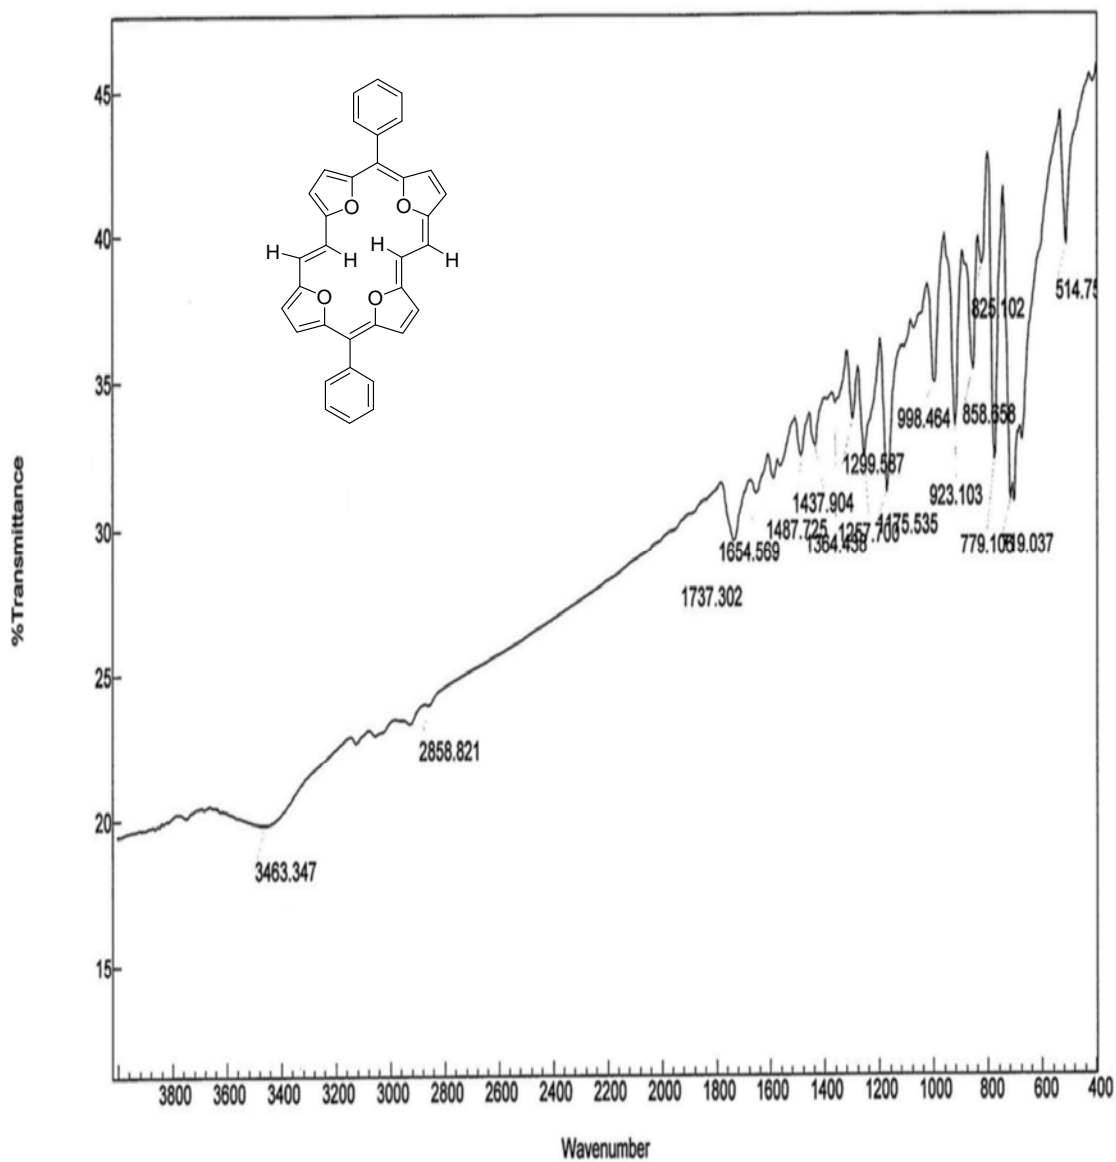

Figure S21: IR spectrum of 12a.

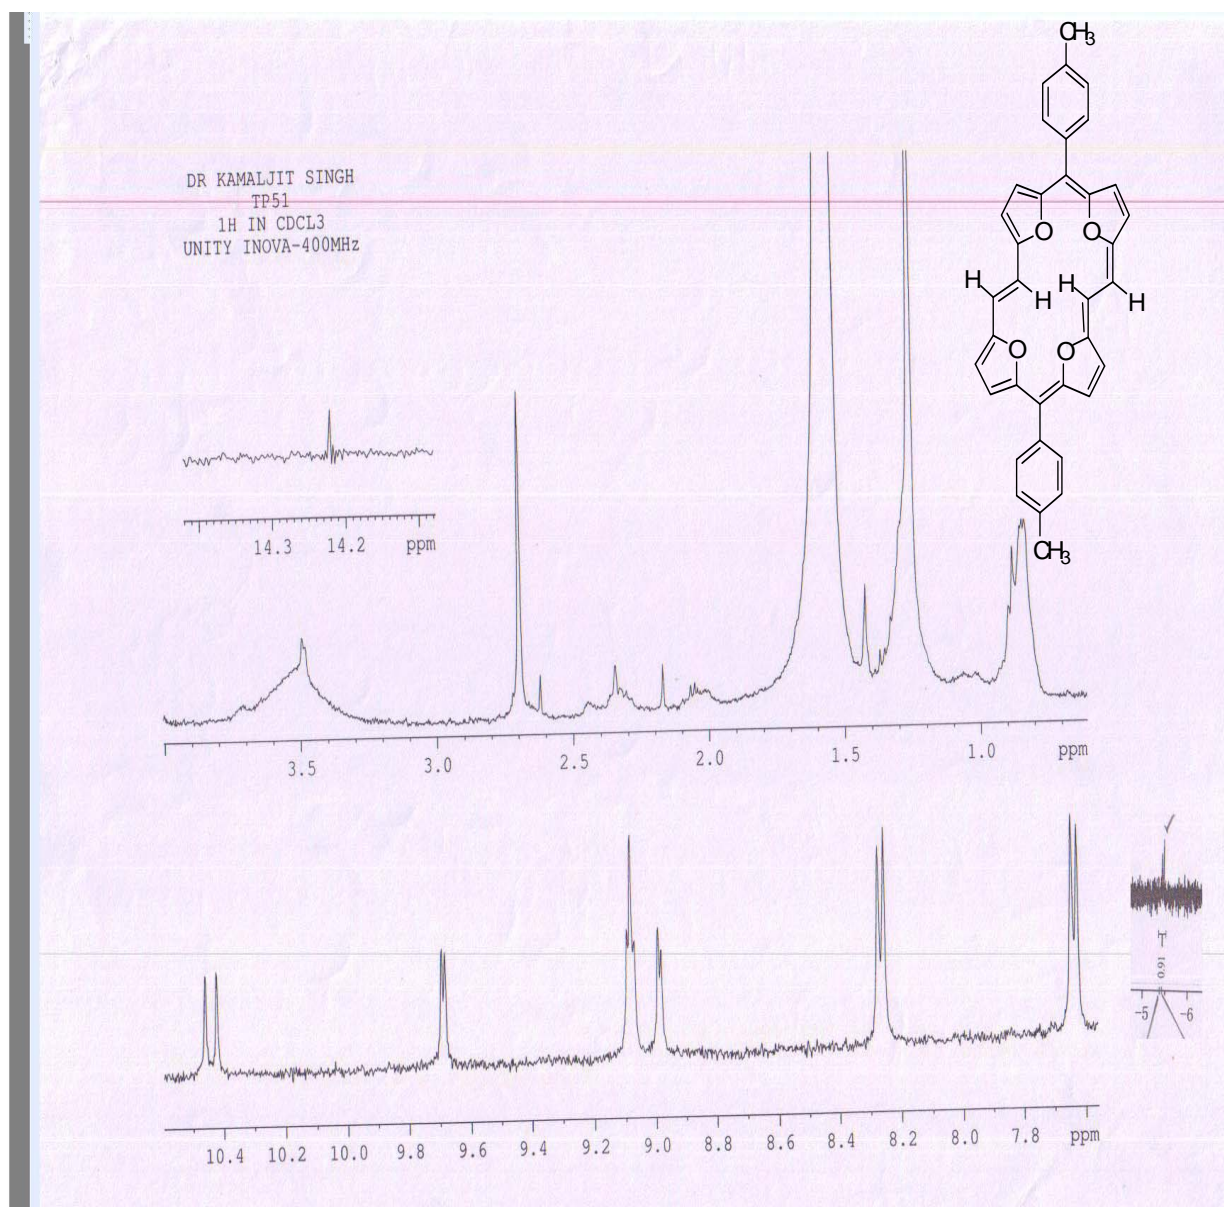

**Figure S22 :**  $^1\text{H}$  NMR spectrum of **12b** (Due to extremely low solubility of **12b** in most of the deuterated solvents, its  $^1\text{H}$  NMR spectra was obtained with great difficulty).

MS ES+

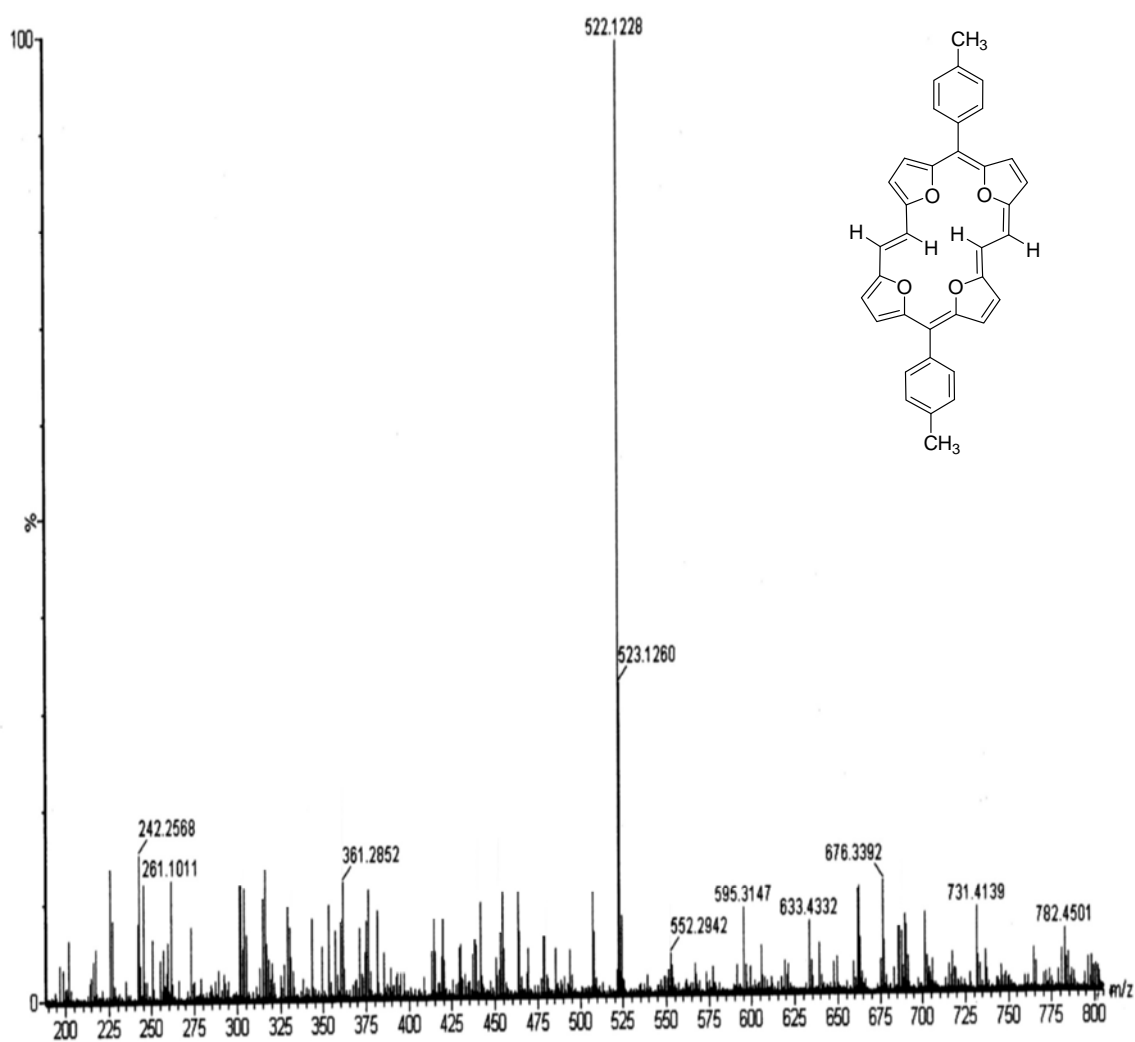

**Figure S23:** Mass spectrum of **12b**.

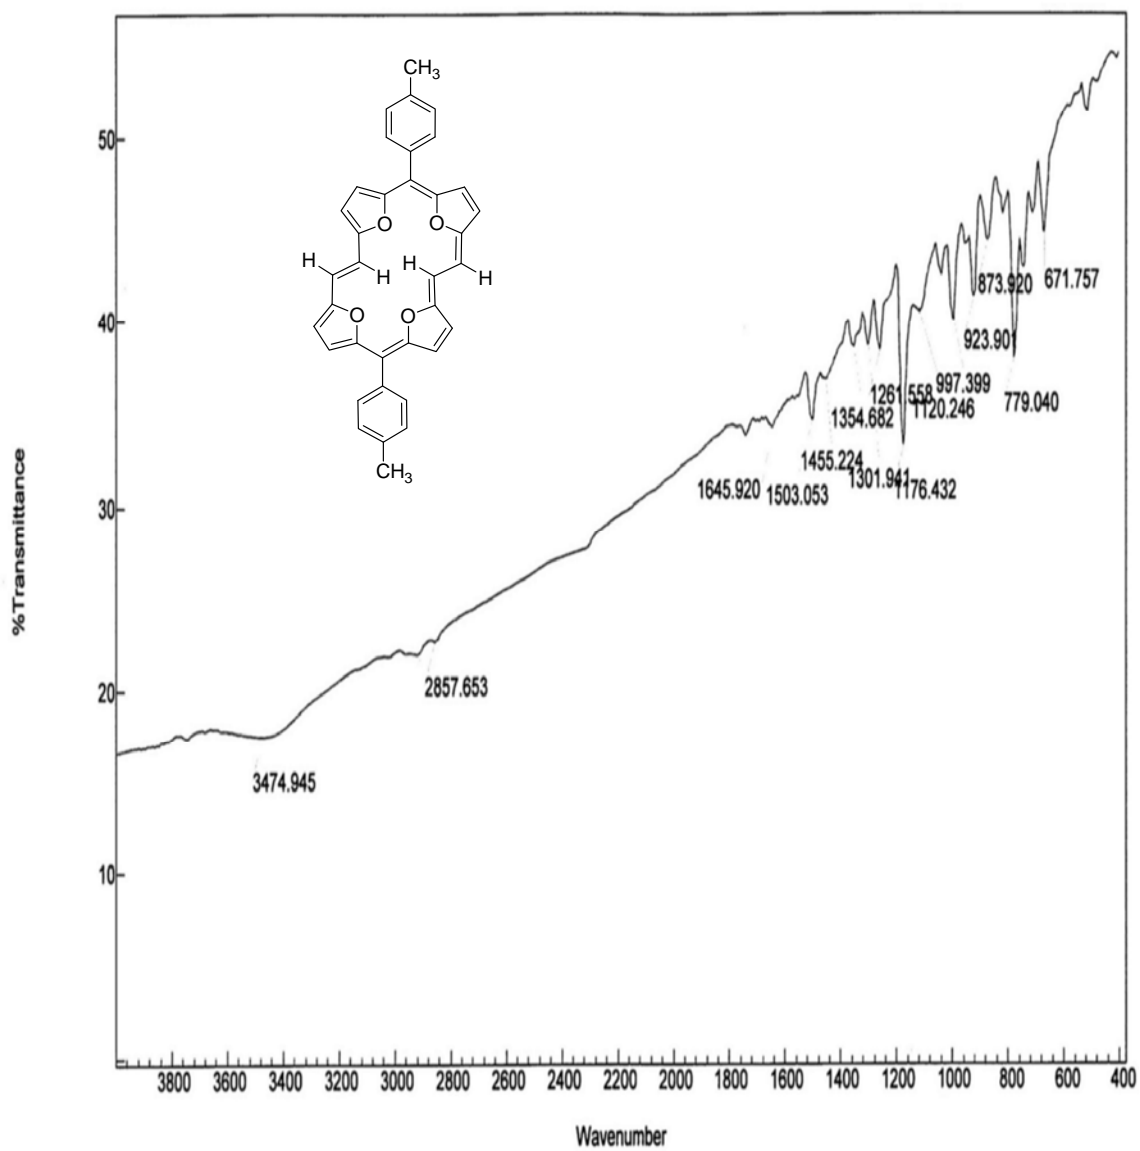

Figure S24: IR spectrum of 12b.

**Table S1.**  $^1\text{H}$  NMR (400 MHz) data of **11a/12a** and **11b/12b** ( $\text{CDCl}_3$ , TMS int.). Chemical shifts ( $\delta$ ) and coupling constants  $J$  [Hz] (Scheme 1).

| $\delta$ /ppm<br>( $J$ /Hz) | <b>11a</b>               | <b>11b</b>                    | <b>12a</b>                          | <b>12b</b>                         |
|-----------------------------|--------------------------|-------------------------------|-------------------------------------|------------------------------------|
| H2/H8                       | 6.22<br>( $J_{2,3}$ 3.2) | 6.21<br>( $J_{2,3}$ 3.2)      | 9.72/9.12<br>( $J_{2,3}$ 4.32)      | 9.67/9.10<br>( $J_{2,3}$ 5.0)      |
| H3/H7                       | 5.97<br>( $J_{7,8}$ 3.2) | 5.96/6.02<br>( $J_{7,8}$ 3.2) | 9.01/9.09<br>( $J_{7,8}$ 4.24)      | 9.10/8.98<br>( $J_{7,8}$ 5.0)      |
| H10/H11                     | 7.07 <sup>[a]</sup>      | 7.05/7.06 <sup>[a]</sup>      | 10.46/-5.42<br>( $J_{10,11}$ 14.84) | 10.42/-5.40<br>( $J_{10,11}$ 15.0) |

[a] singlet

## Theoretical Calculations

### Computational methods

All the calculations were performed at the density functional theory (DFT) level with the B3LYP functional, the gradient correction of the exchange functional by Becke and the correlation functional by Lee, Yang and Parr. The 6-311G(d) split valence plus polarization basis set was used in Gaussian 09 program.<sup>[2],[3]</sup> The results were analyzed and visualized on Gauss View 5.0.9.

<sup>[2]</sup> Gaussian 09, Revision B.01, Frisch, M. J.; Trucks, G. W.; Schlegel, H. B.; Scuseria, W. H. G. E.; Robb, M. A.; Cheeseman, J. R.; Scalmani, G.; Barone, V.; Mennucci, B.; Petersson, G. A.; Nakatsuji, H.; Caricato, M.; Li, X.; Hratchian, H. P.; Izmaylov, A. F.; Bloino, J.; Zheng, G.; Sonnenberg, J. L.; Hada, M.; Ehara, M.; Toyota, K.; Fukuda, R.; Hasegawa, J.; Ishida, M.; Nakajima, T.; Honda, Y.; Kitao, O.; Nakai, H.; Vreven, T.; Montgomery, J. A.; Peralta, Jr., J. E.; Ogliaro, F.; Bearpark, M.; Heyd, J. J.; Brothers, E.; Kudin, K. N.; Staroverov, V. N.; Keith, T.; Kobayashi, R.; Normand, J.; Raghavachari, K.; Rendell, A.; Burant, J. C.; Iyengar, S. S.; Tomasi, J.; Cossi, M.; Rega, N.; Millam, J. M.; Klene, M.; Knox, J. E.; Cross, J. B.; Bakken, V.; Adamo, C.; Jaramillo, J.; Gomperts, R.; Stratmann, R. E.; Yazyev, O.; Austin, A. J.; Cammi, R.; Pomelli, C.; Ochterski, J. W.; Martin, R. L.; Morokuma, K.; Zakrzewski, V. G.; Voth, G. A.; Salvador, P.; Dannenberg, J. J.; Dapprich, S.; Daniels, A. D.; Farkas, O.; Foresman, J. B.; Ortiz, J. V.; Cioslowski, J.; Fox, D. J. Gaussian, Inc., Wallingford CT, 2010.

<sup>[3]</sup> Details including the references for the DFT method and basis set can be found online at the homepage of Gaussian, Inc.; <http://www.gaussian.com/>

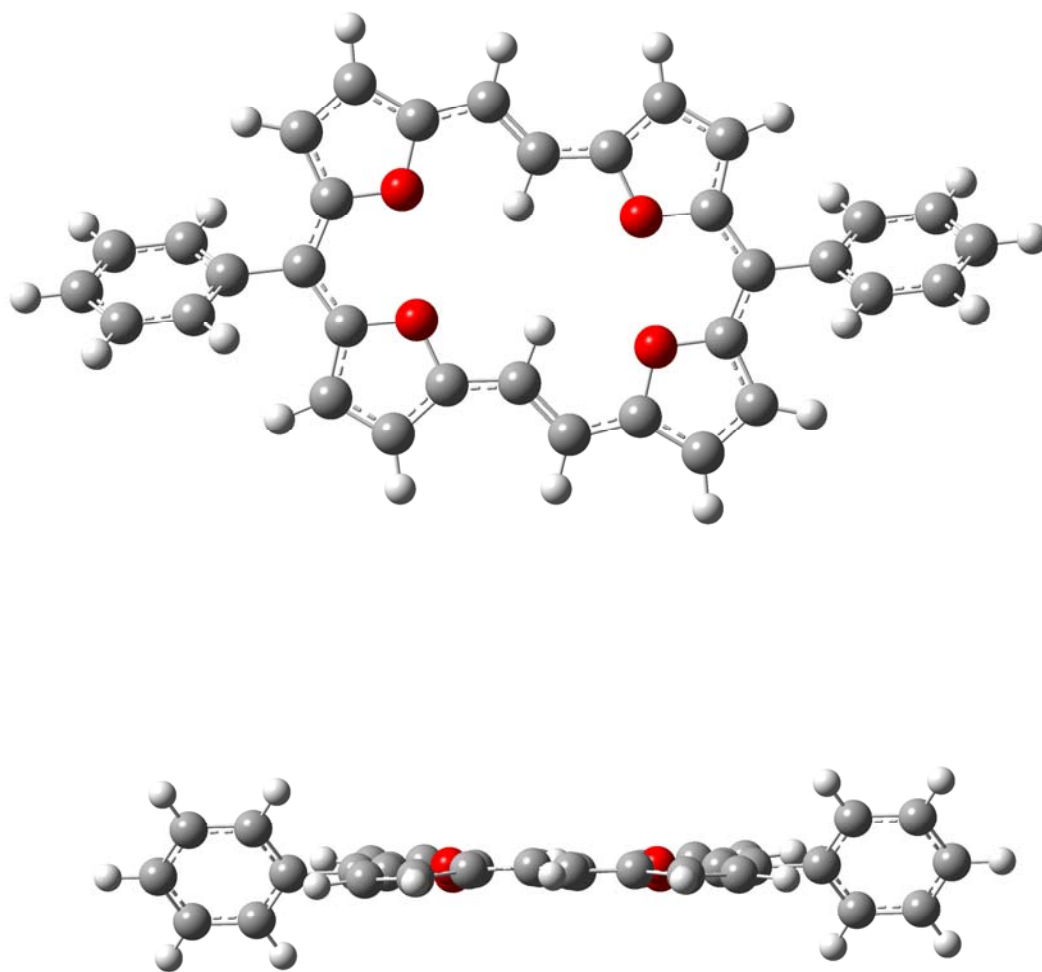

**Figure S25:** Energy minimized structure of **12a** by DFT method at B3LYP/6-311G(d) level using the Gaussian09 program (Top and side views shown above).

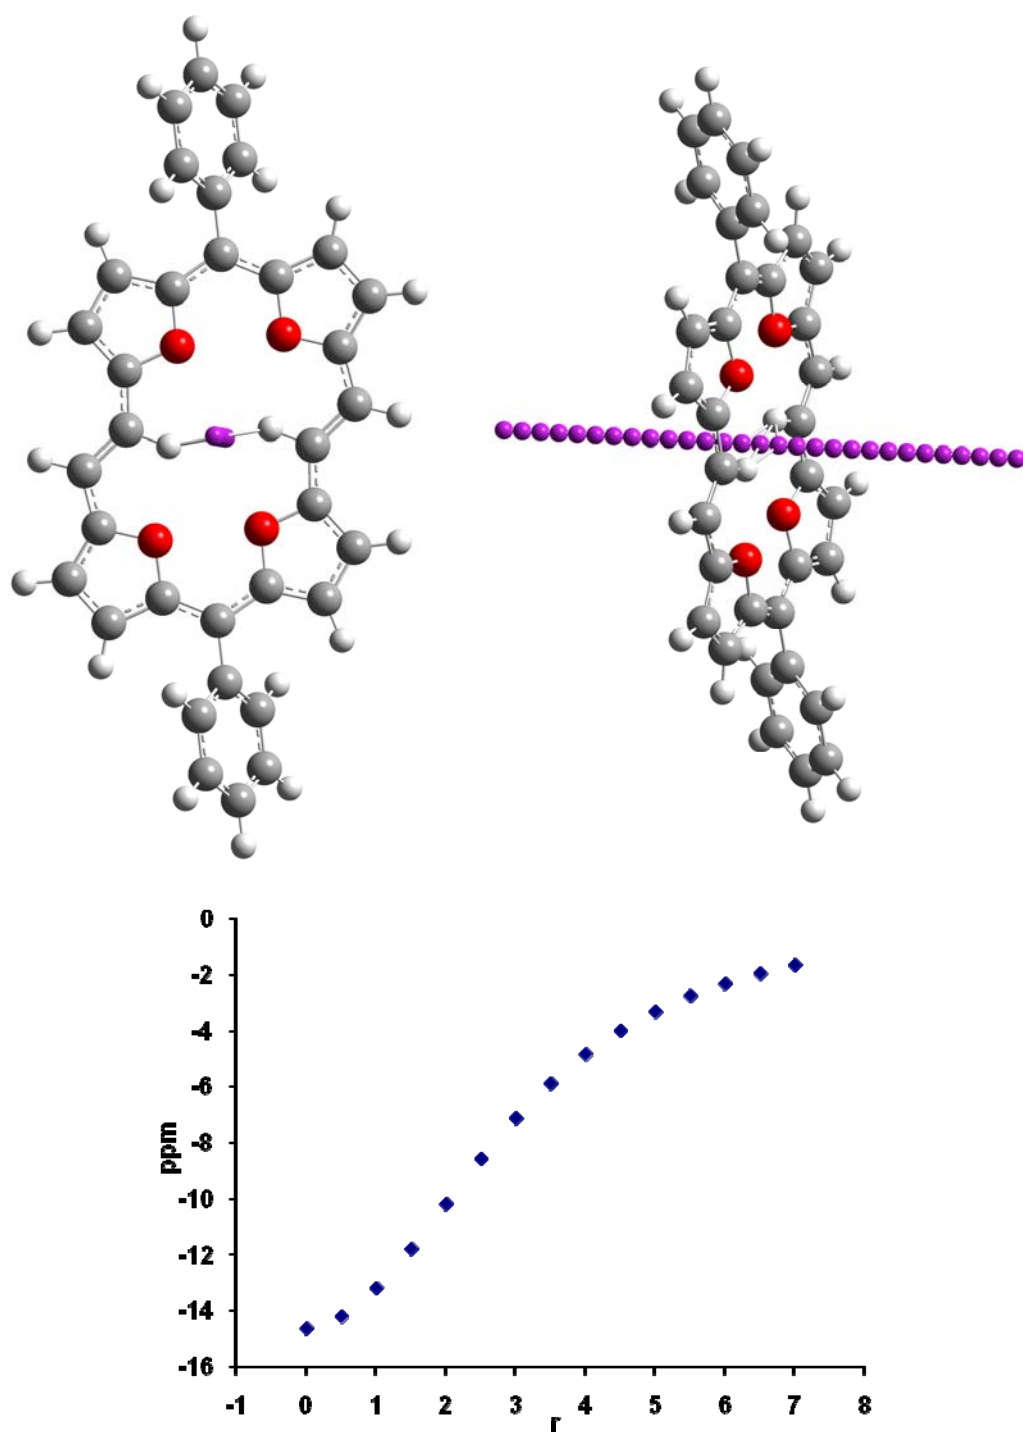

**Figure S26:** The ghost (Bq) atoms were placed (0.5 Å interval) in the centre of the molecule (in purple). The -ve NICS values clearly indicate the aromaticity of **12a**. NICS is maximum at 0 Å and decreases as the distance of the ghost atom is increased in 0.5 Å intervals.



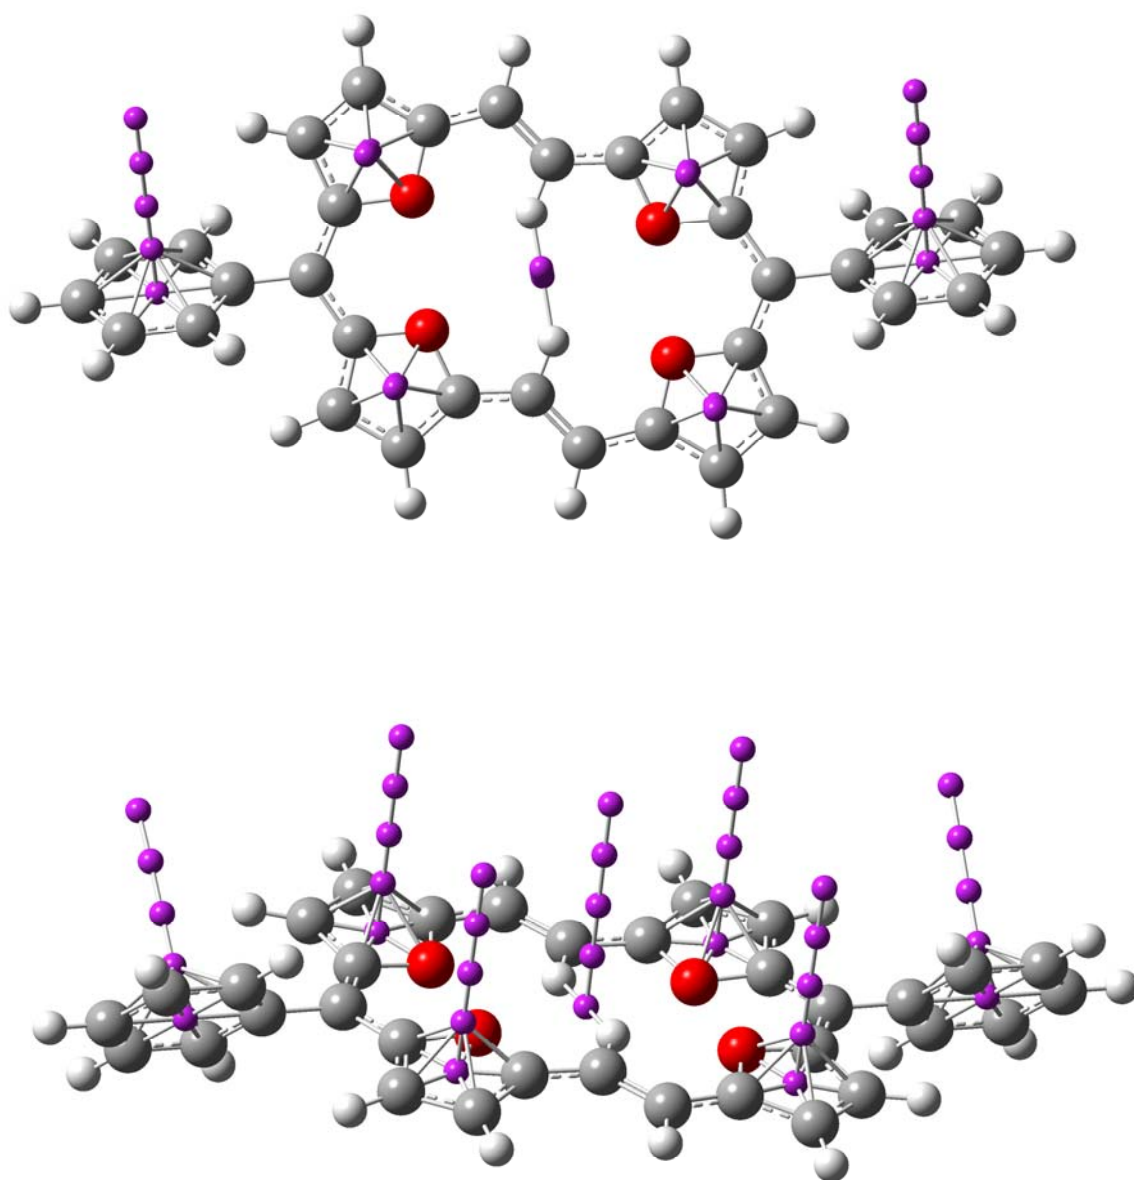

**Figure S27:** Calculation of NICS values for all individual rings in **12a**. The calculation was performed by placing ghost atoms at 1 Å intervals. The NICS vs.  $r$  (distance from centre in Å) graphs are shown on the next page (Figure S28).

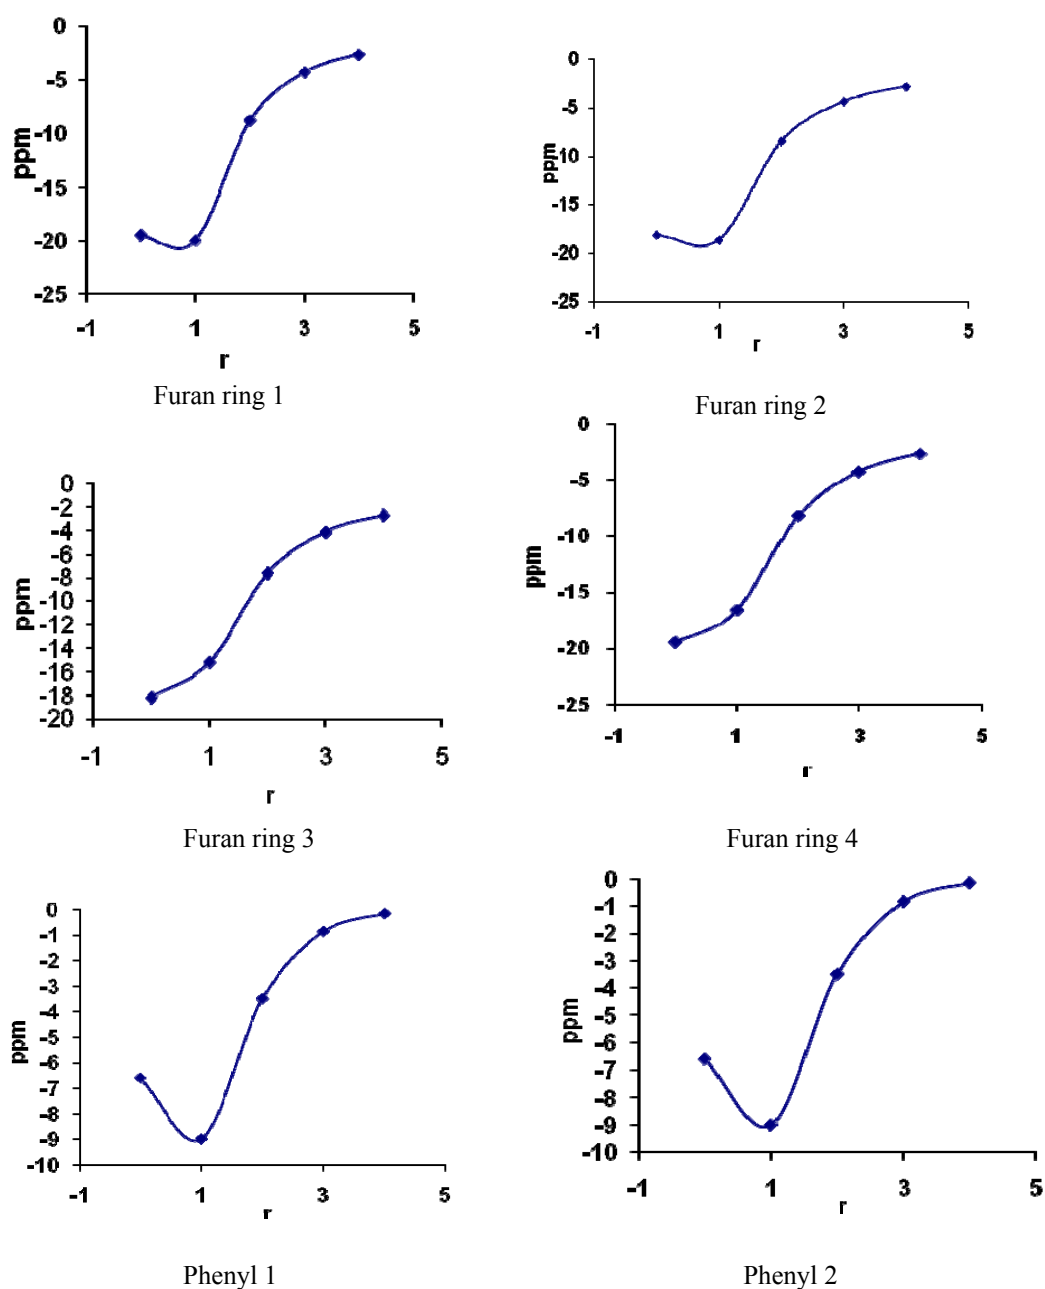

**Figure S28:** As shown above, a set of two furan rings of **12a** (attached to one of the trans double bond) are showing a dip at 1 Å in the calculated NICS values. The behavior of two furan rings is also different from an isolated furan ring (which shows no dip at 1 Å).<sup>[4]</sup> This is also clear from the X-Ray structure. Further, phenyl rings are showing the normal behavior like benzene but with decreased NICS values.

[4] A. Stanger, *J. Org. Chem.* **2006**, *71*, 883-893.

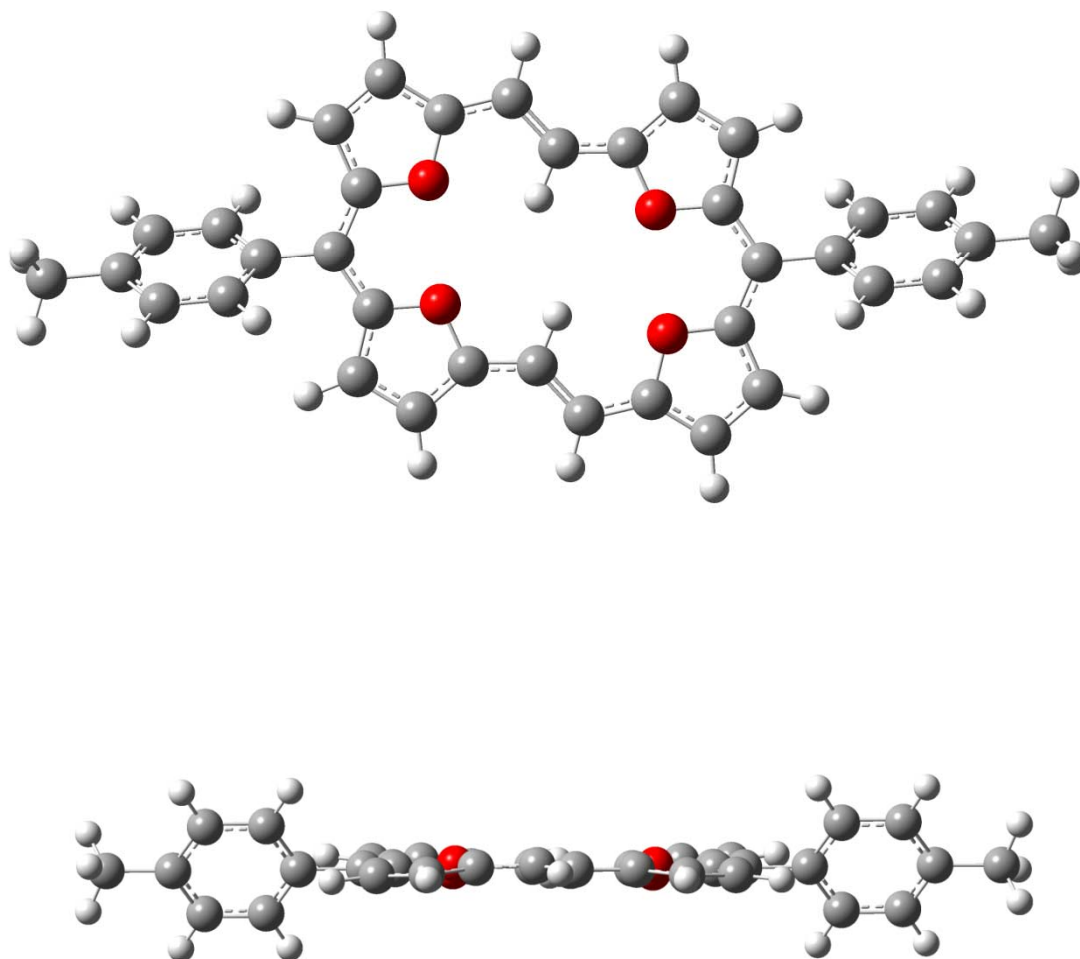

**Figure S29:** Energy minimized structure of **12b** by DFT method at B3LYP/6-311G(d) level using the Gaussian09 software package (Top and side views).

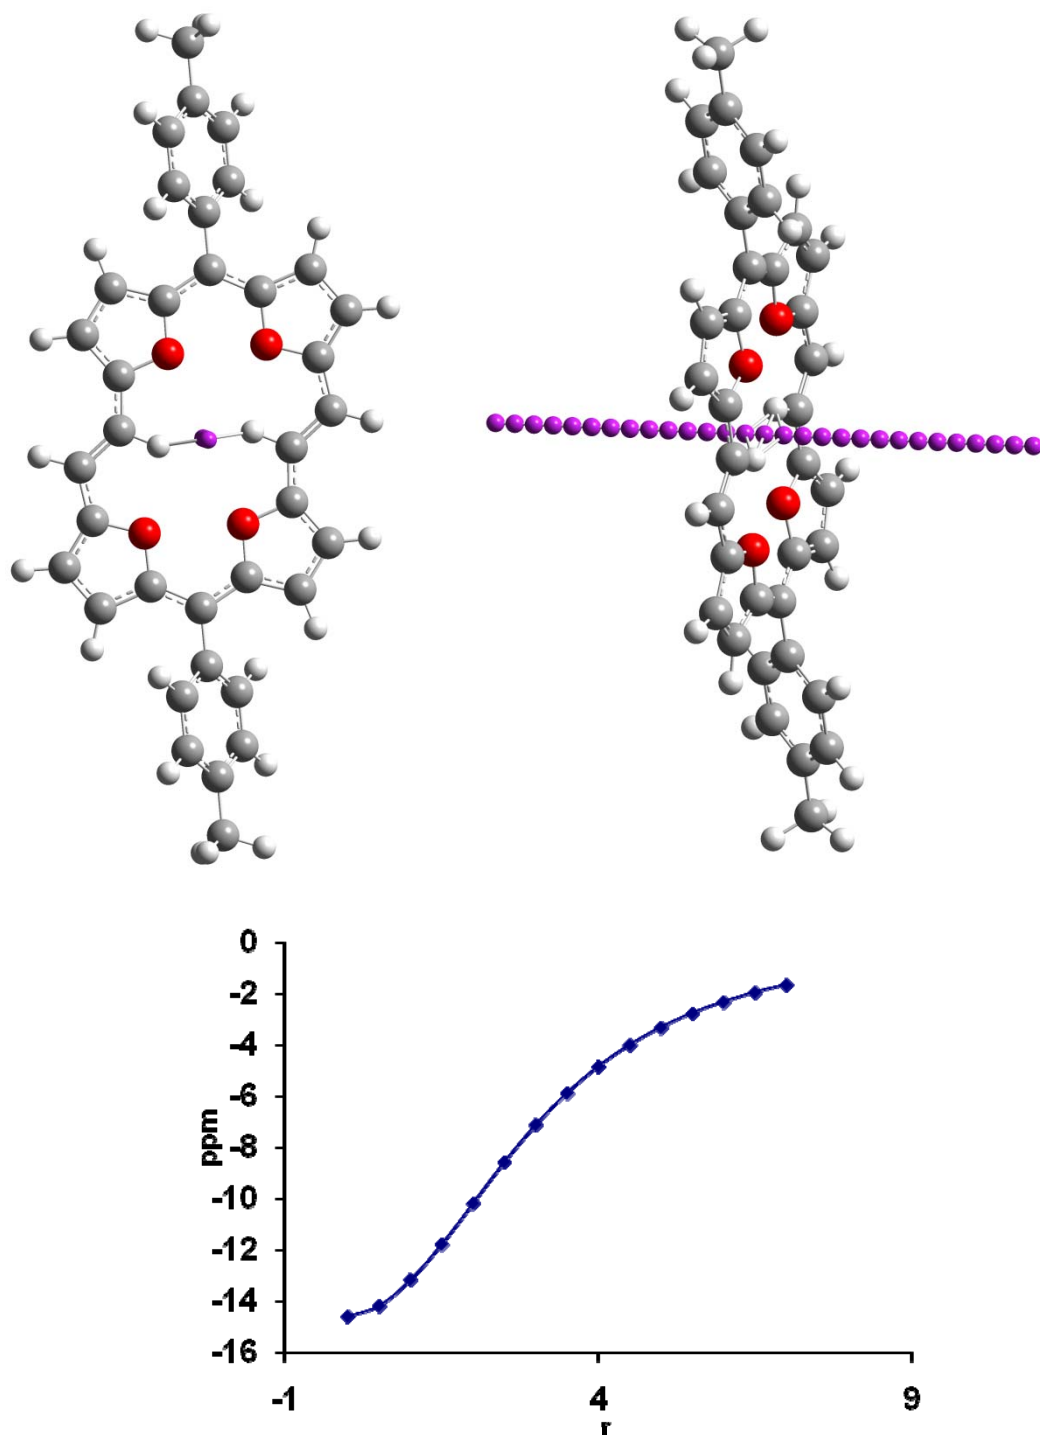

**Figure S30:** The ghost (Bq) atoms were placed at the centre of the molecule (in purple) at successive distances of 0.5 Å to probe the aromaticity. The -ve values of NICS clearly displays the aromaticity of **12b**. At centre NICS is maximum and it goes on decreasing as we move farther from the centre

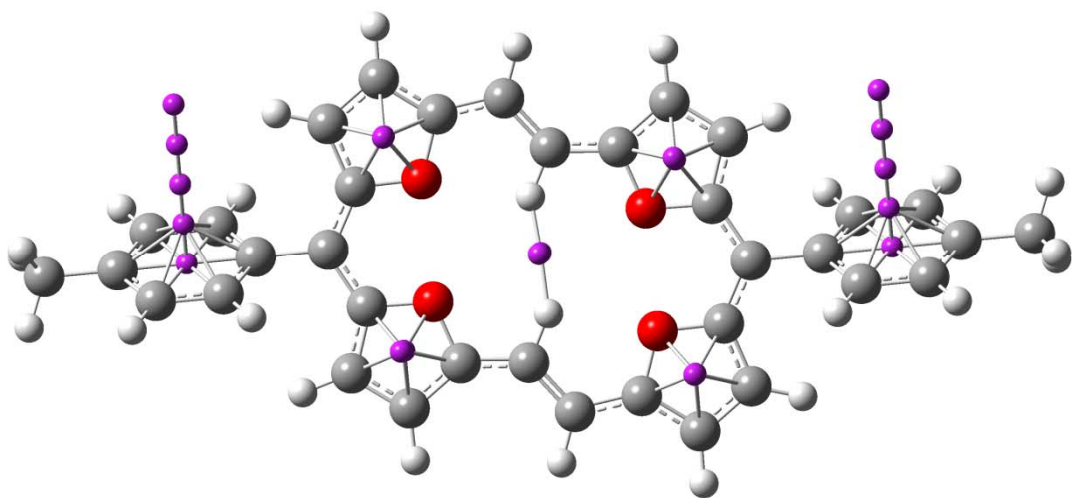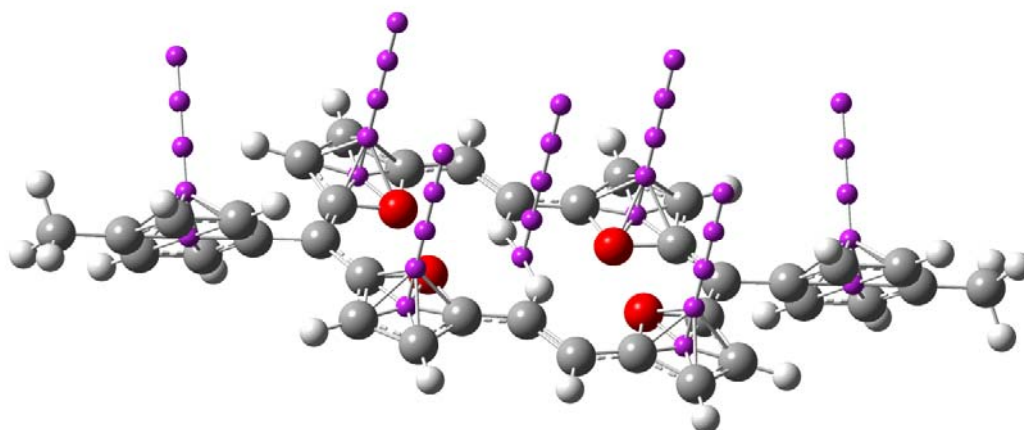

**Figure S31:** When Ghost atoms were placed at the centre of all the individual rings of **12b** with interval of 1 Å, the resulting NICS vs.  $r$  (distance from centre in Å) graphs are shown on the next page (Figure S32).

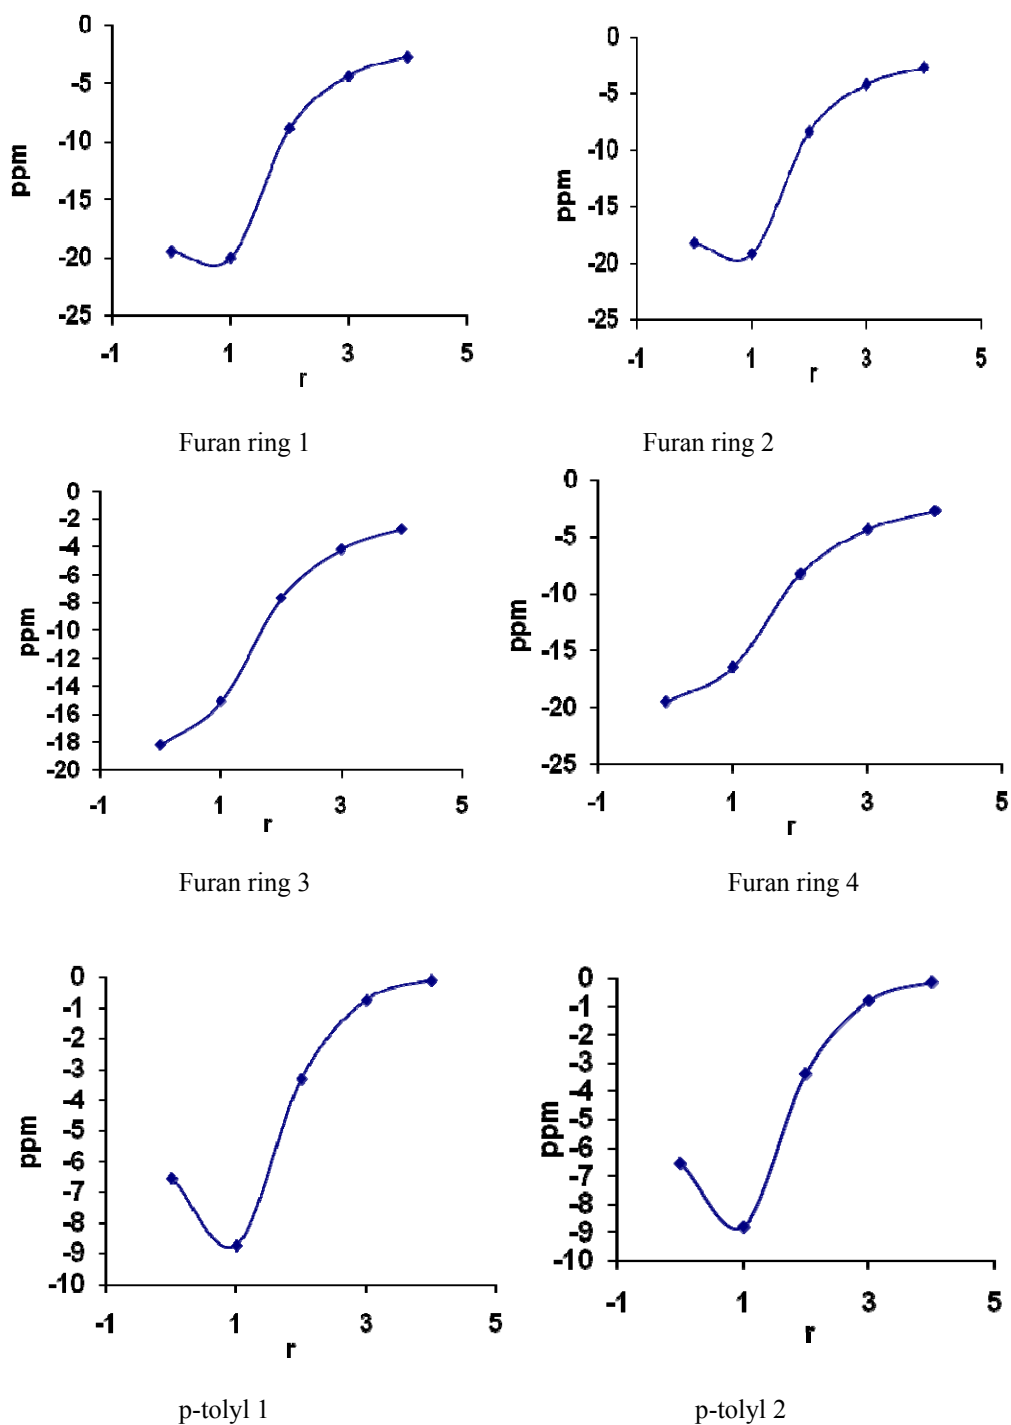

**Figure S32:** Similar to **12a**, as shown above, the two of the furan rings of **12b** (neighboring to the trans double bond) are showing a dip in the NICS (aromaticity) value at 1 Å, and remaining two are not showing. Also the behavior is different from the normal single furan ring alone (which shows no dip at 1 Å). The X-Ray structure corroborates this observation. *p*-Tolyl rings are showing the normal behavior like toluene but with decreased NICS values.

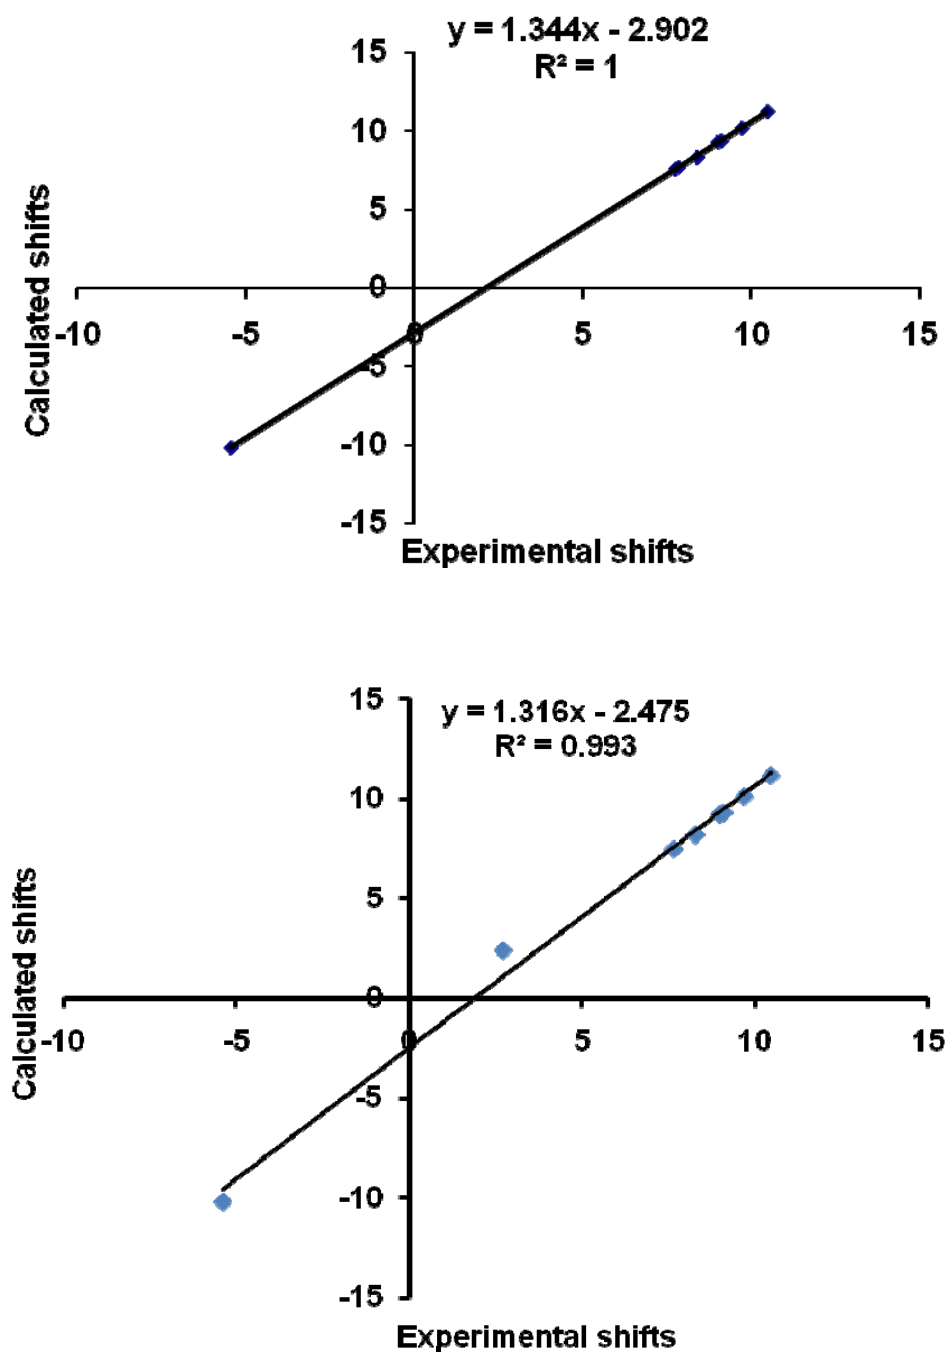

**Figure S33:** Shows the correlation between the  $^1\text{H}$  experimental chemical shifts (ppm) and the calculated chemical shifts (using DFT method and B3LYP/6-311G(d) level) of **12a** (Upper) and **12b** (lower).

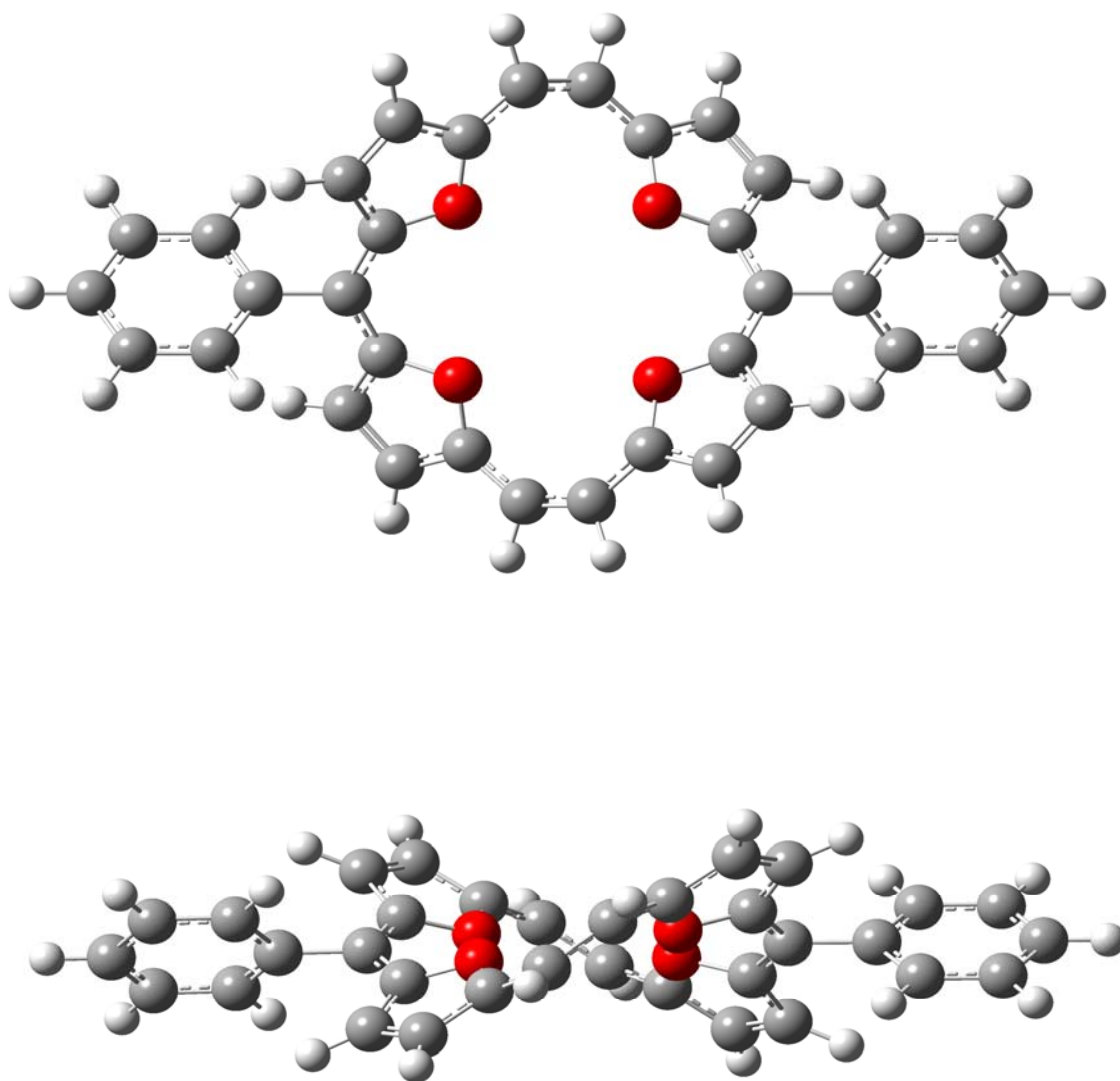

**Figure S34:** Optimized structure of **12a** with *cis, cis* geometry at the two ethylenic links. Top view (upper) and the side view (lower). The side view indicates the loss of planarity due to *cis* configuration of the two double bonds.



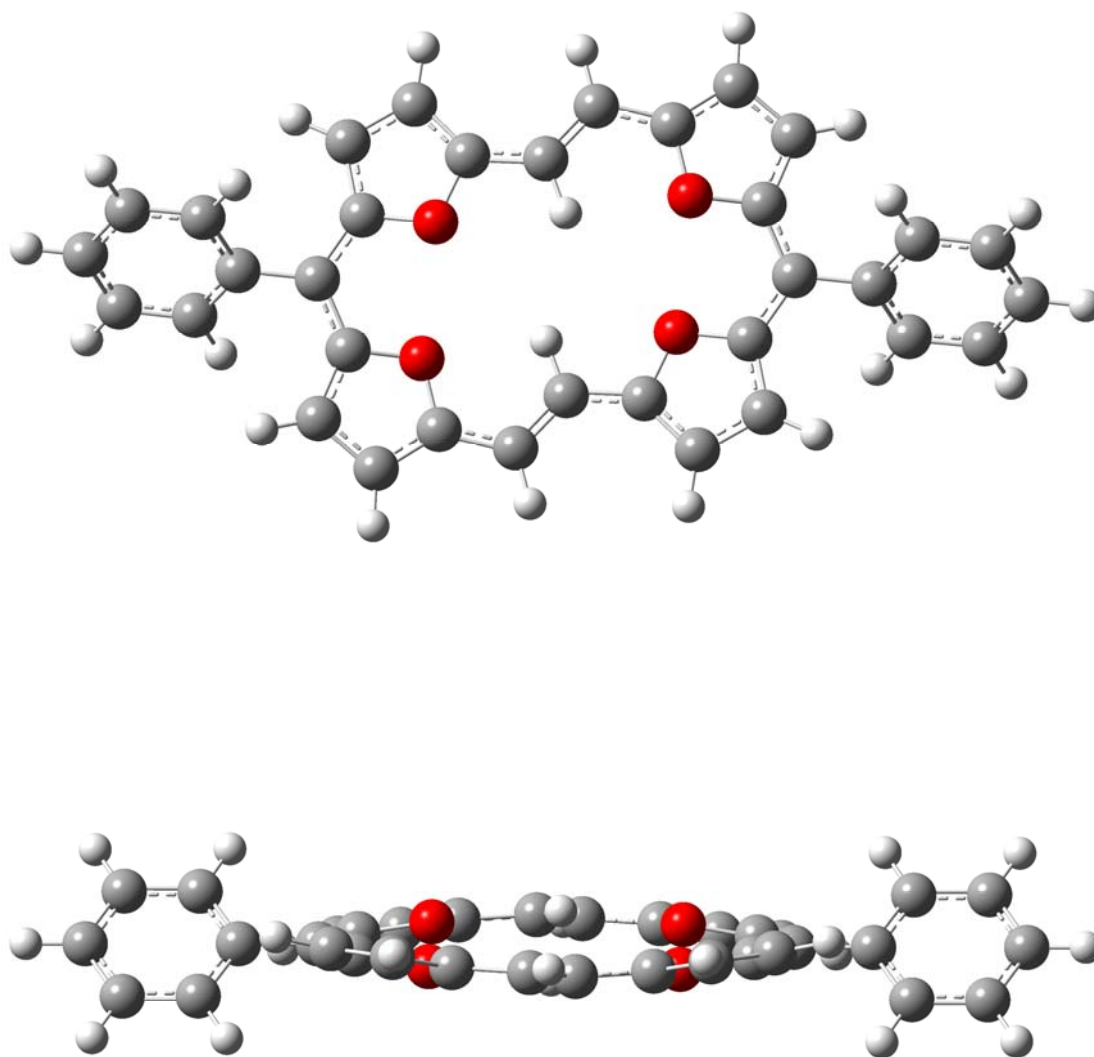

**Figure S35:** Energy minimized structure of antiaromatic dication **13a**. Upper (top view), lower (side view).

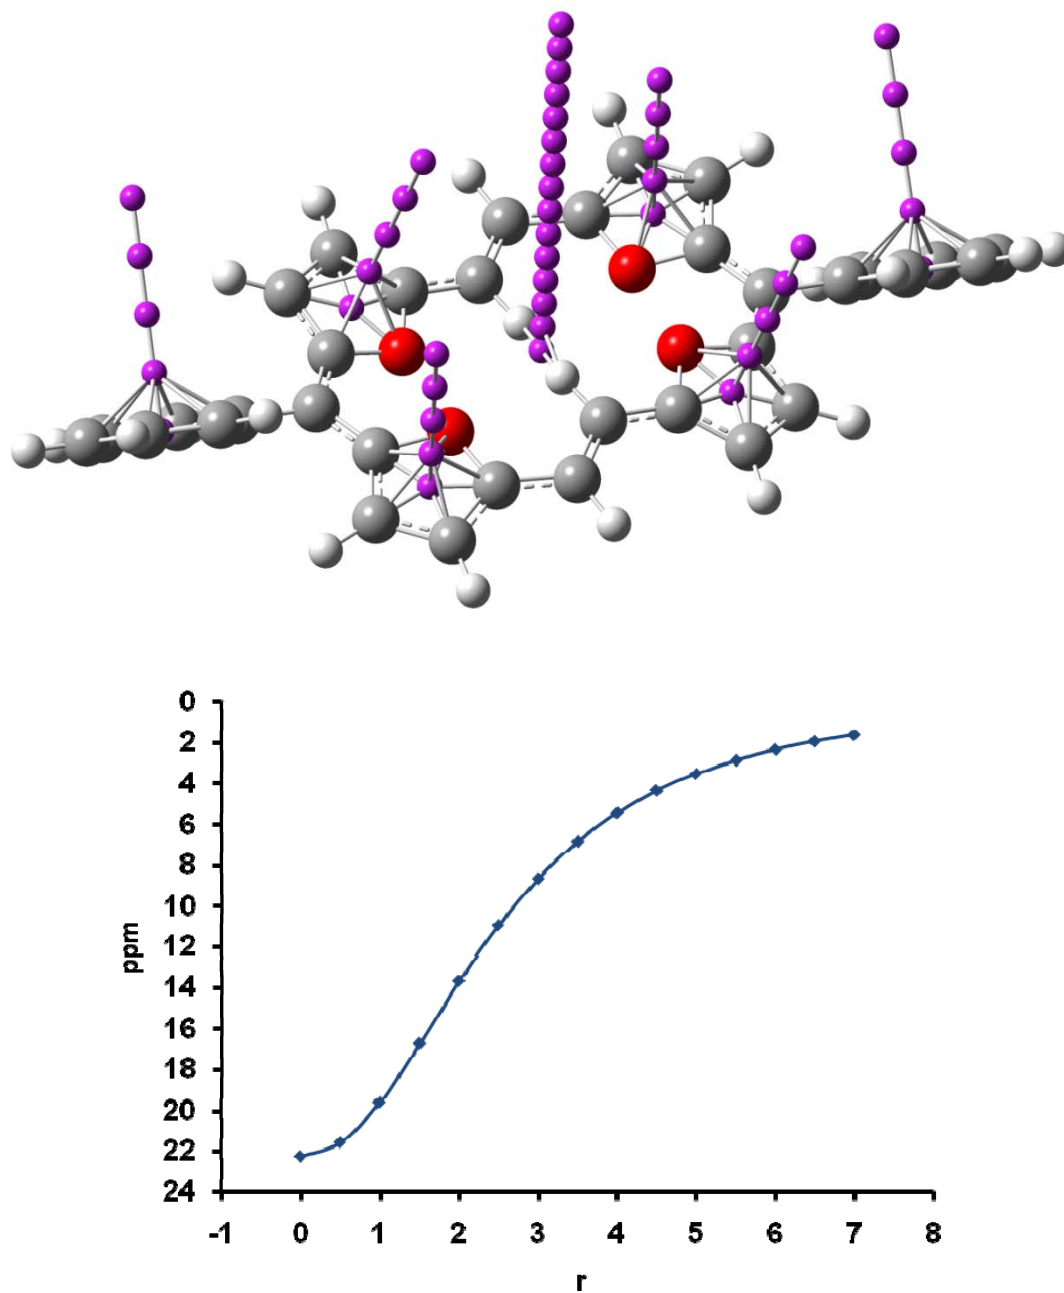

**Figure S36:** Placement of the ghost atoms (at 1 Å intervals) at the centre of all the individual rings as well as the main ring of **13a** (anti aromatic). The +ve NICS values (NICS 1 = 19.59) indicates the antiaromatic behaviour of the dication **13a**. The resulting NICS vs. r (distance from centre in Å) graph is also shown for the main centre of the **13a**. The graphs for the four furan rings are shown (Figure S37). The phenyl groups were showing almost the normal behavior like benzene, so there graphs are not shown.

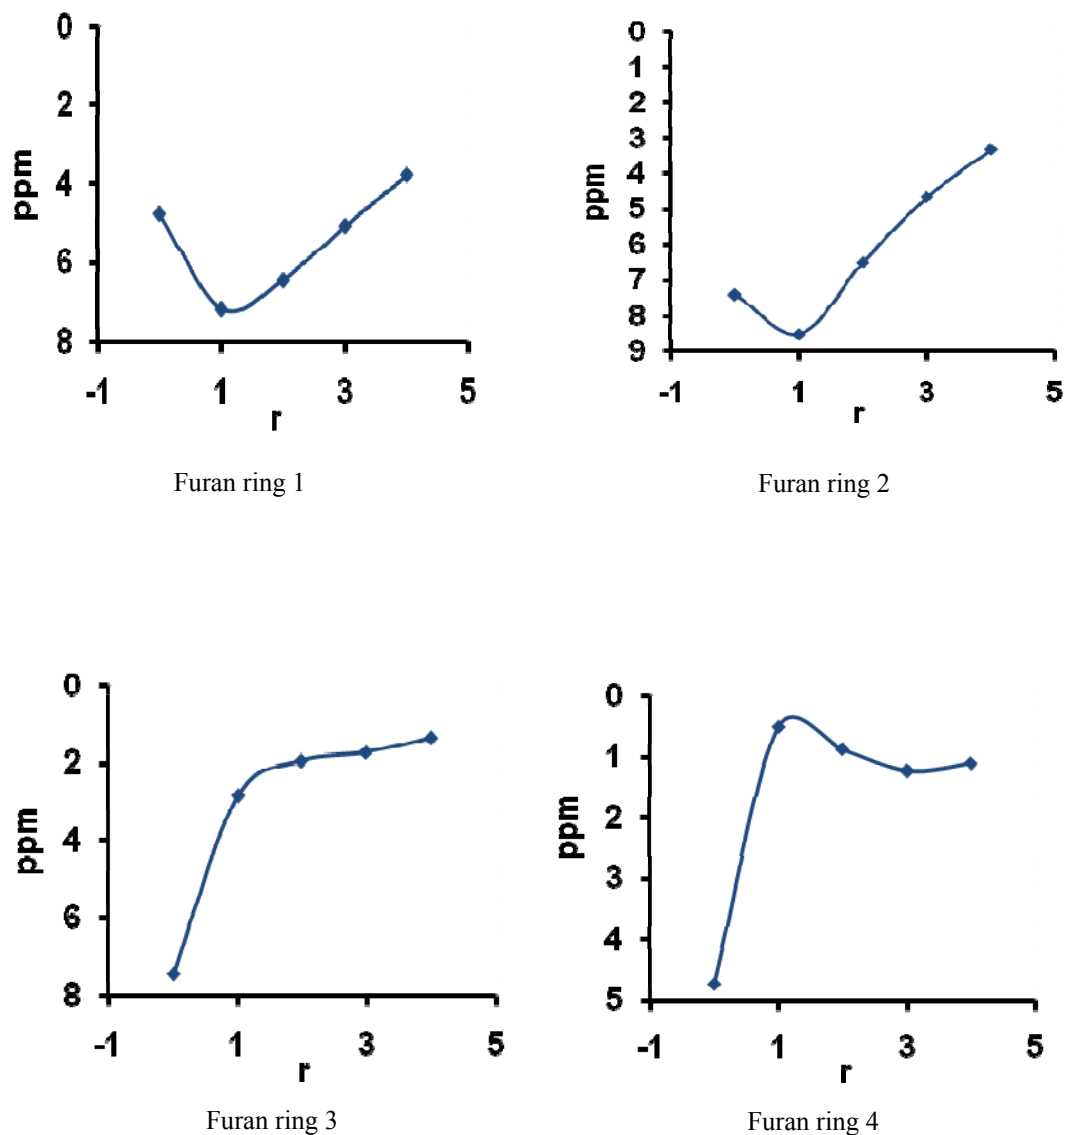

**Figure S37:** Here two furan rings are showing a dip in the +ve (antiaromatic) NICS values at a distance of 1 Å from the centre, compared to the other two furan rings. The latter two furan rings are also slightly non-equivalent as indicated by their NICS vs.  $r$  graphs. Normal furan is aromatic (-ve NICS), but antiaromatic ring current of **13a** made the NICS values of the furan rings as +ve.

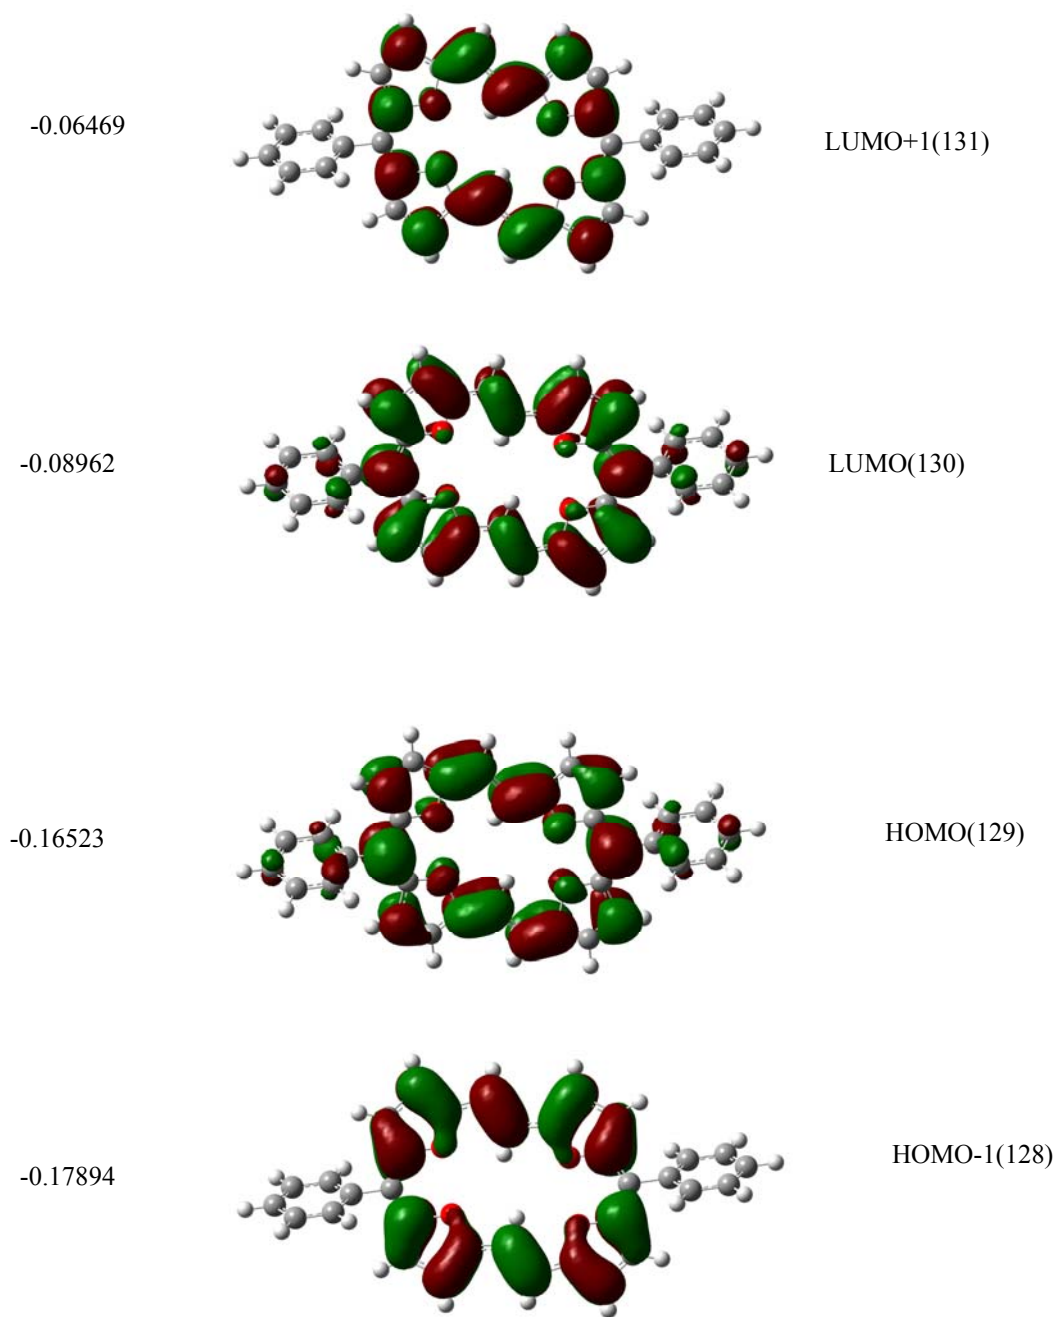

**Figure S38:** HOMO-LUMO and their neighbouring energy levels for **12a** are shown along with their energies (left) in a.u.. HOMO- LUMO levels are showing high degree of delocalisation on the  $[22\pi]$  annulene ring periphery. The energy of HOMO = -0.16523 a.u. and that of LUMO = -0.08962 a.u. .

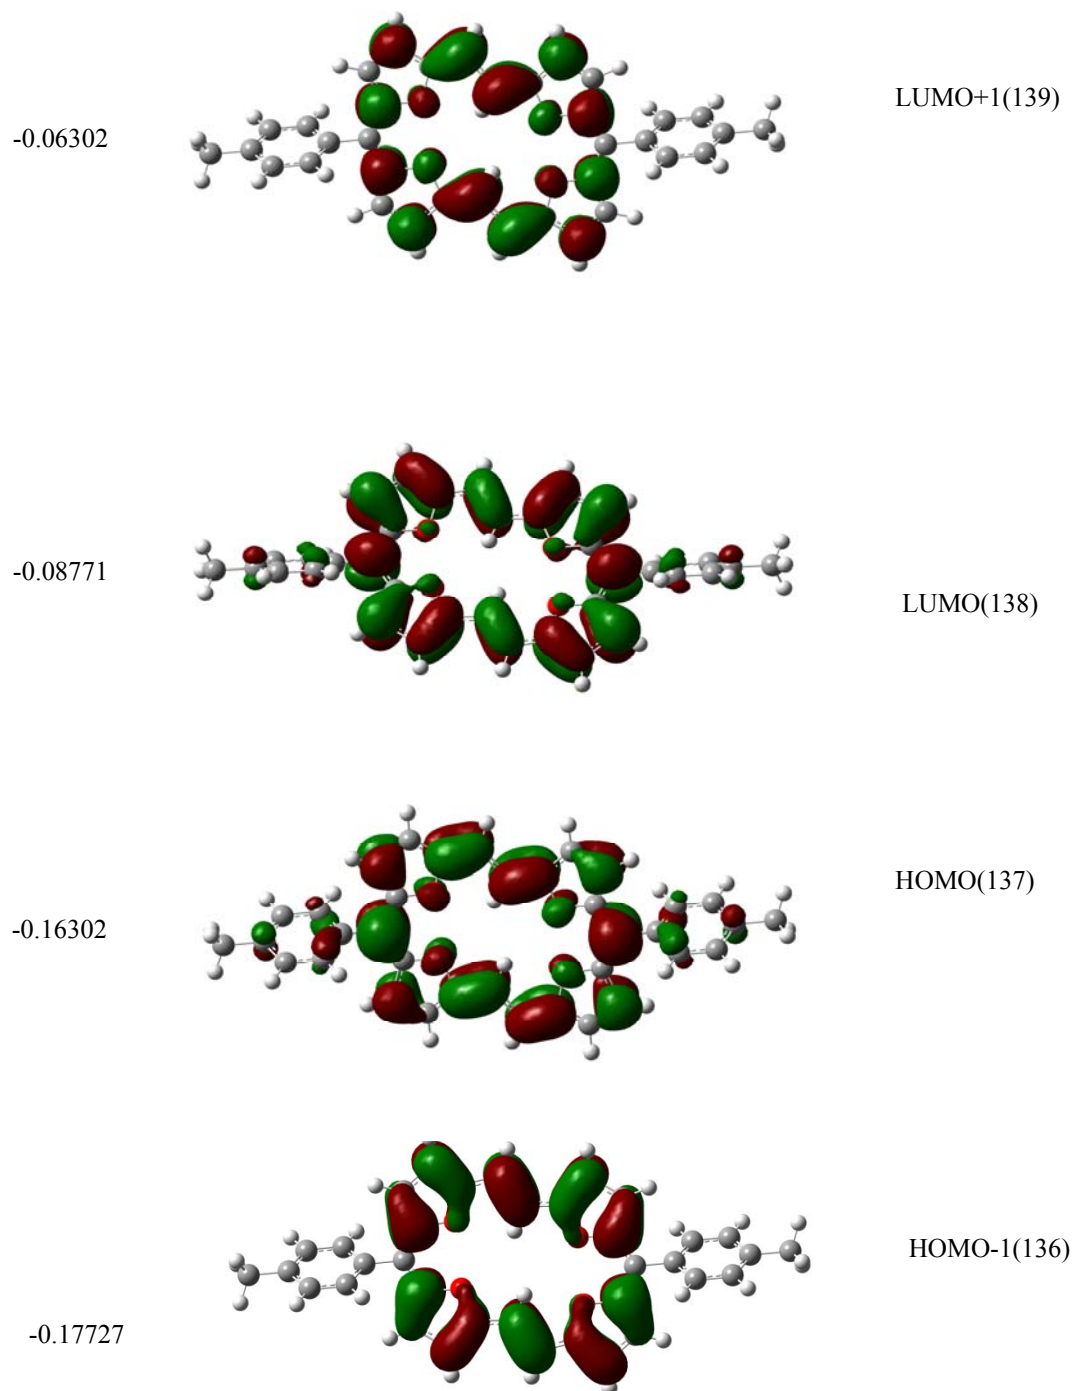

**Figure S39:** HOMO-LUMO and their neighbouring energy levels for **12b** are shown along with their energies (left) in a.u.. HOMO- LUMO levels are showing high degree of delocalisation on the  $[22\pi]$  annulene ring periphery. The energy of HOMO = -0.16302 and that of LUMO = -0.08771

### Cartesian coordinates

**Table S2:** Cartesian coordinates of **12a**

SCF Done: E (RB3LYP) = -1610.02038082 A.U. after 16 cycles

| Center<br>Number | Atomic<br>Number | Atomic<br>Type | Coordinates (Angstroms) |           |           |
|------------------|------------------|----------------|-------------------------|-----------|-----------|
|                  |                  |                | X                       | Y         | Z         |
| 1                | 8                | 0              | 2.438434                | -1.518581 | 0.025317  |
| 2                | 8                | 0              | 2.158495                | 0.996299  | -0.085623 |
| 3                | 6                | 0              | 2.138711                | -2.848425 | -0.099328 |
| 4                | 6                | 0              | 0.777373                | -3.194926 | -0.098275 |
| 5                | 1                | 0              | 0.522511                | -4.243348 | -0.214006 |
| 6                | 6                | 0              | 3.345356                | -3.548389 | -0.245659 |
| 7                | 1                | 0              | 3.439082                | -4.617494 | -0.370613 |
| 8                | 6                | 0              | 4.376148                | -2.614806 | -0.223015 |
| 9                | 1                | 0              | 5.431843                | -2.807876 | -0.333945 |
| 10               | 6                | 0              | 3.792332                | -1.342068 | -0.058220 |
| 11               | 6                | 0              | 4.321883                | -0.039498 | -0.009936 |
| 12               | 6                | 0              | 5.800766                | 0.127811  | 0.002880  |
| 13               | 6                | 0              | 6.586573                | -0.482782 | 0.991756  |
| 14               | 1                | 0              | 6.102421                | -1.067850 | 1.766469  |
| 15               | 6                | 0              | 7.970148                | -0.327109 | 1.002022  |
| 16               | 1                | 0              | 8.558480                | -0.802817 | 1.780452  |
| 17               | 6                | 0              | 8.597114                | 0.445198  | 0.026029  |
| 18               | 1                | 0              | 9.675430                | 0.567589  | 0.035094  |
| 19               | 6                | 0              | 7.829287                | 1.058784  | -0.961803 |
| 20               | 1                | 0              | 8.308680                | 1.655524  | -1.731508 |
| 21               | 6                | 0              | 6.446137                | 0.900124  | -0.974557 |
| 22               | 1                | 0              | 5.856248                | 1.362560  | -1.758798 |
| 23               | 6                | 0              | 3.512820                | 1.113054  | 0.025094  |
| 24               | 6                | 0              | 3.808952                | 2.482636  | 0.200145  |
| 25               | 1                | 0              | 4.797415                | 2.895155  | 0.331332  |
| 26               | 6                | 0              | 2.606590                | 3.176933  | 0.201043  |
| 27               | 1                | 0              | 2.473847                | 4.241659  | 0.326725  |
| 28               | 6                | 0              | 1.576124                | 2.238939  | 0.029677  |
| 29               | 6                | 0              | 0.180582                | 2.204704  | -0.015807 |
| 30               | 1                | 0              | -0.203733               | 1.198024  | -0.137220 |
| 31               | 8                | 0              | -2.438434               | 1.518581  | -0.025319 |
| 32               | 8                | 0              | -2.158495               | -0.996299 | 0.085621  |
| 33               | 6                | 0              | -2.138712               | 2.848425  | 0.099326  |
| 34               | 6                | 0              | -0.777373               | 3.194926  | 0.098272  |

|    |   |   |           |           |           |
|----|---|---|-----------|-----------|-----------|
| 35 | 1 | 0 | -0.522510 | 4.243352  | 0.214006  |
| 36 | 6 | 0 | -3.345356 | 3.548389  | 0.245656  |
| 37 | 1 | 0 | -3.439083 | 4.617494  | 0.370610  |
| 38 | 6 | 0 | -4.376148 | 2.614806  | 0.223013  |
| 39 | 1 | 0 | -5.431846 | 2.807877  | 0.333941  |
| 40 | 6 | 0 | -3.792333 | 1.342069  | 0.058218  |
| 41 | 6 | 0 | -4.321883 | 0.039498  | 0.009936  |
| 42 | 6 | 0 | -5.800766 | -0.127812 | -0.002878 |
| 43 | 6 | 0 | -6.586574 | 0.482783  | -0.991754 |
| 44 | 1 | 0 | -6.102425 | 1.067850  | -1.766463 |
| 45 | 6 | 0 | -7.970148 | 0.327110  | -1.002019 |
| 46 | 1 | 0 | -8.558481 | 0.802820  | -1.780448 |
| 47 | 6 | 0 | -8.597115 | -0.445199 | -0.026026 |
| 48 | 1 | 0 | -9.675424 | -0.567589 | -0.035091 |
| 49 | 6 | 0 | -7.829286 | -1.058787 | 0.961804  |
| 50 | 1 | 0 | -8.308675 | -1.655524 | 1.731504  |
| 51 | 6 | 0 | -6.446136 | -0.900126 | 0.974558  |
| 52 | 1 | 0 | -5.856247 | -1.362564 | 1.758797  |
| 53 | 6 | 0 | -3.512820 | -1.113054 | -0.025092 |
| 54 | 6 | 0 | -3.808951 | -2.482637 | -0.200141 |
| 55 | 1 | 0 | -4.797412 | -2.895155 | -0.331324 |
| 56 | 6 | 0 | -2.606590 | -3.176932 | -0.201041 |
| 57 | 1 | 0 | -2.473847 | -4.241658 | -0.326720 |
| 58 | 6 | 0 | -1.576124 | -2.238938 | -0.029678 |
| 59 | 6 | 0 | -0.180581 | -2.204703 | 0.015805  |
| 60 | 1 | 0 | 0.203734  | -1.198023 | 0.137216  |

---

**Table S3:** Cartesian coordinates of **12b**

SCF Done: E (RB3LYP) = -1688.67114151 A.U. after 17 cycles.

| Center<br>Number | Atomic<br>Number | Atomic<br>Type | Coordinates (Angstroms) |           |           |
|------------------|------------------|----------------|-------------------------|-----------|-----------|
|                  |                  |                | X                       | Y         | Z         |
| 1                | 8                | 0              | 2.414409                | -1.557390 | 0.027290  |
| 2                | 8                | 0              | 2.174728                | 0.961509  | -0.092596 |
| 3                | 6                | 0              | 2.092811                | -2.881945 | -0.098366 |
| 4                | 6                | 0              | 3.287505                | -3.601093 | -0.249496 |
| 5                | 1                | 0              | 3.363467                | -4.671338 | -0.376416 |
| 6                | 6                | 0              | 4.333321                | -2.684205 | -0.229116 |
| 7                | 1                | 0              | 5.385331                | -2.893757 | -0.344116 |
| 8                | 6                | 0              | 3.770846                | -1.402405 | -0.060957 |
| 9                | 6                | 0              | 4.321963                | -0.108601 | -0.012886 |
| 10               | 6                | 0              | 3.530594                | 1.056366  | 0.022474  |
| 11               | 6                | 0              | 3.847749                | 2.420654  | 0.201333  |
| 12               | 1                | 0              | 4.842236                | 2.816839  | 0.336665  |
| 13               | 6                | 0              | 2.656494                | 3.133991  | 0.200737  |
| 14               | 1                | 0              | 2.540217                | 4.200296  | 0.329019  |
| 15               | 6                | 0              | 1.611775                | 2.212827  | 0.024594  |
| 16               | 6                | 0              | 0.215820                | 2.200979  | -0.022012 |
| 17               | 1                | 0              | -0.184695               | 1.200873  | -0.145841 |
| 18               | 6                | 0              | -0.725959               | 3.206263  | 0.095088  |
| 19               | 1                | 0              | -0.453898               | 4.250190  | 0.212762  |
| 20               | 6                | 0              | 5.802576                | 0.034824  | -0.000009 |
| 21               | 6                | 0              | 6.584292                | -0.593342 | 0.978133  |
| 22               | 1                | 0              | 6.098044                | -1.178124 | 1.751930  |
| 23               | 6                | 0              | 7.970072                | -0.456637 | 0.986183  |
| 24               | 1                | 0              | 8.546876                | -0.949818 | 1.763755  |
| 25               | 6                | 0              | 8.629292                | 0.311964  | 0.023572  |
| 26               | 6                | 0              | 10.131920               | 0.451417  | 0.020428  |
| 27               | 1                | 0              | 10.575077               | 0.044189  | 0.931646  |
| 28               | 1                | 0              | 10.438301               | 1.498536  | -0.059491 |
| 29               | 1                | 0              | 10.579110               | -0.078606 | -0.827305 |
| 30               | 6                | 0              | 7.847993                | 0.941856  | -0.952189 |
| 31               | 1                | 0              | 8.330968                | 1.541889  | -1.719039 |
| 32               | 6                | 0              | 6.464829                | 0.805908  | -0.967673 |
| 33               | 1                | 0              | 5.886118                | 1.288513  | -1.748286 |
| 34               | 8                | 0              | -2.414409               | 1.557393  | -0.027304 |
| 35               | 8                | 0              | -2.174727               | -0.961505 | 0.092582  |



|    |   |   |            |           |           |
|----|---|---|------------|-----------|-----------|
| 36 | 6 | 0 | -2.092812  | 2.881948  | 0.098350  |
| 37 | 6 | 0 | -3.287506  | 3.601096  | 0.249479  |
| 38 | 1 | 0 | -3.363468  | 4.671341  | 0.376397  |
| 39 | 6 | 0 | -4.333322  | 2.684207  | 0.229100  |
| 40 | 1 | 0 | -5.385332  | 2.893760  | 0.344099  |
| 41 | 6 | 0 | -3.770846  | 1.402408  | 0.060945  |
| 42 | 6 | 0 | -4.321963  | 0.108603  | 0.012880  |
| 43 | 6 | 0 | -3.530594  | -1.056364 | -0.022477 |
| 44 | 6 | 0 | -3.847751  | -2.420653 | -0.201323 |
| 45 | 1 | 0 | -4.842239  | -2.816839 | -0.336643 |
| 46 | 6 | 0 | -2.656496  | -3.133990 | -0.200731 |
| 47 | 1 | 0 | -2.540220  | -4.200295 | -0.329004 |
| 48 | 6 | 0 | -1.611775  | -2.212824 | -0.024603 |
| 49 | 6 | 0 | -0.215821  | -2.200976 | 0.021996  |
| 50 | 1 | 0 | 0.184695   | -1.200869 | 0.145819  |
| 51 | 6 | 0 | 0.725959   | -3.206260 | -0.095102 |
| 52 | 1 | 0 | 0.453897   | -4.250188 | -0.212772 |
| 53 | 6 | 0 | -5.802576  | -0.034822 | 0.000012  |
| 54 | 6 | 0 | -6.584296  | 0.593325  | -0.978135 |
| 55 | 1 | 0 | -6.098053  | 1.178096  | -1.751944 |
| 56 | 6 | 0 | -7.970077  | 0.456619  | -0.986177 |
| 57 | 1 | 0 | -8.546886  | 0.949786  | -1.763753 |
| 58 | 6 | 0 | -8.629291  | -0.311966 | -0.023548 |
| 59 | 6 | 0 | -10.131917 | -0.451445 | -0.020406 |
| 60 | 1 | 0 | -10.575105 | -0.043938 | -0.931483 |
| 61 | 1 | 0 | -10.438275 | -1.498597 | 0.059188  |
| 62 | 1 | 0 | -10.579094 | 0.078295  | 0.827509  |
| 63 | 6 | 0 | -7.847986  | -0.941835 | 0.952223  |
| 64 | 1 | 0 | -8.330957  | -1.541851 | 1.719090  |
| 65 | 6 | 0 | -6.464823  | -0.805887 | 0.967697  |
| 66 | 1 | 0 | -5.886107  | -1.288474 | 1.748317  |

---

**Table S4:** Cartesian coordinates of **12a (Cis configuration)**:

SCF Done: E(RB3LYP) = -1609.97021900 A.U.

| Center<br>Number | Atomic<br>Number | Atomic<br>Type | Coordinates (Angstroms) |           |           |
|------------------|------------------|----------------|-------------------------|-----------|-----------|
|                  |                  |                | X                       | Y         | Z         |
| 1                | 6                | 0              | 0.560190                | 3.759211  | -0.371480 |
| 2                | 6                | 0              | 1.527620                | 2.833502  | -0.763689 |
| 3                | 6                | 0              | 2.658224                | 3.134540  | -1.543579 |
| 4                | 1                | 0              | 2.796620                | 4.051692  | -2.097524 |
| 5                | 6                | 0              | 3.539219                | 2.083637  | -1.422047 |
| 6                | 1                | 0              | 4.515320                | 1.984555  | -1.869319 |
| 7                | 6                | 0              | 2.942518                | 1.131842  | -0.573509 |
| 8                | 6                | 0              | 3.547597                | 0.003568  | -0.003047 |
| 9                | 6                | 0              | 5.045856                | 0.001987  | -0.016204 |
| 10               | 6                | 0              | 5.758108                | -1.032540 | -0.640515 |
| 11               | 1                | 0              | 5.209932                | -1.833090 | -1.125580 |
| 12               | 6                | 0              | 7.150287                | -1.033108 | -0.657005 |
| 13               | 1                | 0              | 7.682466                | -1.837246 | -1.155547 |
| 14               | 6                | 0              | 7.858559                | -0.002279 | -0.041641 |
| 15               | 1                | 0              | 8.943903                | -0.003882 | -0.051465 |
| 16               | 1                | 0              | 0.842763                | 4.756850  | -0.700039 |
| 17               | 6                | 0              | 0.569206                | -3.753207 | 0.432655  |
| 18               | 6                | 0              | 1.539048                | -2.822255 | 0.806052  |
| 19               | 6                | 0              | 2.679398                | -3.115680 | 1.574577  |
| 20               | 1                | 0              | 2.824773                | -4.027276 | 2.135844  |
| 21               | 6                | 0              | 3.559726                | -2.067147 | 1.429390  |
| 22               | 1                | 0              | 4.542099                | -1.964194 | 1.861844  |
| 23               | 6                | 0              | 2.951469                | -1.122959 | 0.580862  |
| 24               | 6                | 0              | 5.772361                | 1.034240  | 0.595325  |
| 25               | 1                | 0              | 5.235573                | 1.836380  | 1.090384  |
| 26               | 6                | 0              | 7.164623                | 1.030590  | 0.586526  |
| 27               | 1                | 0              | 7.708184                | 1.833029  | 1.075437  |
| 28               | 1                | 0              | 0.853048                | -4.745939 | 0.774614  |
| 29               | 6                | 0              | -0.560194               | -3.759207 | -0.371509 |
| 30               | 6                | 0              | -1.527623               | -2.833492 | -0.763709 |
| 31               | 6                | 0              | -2.658232               | -3.134522 | -1.543595 |
| 32               | 1                | 0              | -2.796631               | -4.051668 | -2.097549 |
| 33               | 6                | 0              | -3.539227               | -2.083622 | -1.422044 |
| 34               | 1                | 0              | -4.515333               | -1.984536 | -1.869306 |
| 35               | 6                | 0              | -2.942520               | -1.131834 | -0.573503 |

|    |   |   |           |           |           |
|----|---|---|-----------|-----------|-----------|
| 36 | 6 | 0 | -3.547596 | -0.003567 | -0.003023 |
| 37 | 6 | 0 | -5.045855 | -0.001989 | -0.016164 |
| 38 | 6 | 0 | -5.772351 | -1.034242 | 0.595375  |
| 39 | 1 | 0 | -5.235554 | -1.836379 | 1.090430  |
| 40 | 6 | 0 | -7.164612 | -1.030596 | 0.586592  |
| 41 | 1 | 0 | -7.708165 | -1.833035 | 1.075512  |
| 42 | 6 | 0 | -7.858558 | 0.002270  | -0.041569 |
| 43 | 1 | 0 | -8.943902 | 0.003870  | -0.051381 |
| 44 | 1 | 0 | -0.842773 | -4.756845 | -0.700066 |
| 45 | 6 | 0 | -0.569207 | 3.753207  | 0.432688  |
| 46 | 6 | 0 | -1.539045 | 2.822251  | 0.806086  |
| 47 | 6 | 0 | -2.679391 | 3.115669  | 1.574620  |
| 48 | 1 | 0 | -2.824763 | 4.027260  | 2.135896  |
| 49 | 6 | 0 | -3.559720 | 2.067138  | 1.429428  |
| 50 | 1 | 0 | -4.542091 | 1.964182  | 1.861885  |
| 51 | 6 | 0 | -2.951467 | 1.122956  | 0.580890  |
| 52 | 6 | 0 | -5.758117 | 1.032535  | -0.640469 |
| 53 | 1 | 0 | -5.209948 | 1.833086  | -1.125542 |
| 54 | 6 | 0 | -7.150296 | 1.033099  | -0.656944 |
| 55 | 1 | 0 | -7.682482 | 1.837235  | -1.155481 |
| 56 | 1 | 0 | -0.853052 | 4.745938  | 0.774646  |
| 57 | 8 | 0 | -1.680346 | -1.573512 | -0.233431 |
| 58 | 8 | 0 | 1.685025  | -1.567674 | 0.261377  |
| 59 | 8 | 0 | 1.680346  | 1.573517  | -0.233424 |
| 60 | 8 | 0 | -1.685024 | 1.567674  | 0.261402  |

---

**Table S5:** Cartesian coordinates of **13a**:

SCF Done: E(RB3LYP) = -1609.49784641 A.U. after 17 cycles

| Center Number | Atomic Number | Atomic Type | Coordinates (Angstroms) |           |           |
|---------------|---------------|-------------|-------------------------|-----------|-----------|
|               |               |             | X                       | Y         | Z         |
| 1             | 8             | 0           | -2.450962               | -1.489983 | -0.141256 |
| 2             | 8             | 0           | -2.198629               | 1.008503  | 0.261604  |
| 3             | 6             | 0           | -2.135339               | -2.786123 | 0.067461  |
| 4             | 6             | 0           | -0.736611               | -3.125623 | 0.036868  |
| 5             | 1             | 0           | -0.473410               | -4.150639 | 0.272862  |
| 6             | 6             | 0           | -3.286072               | -3.502770 | 0.376005  |
| 7             | 1             | 0           | -3.341225               | -4.556883 | 0.601999  |
| 8             | 6             | 0           | -4.340959               | -2.581761 | 0.375340  |
| 9             | 1             | 0           | -5.371973               | -2.779633 | 0.623924  |
| 10            | 6             | 0           | -3.800008               | -1.331947 | 0.056851  |
| 11            | 6             | 0           | -4.358690               | -0.028991 | 0.022419  |
| 12            | 6             | 0           | -5.810786               | 0.121763  | -0.005751 |
| 13            | 6             | 0           | -6.600084               | -0.697366 | -0.844246 |
| 14            | 1             | 0           | -6.122265               | -1.406532 | -1.510147 |
| 15            | 6             | 0           | -7.977265               | -0.541473 | -0.879124 |
| 16            | 1             | 0           | -8.571946               | -1.152525 | -1.548344 |
| 17            | 6             | 0           | -8.595872               | 0.409298  | -0.063973 |
| 18            | 1             | 0           | -9.674135               | 0.520758  | -0.086320 |
| 19            | 6             | 0           | -7.829963               | 1.217021  | 0.780410  |
| 20            | 1             | 0           | -8.314551               | 1.939030  | 1.427535  |
| 21            | 6             | 0           | -6.449814               | 1.088285  | 0.803164  |
| 22            | 1             | 0           | -5.864894               | 1.687415  | 1.491335  |
| 23            | 6             | 0           | -3.540446               | 1.131564  | 0.015836  |
| 24            | 6             | 0           | -3.801922               | 2.469165  | -0.301908 |
| 25            | 1             | 0           | -4.761162               | 2.876929  | -0.580843 |
| 26            | 6             | 0           | -2.584045               | 3.156108  | -0.252363 |
| 27            | 1             | 0           | -2.422370               | 4.202163  | -0.463262 |
| 28            | 6             | 0           | -1.614126               | 2.218299  | 0.086125  |
| 29            | 6             | 0           | -0.186149               | 2.163336  | 0.198938  |
| 30            | 1             | 0           | 0.177403                | 1.171500  | 0.442341  |
| 31            | 8             | 0           | 2.450920                | 1.489965  | 0.140936  |
| 32            | 8             | 0           | 2.198649                | -1.008511 | -0.261905 |
| 33            | 6             | 0           | 2.135352                | 2.786140  | -0.067646 |
| 34            | 6             | 0           | 0.736561                | 3.125681  | -0.037077 |
| 35            | 1             | 0           | 0.473465                | 4.150734  | -0.272892 |
| 36            | 6             | 0           | 3.286140                | 3.502799  | -0.375962 |
| 37            | 1             | 0           | 3.341346                | 4.556935  | -0.601837 |
| 38            | 6             | 0           | 4.340999                | 2.581752  | -0.375261 |
| 39            | 1             | 0           | 5.372130                | 2.779666  | -0.623701 |
| 40            | 6             | 0           | 3.800004                | 1.331951  | -0.056951 |
| 41            | 6             | 0           | 4.358713                | 0.028951  | -0.022469 |
| 42            | 6             | 0           | 5.810798                | -0.121785 | 0.005970  |
| 43            | 6             | 0           | 6.599968                | 0.697465  | 0.844462  |
| 44            | 1             | 0           | 6.122045                | 1.406722  | 1.510220  |
| 45            | 6             | 0           | 7.977145                | 0.541603  | 0.879551  |
| 46            | 1             | 0           | 8.571722                | 1.152746  | 1.548778  |
| 47            | 6             | 0           | 8.595881                | -0.409249 | 0.064593  |
| 48            | 1             | 0           | 9.674147                | -0.520685 | 0.087094  |
| 49            | 6             | 0           | 7.830094                | -1.217083 | -0.779795 |
| 50            | 1             | 0           | 8.314775                | -1.939155 | -1.426780 |
| 51            | 6             | 0           | 6.449947                | -1.088381 | -0.802731 |
| 52            | 1             | 0           | 5.865132                | -1.687615 | -1.490903 |
| 53            | 6             | 0           | 3.540450                | -1.131610 | -0.016054 |
| 54            | 6             | 0           | 3.801867                | -2.469233 | 0.301661  |

|    |   |   |           |           |           |
|----|---|---|-----------|-----------|-----------|
| 55 | 1 | 0 | 4.761072  | -2.877022 | 0.580638  |
| 56 | 6 | 0 | 2.584001  | -3.156141 | 0.252019  |
| 57 | 1 | 0 | 2.422299  | -4.202196 | 0.462881  |
| 58 | 6 | 0 | 1.614101  | -2.218313 | -0.086488 |
| 59 | 6 | 0 | 0.186129  | -2.163334 | -0.199325 |
| 60 | 1 | 0 | -0.177411 | -1.171516 | -0.442897 |

---

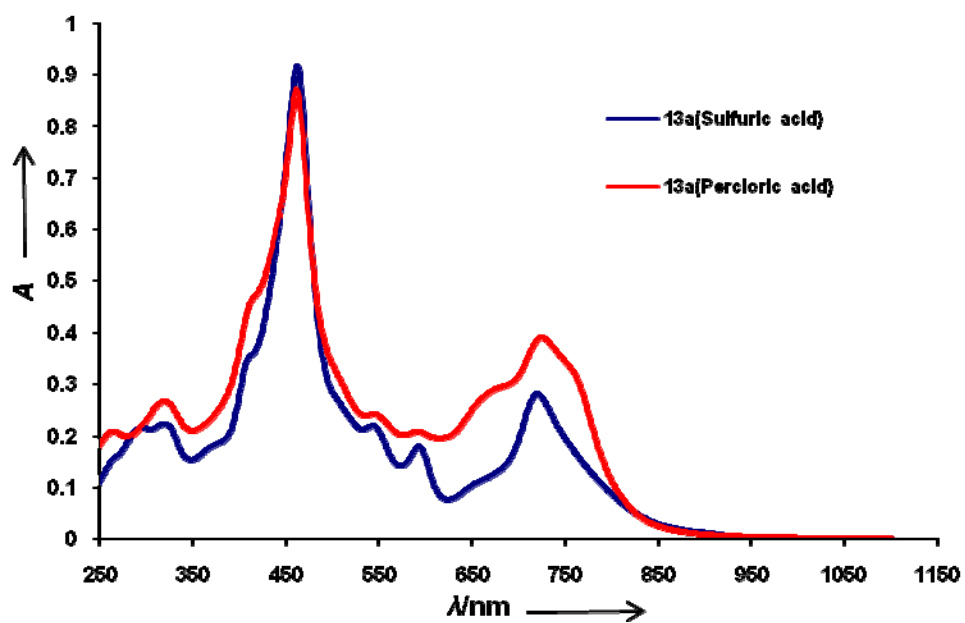

Figure S40: UV-Vis. spectra of **13a** in H<sub>2</sub>SO<sub>4</sub> and HClO<sub>4</sub>.

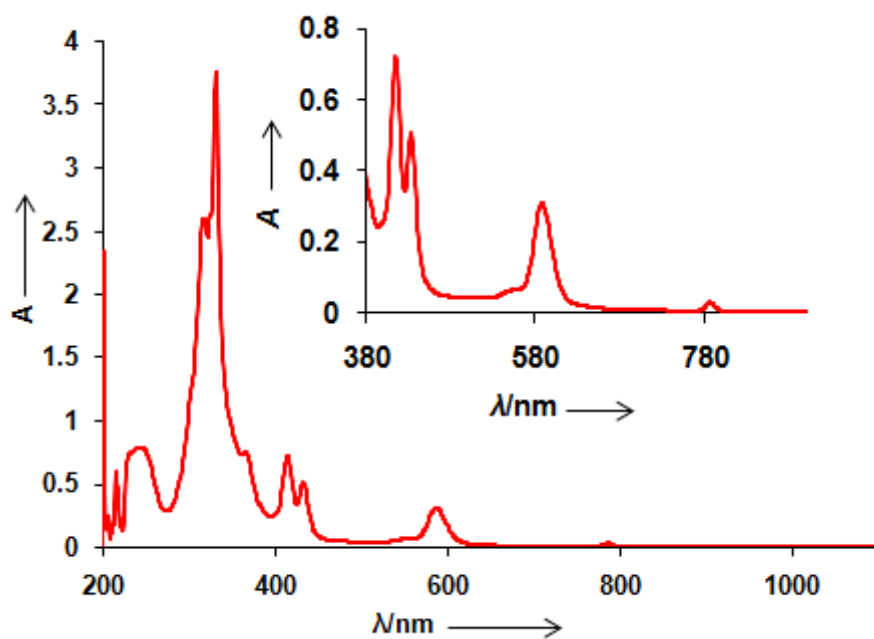

Figure S41: Partial auto-oxidation of **11a** to **12a** (UV-Vis. spectra is showing the presence of both the **11a** as well as traces of **12a**)

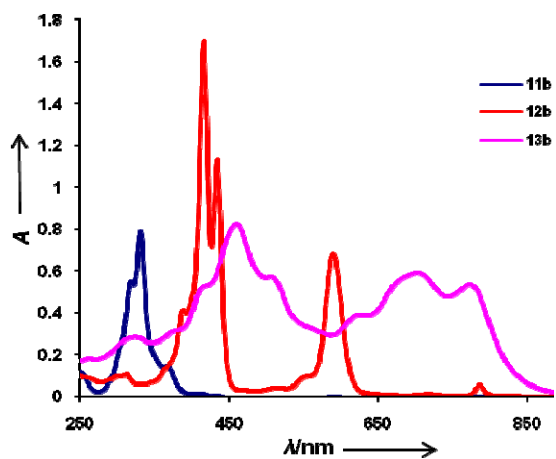

Figure S42a: UV-Vis. spectra of **11b** (DCM), **12b** (DCM) and **13b** (HClO<sub>4</sub>).

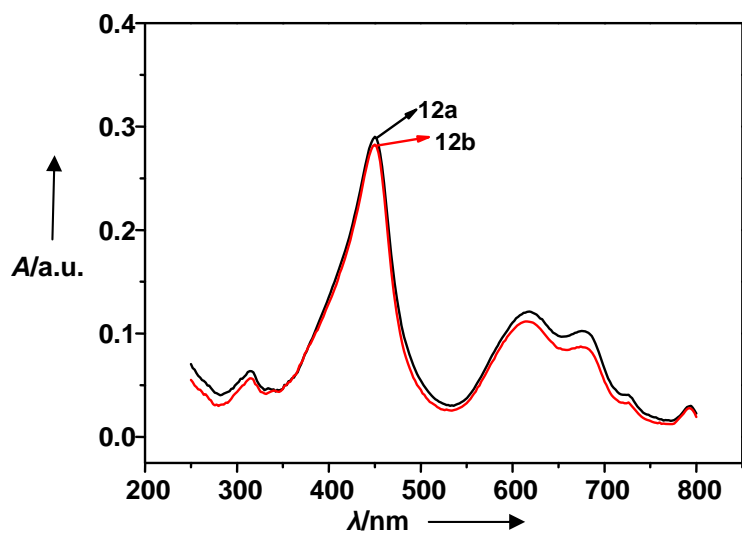

Figure S42b: Normalized UV-vis absorption spectra of thin films of **12a** and **12b** at room temperature.

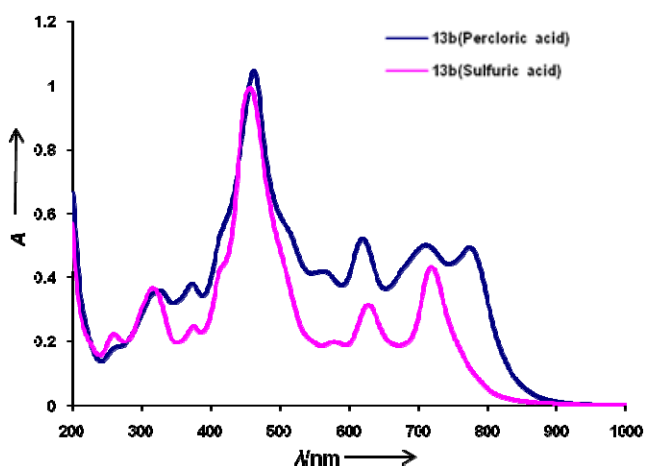

Figure S43: UV-Vis. spectra of **13b** in H<sub>2</sub>SO<sub>4</sub> and HClO<sub>4</sub>.

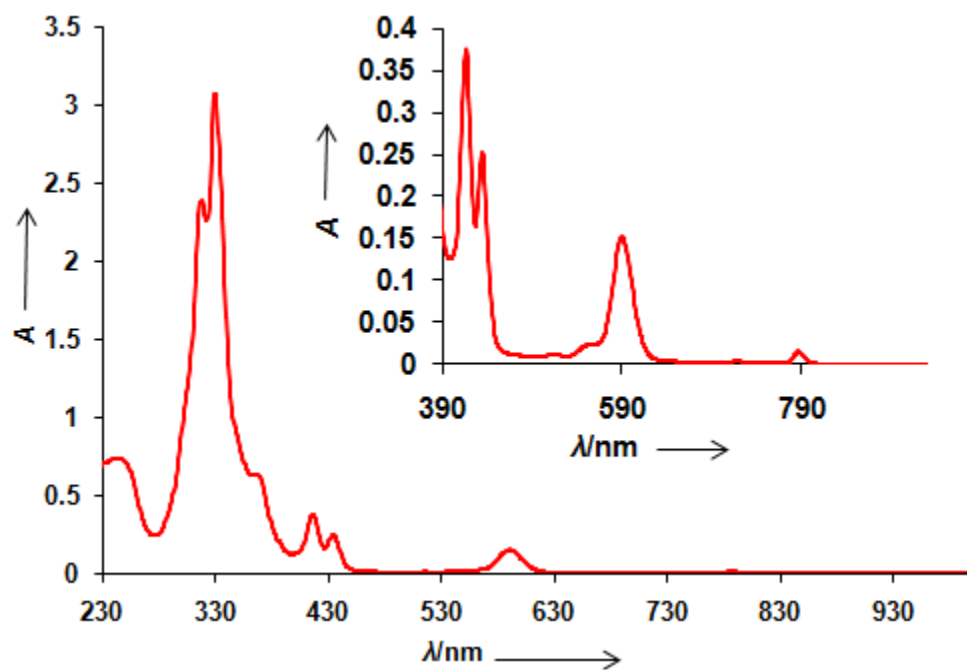

**Figure S44:** Partial auto-oxidation of **11b** to **12b** (UV-Vis. spectra is showing the presence of both the **11b** as well as traces of **12b**)



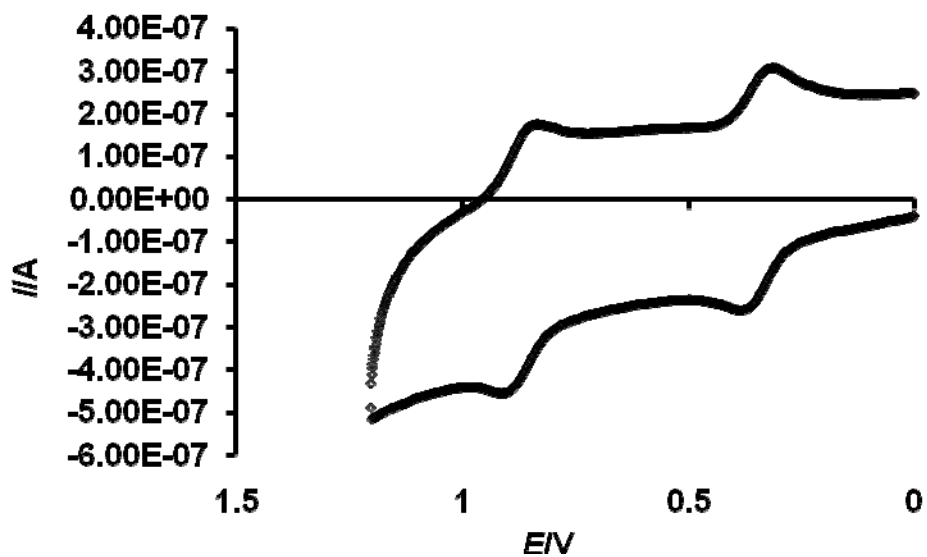

**Figure S45:** Cyclic voltammogram (CV) for **12b** (DCM, electrolyte TBAPF<sub>6</sub>; working electrode: Pt; ref. electrode: Ag/AgCl; Scan rate 100 mV s<sup>-1</sup>).

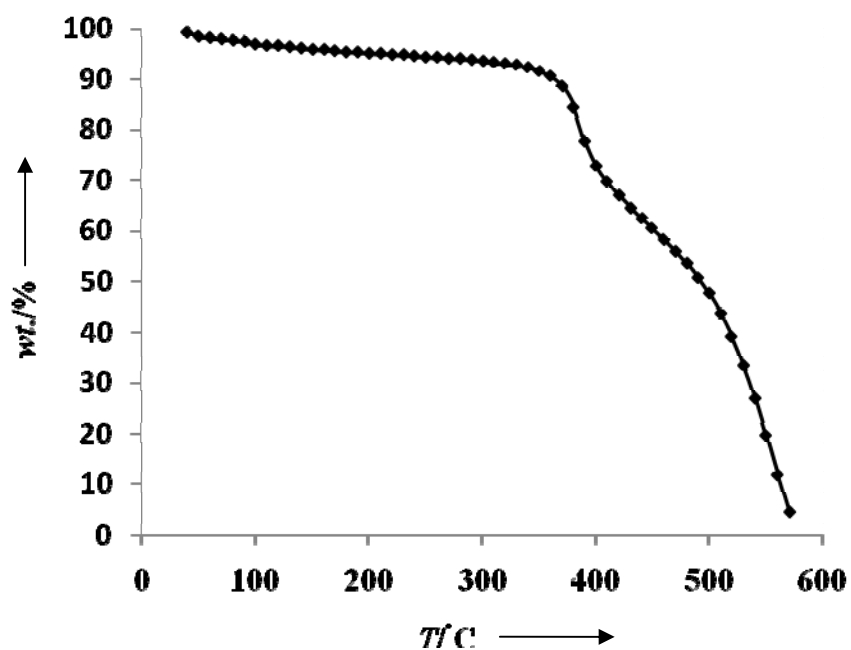

**Figure S46:** TGA Analysis of **12a** under N<sub>2</sub> with temperature rise of 10 °C per minute. Thus **12a** is highly stable as it is having a high thermal decomposition temp. of about 374 °C.

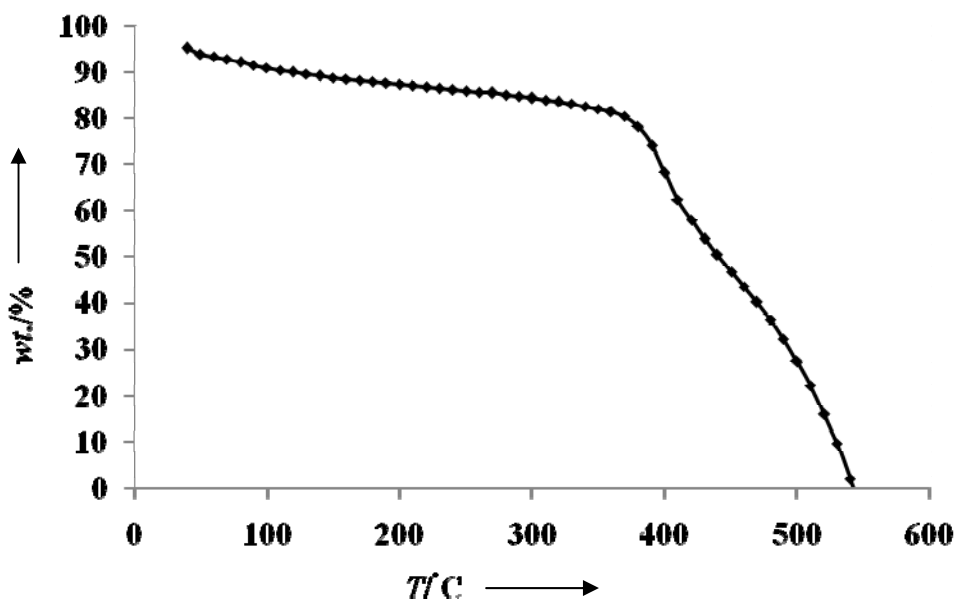

**Figure S47:** TGA Analysis of **12b** under N<sub>2</sub> with temperature rise of 10 °C per minute. Thus **12b** is highly stable as it is having a high onset thermal decomposition temp. of about 380 °C.

### X-Ray Diffraction Analysis of 12a:

Single crystals of **12a** suitable for an X-Ray crystal structure determination were grown in a dark, quiet and undisturbed place from dry DCM with a toluene layer upon it (2 weeks).

**Table S6:** The crystallographic data for **12a**.

|                                   |                                                                                                                       |
|-----------------------------------|-----------------------------------------------------------------------------------------------------------------------|
| Empirical formula                 | C <sub>34</sub> H <sub>22</sub> O <sub>4</sub>                                                                        |
| Formula weight                    | 494.52                                                                                                                |
| Temperature                       | 293(2) K                                                                                                              |
| Wavelength                        | 0.71073 Å                                                                                                             |
| Crystal system, space group       | Monoclinic, P 21/c                                                                                                    |
| Unit cell dimensions              | a = 13.091(3) Å    alpha = 90 deg.<br>b = 9.1718(12) Å    beta = 107.03(2) deg.<br>c = 10.744(2) Å    gamma = 90 deg. |
| Volume                            | 1233.5(4) Å <sup>3</sup>                                                                                              |
| Z, Calculated density             | 2, 1.331 Mg/m <sup>3</sup>                                                                                            |
| Absorption coefficient            | 0.087 mm <sup>-1</sup>                                                                                                |
| F(000)                            | 516                                                                                                                   |
| Crystal size                      | 0.34 x 0.32 x 0.28 mm                                                                                                 |
| Theta range for data collection   | 3.66 to 25.00 deg.                                                                                                    |
| Limiting indices                  | -15<=h<=11, -10<=k<=10, -12<=l<=12                                                                                    |
| Reflections collected / unique    | 8079 / 2158 [R(int) = 0.0495]                                                                                         |
| Completeness to theta = 25.00     | 99.8 %                                                                                                                |
| Absorption correction             | Semi-empirical from equivalents                                                                                       |
| Max. and min. transmission        | 0.9761 and 0.9711                                                                                                     |
| Refinement method                 | Full-matrix least-squares on F <sup>2</sup>                                                                           |
| Data / restraints / parameters    | 2158 / 0 / 172                                                                                                        |
| Goodness-of-fit on F <sup>2</sup> | 0.852                                                                                                                 |
| Final R indices [I>2sigma(I)]     | R1 = 0.0356, wR2 = 0.0723                                                                                             |
| R indices (all data)              | R1 = 0.0641, wR2 = 0.0781                                                                                             |
| Largest diff. peak and hole       | 0.100 and -0.149 e.Å <sup>-3</sup>                                                                                    |

The crystal structure has been deposited at the Cambridge Crystallographic Data Centre (CCDC 825048). The data can be obtained free of charge via the Internet at [www.ccdc.cam.ac.uk/data\\_request/cif](http://www.ccdc.cam.ac.uk/data_request/cif).

### X-Ray Diffraction Analysis of **12b**:

Single crystals of **12b** suitable for an X-Ray crystal structure determination were grown in a dark, quiet and undisturbed place from o-dichlorobenzene (10 days).

A)

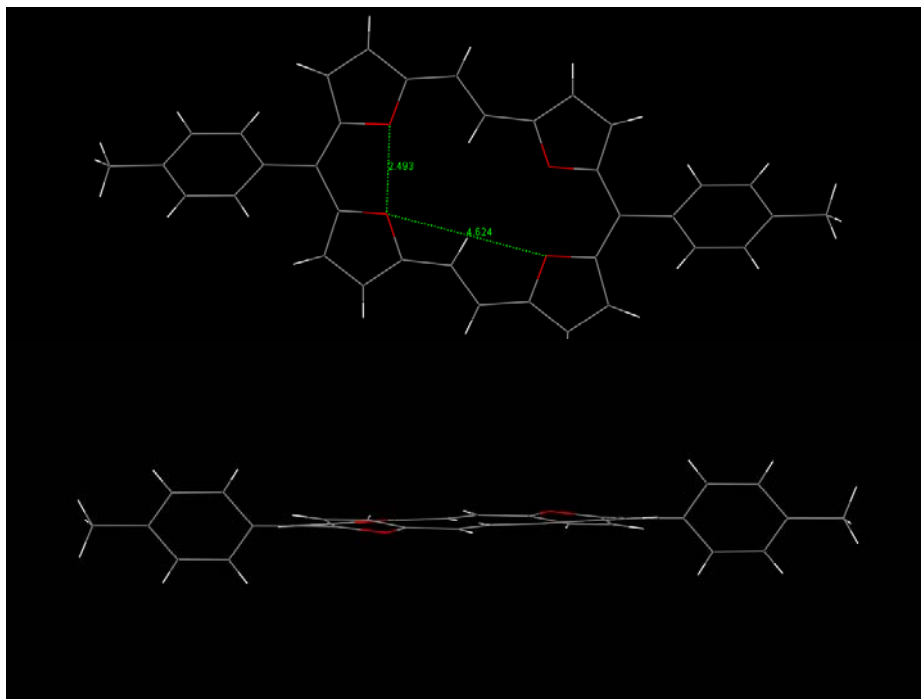

B)

**Figure S48:** Crystal structure of **12b** (a) molecular structure showing distances between oxygen atoms in the crystal. (b) Side view .

**Table S7:** The crystallographic data for **12b**.

---

|                                   |                                                                                                               |
|-----------------------------------|---------------------------------------------------------------------------------------------------------------|
| Empirical formula                 | C <sub>36</sub> H <sub>26</sub> O <sub>4</sub>                                                                |
| Formula weight                    | 522.57                                                                                                        |
| Temperature                       | 293(2) K                                                                                                      |
| Wavelength                        | 0.71073 Å                                                                                                     |
| Crystal system, space group       | Orthorhombic, P b c a                                                                                         |
| Unit cell dimensions              | a = 34.541(2) Å    alpha = 90 deg.<br>b = 9.5379(7) Å    beta = 90 deg.<br>c = 7.8246(6) Å    gamma = 90 deg. |
| Volume                            | 2577.8(3) Å <sup>3</sup>                                                                                      |
| Z, Calculated density             | 4, 1.347 Mg/m <sup>3</sup>                                                                                    |
| Absorption coefficient            | 0.087 mm <sup>-1</sup>                                                                                        |
| F(000)                            | 1096                                                                                                          |
| Crystal size                      | 0.21 x 0.17 x 0.13 mm                                                                                         |
| Theta range for data collection   | 3.42 to 25.00 deg.                                                                                            |
| Limiting indices                  | -41 ≤ h ≤ 41, -10 ≤ k ≤ 11, -9 ≤ l ≤ 9                                                                        |
| Reflections collected / unique    | 17815 / 2270 [R(int) = 0.0975]                                                                                |
| Completeness to theta = 25.00     | 99.8 %                                                                                                        |
| Absorption correction             | Semi-empirical from equivalents                                                                               |
| Max. and min. transmission        | 0.9888 and 0.9820                                                                                             |
| Refinement method                 | Full-matrix least-squares on F <sup>2</sup>                                                                   |
| Data / restraints / parameters    | 2270 / 0 / 182                                                                                                |
| Goodness-of-fit on F <sup>2</sup> | 0.813                                                                                                         |
| Final R indices [I > 2 sigma(I)]  | R1 = 0.0418, wR2 = 0.0776                                                                                     |
| R indices (all data)              | R1 = 0.1091, wR2 = 0.0872                                                                                     |
| Largest diff. peak and hole       | 0.149 and -0.122 e.Å <sup>-3</sup>                                                                            |

---

The crystal structure has been deposited at the Cambridge Crystallographic Data Centre (CCDC 825049). The data can be obtained free of charge via the Internet at [www.ccdc.cam.ac.uk/data\\_request/cif](http://www.ccdc.cam.ac.uk/data_request/cif).

## Thin film transistors of compounds **12a** and **12b**.

### Experimental details

OFET devices were fabricated in the top-contact device configuration. The substrate was heavily doped, n-type Si gate electrode with a 500 nm thick SiO<sub>2</sub> layer as the gate dielectric. The gate dielectric was treated with octadecyltrichlorosilane (OTS) or PMMA (Polymethyl methacrylate) by vapour deposition method. Subsequently, organic semiconductors were deposited on the substrate by thermal evaporation under a pressure of  $8 \times 10^{-4}$  Pa at a deposition rate gradually increased from  $0.1 \text{ \AA s}^{-1}$  to  $0.4 \text{ \AA s}^{-1}$  at the first 20 nm and then maintained  $0.5 \text{ \AA s}^{-1}$  until the thickness of the film was 50 nm. The deposition rate and film thickness were monitored by a quartz crystal microbalance (ULVAC CRTM-6000). Finally, 20 nm thick gold source and drain electrode were deposited through a shadow mask. The channel length (*L*) and width (*W*) were 0.11 mm and 5.30 mm, respectively. The FET characteristics were measured at room temperature in air using Keithley 4200 SCS. Atomic force microscopy (AFM) measurements were carried out with a Nanoscope IIIa instrument (Digital Instruments) operating in tapping mode. UV-Vis spectra were recorded on a JASCO V-570 spectrometer.

### FET characteristics

Top contact OFETs based on the thin films were fabricated. The results are summarized in Table 1 of the manuscript. Here, the mobilities ( $\mu$ ) were calculated in the saturation regime by the following equation:  $I_D = \mu C_i (W/2L)(V_G - V_T)^2$ , where  $I_D$  is the drain current,  $\mu$  is the field-effect mobility,  $C_i$  is the gate dielectric capacitance,  $W$  and  $L$  are the channel width and length, respectively,  $V_T$  is the threshold voltage. **12a** deposited at 60 °C exhibited the best OFET performance ( $0.4 \text{ cm}^2 \text{ V}^{-1} \text{ s}^{-1}$ ). The FET characteristics of **12a** and **12b** are shown below.

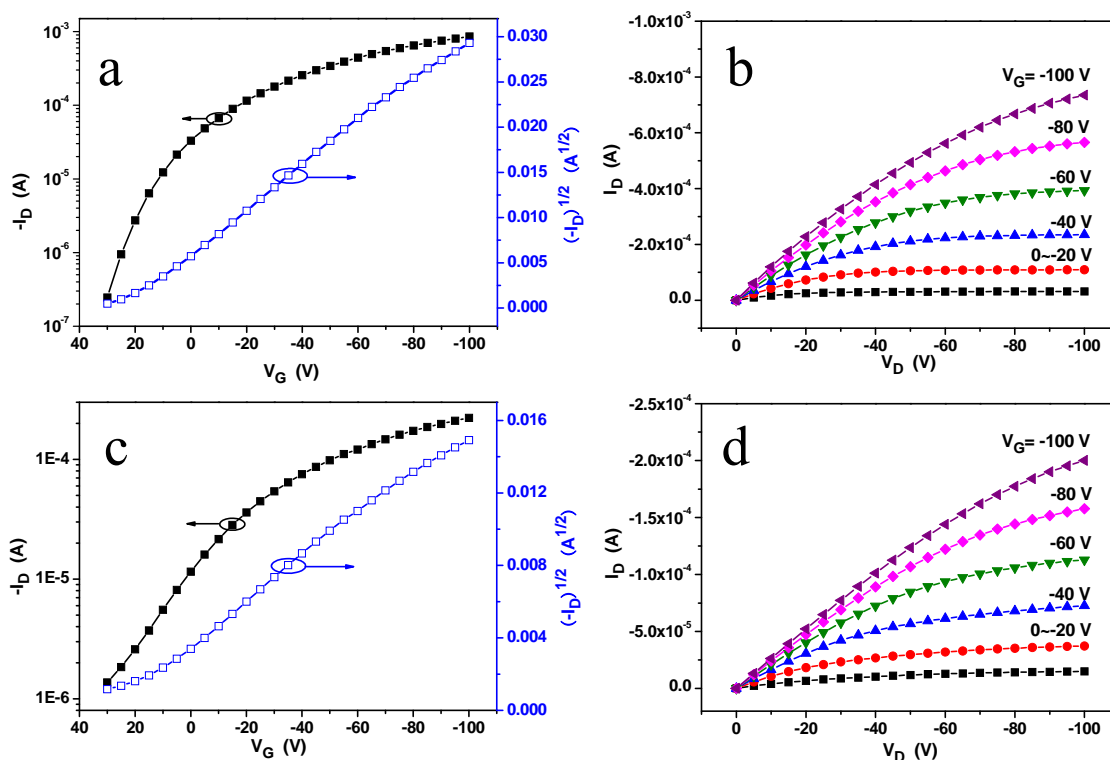

**Figure S49.** Transfer and output characteristics of devices based on **12a** (a and b, respectively) and **12b** (c and d, respectively) with OTS treated SiO<sub>2</sub>/Si ( $T_s = 60 \text{ }^\circ\text{C}$ ) substrate.

CIF Files :

data\_12a

\_audit\_creation\_method SHELXL-97  
\_chemical\_name\_systematic  
;  
?  
;  
\_chemical\_name\_common ?  
\_chemical\_melting\_point ?  
\_chemical\_formula\_moiety ?  
\_chemical\_formula\_sum  
'C34 H22 O4'  
\_chemical\_formula\_weight 494.52

loop\_

\_atom\_type\_symbol  
\_atom\_type\_description  
\_atom\_type\_scatter\_dispersion\_real  
\_atom\_type\_scatter\_dispersion\_imag  
\_atom\_type\_scatter\_source  
'C' 'C' 0.0033 0.0016  
'International Tables Vol C Tables 4.2.6.8 and 6.1.1.4'  
'H' 'H' 0.0000 0.0000  
'International Tables Vol C Tables 4.2.6.8 and 6.1.1.4'  
'O' 'O' 0.0106 0.0060  
'International Tables Vol C Tables 4.2.6.8 and 6.1.1.4'

\_symmetry\_cell\_setting 'Monoclinic'  
\_symmetry\_space\_group\_name\_H-M 'P 21/c'

loop\_

\_symmetry\_equiv\_pos\_as\_xyz  
'x, y, z'  
'-x, y+1/2, -z+1/2'  
'-x, -y, -z'  
'x, -y-1/2, z-1/2'

\_cell\_length\_a 13.091(3)  
\_cell\_length\_b 9.1718(12)  
\_cell\_length\_c 10.744(2)  
\_cell\_angle\_alpha 90.00  
\_cell\_angle\_beta 107.03(2)  
\_cell\_angle\_gamma 90.00  
\_cell\_volume 1233.5(4)  
\_cell\_formula\_units\_Z 2  
\_cell\_measurement\_temperature 293(2)  
\_cell\_measurement\_reflns\_used 2044  
\_cell\_measurement\_theta\_min 3.6558  
\_cell\_measurement\_theta\_max 33.1495

\_exptl\_crystal\_description block  
\_exptl\_crystal\_colour black  
\_exptl\_crystal\_size\_max 0.34  
\_exptl\_crystal\_size\_mid 0.32  
\_exptl\_crystal\_size\_min 0.28  
\_exptl\_crystal\_density\_meas ?  
\_exptl\_crystal\_density\_diffraction 1.331  
\_exptl\_crystal\_density\_method 'not measured'  
\_exptl\_crystal\_F\_000 516  
\_exptl\_absorption\_coefficient\_mu 0.087  
\_exptl\_absorption\_correction\_T\_min 0.9711

```
_exptl_absorpt_correction_T_max 0.9761
_exptl_absorpt_correction_type 'multi-scan'
_exptl_absorpt_process_details
;
CrysAlis RED, Oxford Diffraction Ltd.,
Version 1.171.31.7 (release 18-10-2006 CrysAlis171 .NET)
(compiled Oct 18 2006,16:28:17)
Empirical absorption correction using spherical harmonics,
implemented in SCALE3 ABSPACK scaling algorithm.
;

_diffrn_ambient_temperature 293(2)
_diffrn_radiation_wavelength 0.71073
_diffrn_radiation_type MoK $\alpha$ 
_diffrn_radiation_source 'Enhance (Mo) X-ray Source'
_diffrn_radiation_monochromator graphite
_diffrn_measurement_device_type 'OXFORD DIFFRACTION XCALIBUR-S'
_diffrn_measurement_method '\w/q-scan'
_diffrn_detector_area_resol_mean 15.9948
_diffrn_standards_number ?
_diffrn_standards_interval_count ?
_diffrn_standards_interval_time ?
_diffrn_standards_decay_% ?
_diffrn_reflns_number 8079
_diffrn_reflns_av_R_equivalents 0.0495
_diffrn_reflns_av_sigma/netl 0.0441
_diffrn_reflns_limit_h_min -15
_diffrn_reflns_limit_h_max 11
_diffrn_reflns_limit_k_min -10
_diffrn_reflns_limit_k_max 10
_diffrn_reflns_limit_l_min -12
_diffrn_reflns_limit_l_max 12
_diffrn_reflns_theta_min 3.66
_diffrn_reflns_theta_max 25.00
_reflns_number_total 2158
_reflns_number_gt 1340
_reflns_threshold_expression >2sigma(I)

_computing_data_collection 'CrysAlis CCD, Oxford Diffraction Ltd.,'
_computing_cell_refinement 'CrysAlis RED, Oxford Diffraction Ltd.,'
_computing_data_reduction 'CrysAlis RED, Oxford Diffraction Ltd.,'
_computing_structure_solution 'SHELXS-97 (Sheldrick, 1997)'
_computing_structure_refinement 'SHELXL-97 (Sheldrick, 1997)'
_computing_molecular_graphics 'Ortep3'
_computing_publication_material 'Shelx97'

_refine_special_details
;
Refinement of  $F^2$  against ALL reflections. The weighted R-factor wR and
goodness of fit S are based on  $F^2$ , conventional R-factors R are based
on F, with F set to zero for negative  $F^2$ . The threshold expression of
 $F^2 > 2\sigma(F^2)$  is used only for calculating R-factors(gt) etc. and is
not relevant to the choice of reflections for refinement. R-factors based
on  $F^2$  are statistically about twice as large as those based on F, and R-
factors based on ALL data will be even larger.
;

_refine_ls_structure_factor_coef Fsqd
_refine_ls_matrix_type full
_refine_ls_weighting_scheme calc
_refine_ls_weighting_details
'calc w=1/[ $s^2(Fo^2)+(0.0419P)^2+0.0000P$ ] where  $P=(Fo^2+2Fc^2)/3$ '
```



\_atom\_sites\_solution\_primary direct  
\_atom\_sites\_solution\_secondary difmap  
\_atom\_sites\_solution\_hydrogens geom  
\_refine\_ls\_hydrogen\_treatment constr  
\_refine\_ls\_extinction\_method none  
\_refine\_ls\_extinction\_coef ?  
\_refine\_ls\_number\_reflns 2158  
\_refine\_ls\_number\_parameters 172  
\_refine\_ls\_number\_restraints 0  
\_refine\_ls\_R\_factor\_all 0.0641  
\_refine\_ls\_R\_factor\_gt 0.0356  
\_refine\_ls\_wR\_factor\_ref 0.0781  
\_refine\_ls\_wR\_factor\_gt 0.0723  
\_refine\_ls\_goodness\_of\_fit\_ref 0.852  
\_refine\_ls\_restrained\_S\_all 0.852  
\_refine\_ls\_shift/su\_max 0.000  
\_refine\_ls\_shift/su\_mean 0.000

loop

\_atom\_site\_label  
\_atom\_site\_type\_symbol  
\_atom\_site\_fract\_x  
\_atom\_site\_fract\_y  
\_atom\_site\_fract\_z  
\_atom\_site\_U\_iso\_or\_equiv  
\_atom\_site\_adp\_type  
\_atom\_site\_occupancy  
\_atom\_site\_symmetry\_multiplicity  
\_atom\_site\_calc\_flag  
\_atom\_site\_refinement\_flags  
\_atom\_site\_disorder\_assembly  
\_atom\_site\_disorder\_group  
O1 O 0.09037(8) 0.20527(9) 0.36170(9) 0.0481(3) Uani 1 1 d ...  
O2 O 0.15311(8) -0.04427(10) 0.43687(9) 0.0494(3) Uani 1 1 d ...  
C1 C 0.03594(12) 0.33457(14) 0.35094(13) 0.0464(4) Uani 1 1 d ...  
C2 C -0.04897(12) 0.33542(15) 0.40343(13) 0.0483(4) Uani 1 1 d ...  
H2 H -0.0889 0.4200 0.3997 0.058 Uiso 1 1 calc R ..  
C3 C 0.08395(12) 0.43158(17) 0.28747(14) 0.0551(4) Uani 1 1 d ...  
H3 H 0.0634 0.5279 0.2673 0.066 Uiso 1 1 calc R ..  
C4 C 0.16742(13) 0.36160(16) 0.25903(15) 0.0548(4) Uani 1 1 d ...  
H4 H 0.2128 0.4018 0.2159 0.066 Uiso 1 1 calc R ..  
C5 C 0.17167(12) 0.22004(15) 0.30633(13) 0.0457(4) Uani 1 1 d ...  
C6 C 0.24034(12) 0.10144(15) 0.31372(13) 0.0456(4) Uani 1 1 d ...  
C7 C 0.32814(12) 0.11179(15) 0.25308(14) 0.0480(4) Uani 1 1 d ...  
C8 C 0.30834(13) 0.14103(16) 0.12205(15) 0.0565(4) Uani 1 1 d ...  
H8 H 0.2390 0.1609 0.0713 0.068 Uiso 1 1 calc R ..  
C9 C 0.39034(15) 0.14107(18) 0.06590(17) 0.0674(5) Uani 1 1 d ...  
H9 H 0.3759 0.1613 -0.0224 0.081 Uiso 1 1 calc R ..  
C10 C 0.49226(16) 0.11184(19) 0.1382(2) 0.0732(6) Uani 1 1 d ...  
H10 H 0.5468 0.1096 0.0990 0.088 Uiso 1 1 calc R ..  
C11 C 0.51459(15) 0.0857(2) 0.26905(19) 0.0796(6) Uani 1 1 d ...  
H11 H 0.5844 0.0679 0.3193 0.096 Uiso 1 1 calc R ..  
C12 C 0.43263(13) 0.0859(2) 0.32548(16) 0.0694(5) Uani 1 1 d ...  
H12 H 0.4480 0.0683 0.4143 0.083 Uiso 1 1 calc R ..  
C13 C 0.23009(12) -0.02991(15) 0.37493(13) 0.0452(4) Uani 1 1 d ...  
C14 C 0.28154(13) -0.16322(16) 0.38370(16) 0.0592(4) Uani 1 1 d ...  
H14 H 0.3379 -0.1845 0.3504 0.071 Uiso 1 1 calc R ..  
C15 C 0.23553(13) -0.25823(17) 0.44942(16) 0.0599(5) Uani 1 1 d ...  
H15 H 0.2554 -0.3548 0.4690 0.072 Uiso 1 1 calc R ..  
C16 C 0.15435(12) -0.18545(15) 0.48168(13) 0.0483(4) Uani 1 1 d ...  
C17 C 0.07457(12) -0.21311(15) 0.53929(13) 0.0484(4) Uani 1 1 d ...  
H17 H 0.0302 -0.1339 0.5390 0.058 Uiso 1 1 calc R ..

loop\_

\_atom\_site\_aniso\_label  
\_atom\_site\_aniso\_U\_11  
\_atom\_site\_aniso\_U\_22  
\_atom\_site\_aniso\_U\_33  
\_atom\_site\_aniso\_U\_23  
\_atom\_site\_aniso\_U\_13  
\_atom\_site\_aniso\_U\_12

O1 0.0512(7) 0.0355(5) 0.0594(6) 0.0055(5) 0.0190(5) 0.0057(5)  
O2 0.0559(7) 0.0372(6) 0.0587(6) 0.0072(5) 0.0224(5) 0.0099(5)  
C1 0.0510(10) 0.0330(7) 0.0502(9) 0.0041(7) 0.0071(8) 0.0079(7)  
C2 0.0537(10) 0.0362(8) 0.0523(9) 0.0056(7) 0.0112(8) 0.0107(7)  
C3 0.0602(11) 0.0401(8) 0.0624(10) 0.0109(8) 0.0138(9) 0.0059(8)  
C4 0.0572(11) 0.0493(9) 0.0569(9) 0.0103(8) 0.0155(8) -0.0012(8)  
C5 0.0466(10) 0.0459(9) 0.0431(8) 0.0028(7) 0.0111(7) 0.0001(7)  
C6 0.0448(9) 0.0466(8) 0.0436(8) 0.0000(7) 0.0098(7) 0.0010(7)  
C7 0.0458(10) 0.0466(8) 0.0504(9) -0.0017(7) 0.0120(7) -0.0004(7)  
C8 0.0520(10) 0.0631(10) 0.0535(10) 0.0051(8) 0.0140(8) -0.0030(8)  
C9 0.0705(14) 0.0747(12) 0.0610(11) 0.0027(9) 0.0254(10) -0.0099(10)  
C10 0.0650(14) 0.0770(12) 0.0884(15) -0.0142(11) 0.0395(12) -0.0167(10)  
C11 0.0460(11) 0.1065(16) 0.0839(14) -0.0066(12) 0.0153(10) 0.0010(11)  
C12 0.0523(12) 0.0951(13) 0.0577(10) 0.0020(10) 0.0111(9) 0.0059(10)  
C13 0.0437(9) 0.0470(8) 0.0456(9) -0.0003(7) 0.0140(7) 0.0052(7)  
C14 0.0566(11) 0.0522(9) 0.0740(11) 0.0054(8) 0.0274(9) 0.0147(8)  
C15 0.0623(12) 0.0441(8) 0.0759(12) 0.0077(8) 0.0241(9) 0.0157(9)  
C16 0.0547(11) 0.0368(8) 0.0517(9) 0.0056(7) 0.0128(8) 0.0090(7)  
C17 0.0523(10) 0.0396(8) 0.0531(9) 0.0028(7) 0.0149(8) 0.0102(7)

\_geom\_special\_details

;

All esds (except the esd in the dihedral angle between two l.s. planes) are estimated using the full covariance matrix. The cell esds are taken into account individually in the estimation of esds in distances, angles and torsion angles; correlations between esds in cell parameters are only used when they are defined by crystal symmetry. An approximate (isotropic) treatment of cell esds is used for estimating esds involving l.s. planes.

;

loop\_

\_geom\_bond\_atom\_site\_label\_1  
\_geom\_bond\_atom\_site\_label\_2  
\_geom\_bond\_distance  
\_geom\_bond\_site\_symmetry\_2  
\_geom\_bond\_publ\_flag

O1 C5 1.3695(16) . ?  
O1 C1 1.3709(16) . ?  
O2 C13 1.3669(16) . ?  
O2 C16 1.3799(16) . ?  
C1 C3 1.379(2) . ?  
C1 C2 1.3859(19) . ?  
C2 C17 1.3676(18) 3\_556 ?  
C2 H2 0.9300 . ?  
C3 C4 1.376(2) . ?  
C3 H3 0.9300 . ?  
C4 C5 1.3895(19) . ?  
C4 H4 0.9300 . ?  
C5 C6 1.3986(19) . ?  
C6 C13 1.3976(18) . ?  
C6 C7 1.481(2) . ?  
C7 C8 1.381(2) . ?  
C7 C12 1.382(2) . ?

C8 C9 1.377(2) . ?  
C8 H8 0.9300 . ?  
C9 C10 1.360(2) . ?  
C9 H9 0.9300 . ?  
C10 C11 1.370(2) . ?  
C10 H10 0.9300 . ?  
C11 C12 1.378(2) . ?  
C11 H11 0.9300 . ?  
C12 H12 0.9300 . ?  
C13 C14 1.3858(19) . ?  
C14 C15 1.367(2) . ?  
C14 H14 0.9300 . ?  
C15 C16 1.382(2) . ?  
C15 H15 0.9300 . ?  
C16 C17 1.3846(19) . ?  
C17 C2 1.3676(18) 3\_556 ?  
C17 H17 0.9300 . ?

loop\_

\_geom\_angle\_atom\_site\_label\_1  
\_geom\_angle\_atom\_site\_label\_2  
\_geom\_angle\_atom\_site\_label\_3  
\_geom\_angle  
\_geom\_angle\_site\_symmetry\_1  
\_geom\_angle\_site\_symmetry\_3  
\_geom\_angle\_publ\_flag  
C5 O1 C1 109.19(10) . . ?  
C13 O2 C16 108.98(10) . . ?  
O1 C1 C3 107.38(13) . . ?  
O1 C1 C2 115.44(12) . . ?  
C3 C1 C2 137.17(13) . . ?  
C17 C2 C1 120.66(13) 3\_556 . ?  
C17 C2 H2 119.7 3\_556 . ?  
C1 C2 H2 119.7 . . ?  
C4 C3 C1 108.38(13) . . ?  
C4 C3 H3 125.8 . . ?  
C1 C3 H3 125.8 . . ?  
C3 C4 C5 107.69(14) . . ?  
C3 C4 H4 126.2 . . ?  
C5 C4 H4 126.2 . . ?  
O1 C5 C4 107.36(13) . . ?  
O1 C5 C6 117.82(12) . . ?  
C4 C5 C6 134.74(15) . . ?  
C13 C6 C5 123.26(13) . . ?  
C13 C6 C7 117.14(12) . . ?  
C5 C6 C7 119.60(13) . . ?  
C8 C7 C12 117.81(15) . . ?  
C8 C7 C6 121.51(14) . . ?  
C12 C7 C6 120.61(14) . . ?  
C9 C8 C7 120.59(16) . . ?  
C9 C8 H8 119.7 . . ?  
C7 C8 H8 119.7 . . ?  
C10 C9 C8 120.67(17) . . ?  
C10 C9 H9 119.7 . . ?  
C8 C9 H9 119.7 . . ?  
C9 C10 C11 119.98(17) . . ?  
C9 C10 H10 120.0 . . ?  
C11 C10 H10 120.0 . . ?  
C10 C11 C12 119.42(18) . . ?  
C10 C11 H11 120.3 . . ?  
C12 C11 H11 120.3 . . ?  
C11 C12 C7 121.49(16) . . ?

C11 C12 H12 119.3 . . ?  
C7 C12 H12 119.3 . . ?  
O2 C13 C14 107.15(13) . . ?  
O2 C13 C6 119.88(12) . . ?  
C14 C13 C6 132.90(14) . . ?  
C15 C14 C13 108.58(14) . . ?  
C15 C14 H14 125.7 . . ?  
C13 C14 H14 125.7 . . ?  
C14 C15 C16 108.00(13) . . ?  
C14 C15 H15 126.0 . . ?  
C16 C15 H15 126.0 . . ?  
O2 C16 C15 107.28(12) . . ?  
O2 C16 C17 113.24(12) . . ?  
C15 C16 C17 139.43(14) . . ?  
C2 C17 C16 131.90(14) 3\_556 . ?  
C2 C17 H17 114.0 3\_556 . ?  
C16 C17 H17 114.0 . . ?

loop\_

\_geom\_torsion\_atom\_site\_label\_1  
\_geom\_torsion\_atom\_site\_label\_2  
\_geom\_torsion\_atom\_site\_label\_3  
\_geom\_torsion\_atom\_site\_label\_4  
\_geom\_torsion  
\_geom\_torsion\_site\_symmetry\_1  
\_geom\_torsion\_site\_symmetry\_2  
\_geom\_torsion\_site\_symmetry\_3  
\_geom\_torsion\_site\_symmetry\_4  
\_geom\_torsion\_publ\_flag  
C5 O1 C1 C3 0.15(15) . . . . ?  
C5 O1 C1 C2 -179.91(12) . . . . ?  
O1 C1 C2 C17 -0.3(2) . . . 3\_556 ?  
C3 C1 C2 C17 179.61(17) . . . 3\_556 ?  
O1 C1 C3 C4 0.20(16) . . . . ?  
C2 C1 C3 C4 -179.72(17) . . . . ?  
C1 C3 C4 C5 -0.46(17) . . . . ?  
C1 O1 C5 C4 -0.43(15) . . . . ?  
C1 O1 C5 C6 176.67(12) . . . . ?  
C3 C4 C5 O1 0.55(16) . . . . ?  
C3 C4 C5 C6 -175.84(16) . . . . ?  
O1 C5 C6 C13 -0.3(2) . . . . ?  
C4 C5 C6 C13 175.84(15) . . . . ?  
O1 C5 C6 C7 178.91(12) . . . . ?  
C4 C5 C6 C7 -5.0(2) . . . . ?  
C13 C6 C7 C8 121.23(15) . . . . ?  
C5 C6 C7 C8 -58.00(19) . . . . ?  
C13 C6 C7 C12 -55.9(2) . . . . ?  
C5 C6 C7 C12 124.88(16) . . . . ?  
C12 C7 C8 C9 1.3(2) . . . . ?  
C6 C7 C8 C9 -175.86(14) . . . . ?  
C7 C8 C9 C10 0.2(2) . . . . ?  
C8 C9 C10 C11 -1.7(3) . . . . ?  
C9 C10 C11 C12 1.5(3) . . . . ?  
C10 C11 C12 C7 0.1(3) . . . . ?  
C8 C7 C12 C11 -1.5(3) . . . . ?  
C6 C7 C12 C11 175.73(16) . . . . ?  
C16 O2 C13 C14 -1.27(15) . . . . ?  
C16 O2 C13 C6 176.07(12) . . . . ?  
C5 C6 C13 O2 -3.2(2) . . . . ?  
C7 C6 C13 O2 177.57(12) . . . . ?  
C5 C6 C13 C14 173.29(16) . . . . ?  
C7 C6 C13 C14 -5.9(2) . . . . ?

O2 C13 C14 C15 0.54(18) . . . . ?  
C6 C13 C14 C15 -176.30(16) . . . . ?  
C13 C14 C15 C16 0.38(19) . . . . ?  
C13 O2 C16 C15 1.50(16) . . . . ?  
C13 O2 C16 C17 -176.36(12) . . . . ?  
C14 C15 C16 O2 -1.15(18) . . . . ?  
C14 C15 C16 C17 175.84(18) . . . . ?  
O2 C16 C17 C2 -179.02(14) . . . 3\_556 ?  
C15 C16 C17 C2 4.1(3) . . . 3\_556 ?

\_diffn\_measured\_fraction\_theta\_max 0.998  
\_diffn\_reflns\_theta\_full 25.00  
\_diffn\_measured\_fraction\_theta\_full 0.998  
\_refine\_diff\_density\_max 0.100  
\_refine\_diff\_density\_min -0.149  
\_refine\_diff\_density\_rms 0.032

CIF Files :

data\_12b

\_audit\_creation\_method SHELXL-97  
\_chemical\_name\_systematic  
;  
?  
;  
\_chemical\_name\_common ?  
\_chemical\_melting\_point ?  
\_chemical\_formula\_moiety ?  
\_chemical\_formula\_sum  
'C36 H26 O4'  
\_chemical\_formula\_weight 522.57

loop\_

\_atom\_type\_symbol  
\_atom\_type\_description  
\_atom\_type\_scatter\_dispersion\_real  
\_atom\_type\_scatter\_dispersion\_imag  
\_atom\_type\_scatter\_source  
'C' 'C' 0.0033 0.0016  
'International Tables Vol C Tables 4.2.6.8 and 6.1.1.4'  
'H' 'H' 0.0000 0.0000  
'International Tables Vol C Tables 4.2.6.8 and 6.1.1.4'  
'O' 'O' 0.0106 0.0060  
'International Tables Vol C Tables 4.2.6.8 and 6.1.1.4'

\_symmetry\_cell\_setting 'Orthorhombic'  
\_symmetry\_space\_group\_name\_H-M 'P b c a'

loop\_

\_symmetry\_equiv\_pos\_as\_xyz  
'x, y, z'  
'-x+1/2, -y, z+1/2'  
'x+1/2, -y+1/2, -z'  
'-x, y+1/2, -z+1/2'  
'-x, -y, -z'  
'x-1/2, y, -z-1/2'  
'-x-1/2, y-1/2, z'  
'x, -y-1/2, z-1/2'

\_cell\_length\_a 34.541(2)  
\_cell\_length\_b 9.5379(7)  
\_cell\_length\_c 7.8246(6)  
\_cell\_angle\_alpha 90.00  
\_cell\_angle\_beta 90.00  
\_cell\_angle\_gamma 90.00  
\_cell\_volume 2577.8(3)  
\_cell\_formula\_units\_Z 4  
\_cell\_measurement\_temperature 293(2)  
\_cell\_measurement\_reflns\_used 2737  
\_cell\_measurement\_theta\_min 3.3609  
\_cell\_measurement\_theta\_max 32.7152

\_exptl\_crystal\_description plate  
\_exptl\_crystal\_colour black  
\_exptl\_crystal\_size\_max 0.21  
\_exptl\_crystal\_size\_mid 0.17  
\_exptl\_crystal\_size\_min 0.13  
\_exptl\_crystal\_density\_meas ?  
\_exptl\_crystal\_density\_diffn 1.347

```
_exptl_crystal_density_method  'not measured'
_exptl_crystal_F_000          1096
_exptl_absorpt_coefficient_mu  0.087
_exptl_absorpt_correction_T_min 0.9820
_exptl_absorpt_correction_T_max 0.9888
_exptl_absorpt_correction_type  'multi-scan'
_exptl_absorpt_process_details
;
CrysAlis RED, Oxford Diffraction Ltd.,
Version 1.171.31.7 (release 18-10-2006 CrysAlis171 .NET)
(compiled Oct 18 2006,16:28:17)
Empirical absorption correction using spherical harmonics,
implemented in SCALE3 ABSPACK scaling algorithm.
;

_diffrn_ambient_temperature    293(2)
_diffrn_radiation_wavelength   0.71073
_diffrn_radiation_type         MoK $\alpha$ 
_diffrn_radiation_source       'Enhance (Mo) X-ray Source'
_diffrn_radiation_monochromator graphite
_diffrn_measurement_device_type 'OXFORD DIFFRACTION XCALIBUR-S'
_diffrn_measurement_method     '\w/q-scan'
_diffrn_detector_area_resol_mean 15.9948
_diffrn_standards_number       ?
_diffrn_standards_interval_count ?
_diffrn_standards_interval_time ?
_diffrn_standards_decay_%      ?
_diffrn_reflns_number          17815
_diffrn_reflns_av_R_equivalents 0.0975
_diffrn_reflns_av_sigmaI/netI  0.0929
_diffrn_reflns_limit_h_min     -41
_diffrn_reflns_limit_h_max     41
_diffrn_reflns_limit_k_min     -10
_diffrn_reflns_limit_k_max     11
_diffrn_reflns_limit_l_min     -9
_diffrn_reflns_limit_l_max     9
_diffrn_reflns_theta_min       3.42
_diffrn_reflns_theta_max       25.00
_reflns_number_total           2270
_reflns_number_gt              1088
_reflns_threshold_expression    >2sigma(I)

_computing_data_collection      'CrysAlis CCD, Oxford Diffraction Ltd.,'
_computing_cell_refinement      'CrysAlis RED, Oxford Diffraction Ltd.,'
_computing_data_reduction       'CrysAlis RED, Oxford Diffraction Ltd.,'
_computing_structure_solution   'SHELXS-97 (Sheldrick, 1997)'
_computing_structure_refinement 'SHELXL-97 (Sheldrick, 1997)'
_computing_molecular_graphics   'Ortep3'
_computing_publication_material 'Shelx97'

_refine_special_details
;
Refinement of  $F^2$  against ALL reflections. The weighted R-factor wR and
goodness of fit S are based on  $F^2$ , conventional R-factors R are based
on F, with F set to zero for negative  $F^2$ . The threshold expression of
 $F^2 > 2\sigma(F^2)$  is used only for calculating R-factors(gt) etc. and is
not relevant to the choice of reflections for refinement. R-factors based
on  $F^2$  are statistically about twice as large as those based on F, and R-
factors based on ALL data will be even larger.
;
```

```
_refine_ls_structure_factor_coef Fsqd
_refine_ls_matrix_type full
_refine_ls_weighting_scheme calc
_refine_ls_weighting_details
'calc w=1/[s^2*(Fo^2)+(0.0337P)^2+0.0000P] where P=(Fo^2+2Fc^2)/3'
_atom_sites_solution_primary direct
_atom_sites_solution_secondary difmap
_atom_sites_solution_hydrogens geom
_refine_ls_hydrogen_treatment riding
_refine_ls_extinction_method none
_refine_ls_extinction_coef ?
_refine_ls_number_reflns 2270
_refine_ls_number_parameters 182
_refine_ls_number_restraints 0
_refine_ls_R_factor_all 0.1091
_refine_ls_R_factor_gt 0.0418
_refine_ls_wR_factor_ref 0.0872
_refine_ls_wR_factor_gt 0.0776
_refine_ls_goodness_of_fit_ref 0.813
_refine_ls_restrained_S_all 0.813
_refine_ls_shift/su_max 0.000
_refine_ls_shift/su_mean 0.000
```

loop\_

```
_atom_site_label
_atom_site_type_symbol
_atom_site_fract_x
_atom_site_fract_y
_atom_site_fract_z
_atom_site_U_iso_or_equiv
_atom_site_adp_type
_atom_site_occupancy
_atom_site_symmetry_multiplicity
_atom_site_calc_flag
_atom_site_refinement_flags
_atom_site_disorder_assembly
_atom_site_disorder_group
O1 O 0.55805(5) 1.19579(16) 0.60512(19) 0.0472(4) Uani 1 1 d ...
O2 O 0.56452(4) 0.93715(16) 0.56863(19) 0.0452(4) Uani 1 1 d ...
C1 C 0.54105(7) 1.3250(3) 0.6311(3) 0.0425(6) Uani 1 1 d ...
C2 C 0.56909(8) 1.4146(3) 0.6917(3) 0.0488(7) Uani 1 1 d ...
H2 H 0.5655 1.5084 0.7203 0.059 Uiso 1 1 calc R ..
C3 C 0.60330(8) 1.3413(3) 0.7026(3) 0.0481(7) Uani 1 1 d ...
H3 H 0.6269 1.3773 0.7392 0.058 Uiso 1 1 calc R ..
C4 C 0.59657(7) 1.2043(3) 0.6498(3) 0.0417(6) Uani 1 1 d ...
C5 C 0.61897(7) 1.0840(3) 0.6348(3) 0.0392(6) Uani 1 1 d ...
C6 C 0.60398(7) 0.9531(3) 0.5831(3) 0.0401(6) Uani 1 1 d ...
C7 C 0.62073(7) 0.8280(3) 0.5285(3) 0.0468(7) Uani 1 1 d ...
H7 H 0.6471 0.8082 0.5262 0.056 Uiso 1 1 calc R ..
C8 C 0.59161(8) 0.7389(3) 0.4786(3) 0.0474(7) Uani 1 1 d ...
H8 H 0.5949 0.6487 0.4359 0.057 Uiso 1 1 calc R ..
C9 C 0.55670(7) 0.8053(2) 0.5024(3) 0.0403(6) Uani 1 1 d ...
C10 C 0.51764(7) 0.7842(2) 0.4691(3) 0.0430(6) Uani 1 1 d ...
H10 H 0.5017 0.8598 0.4958 0.052 Uiso 1 1 calc R ..
C11 C 0.49879(7) 0.6704(3) 0.4034(3) 0.0453(7) Uani 1 1 d ...
H11 H 0.5126 0.5887 0.3812 0.054 Uiso 1 1 calc R ..
C12 C 0.66108(7) 1.0917(2) 0.6696(3) 0.0396(6) Uani 1 1 d ...
C13 C 0.68432(7) 1.1960(3) 0.5995(3) 0.0440(7) Uani 1 1 d ...
H13 H 0.6733 1.2637 0.5291 0.053 Uiso 1 1 calc R ..
C14 C 0.72361(7) 1.2002(3) 0.6331(3) 0.0450(7) Uani 1 1 d ...
H14 H 0.7384 1.2720 0.5861 0.054 Uiso 1 1 calc R ..
C15 C 0.74151(7) 1.1012(3) 0.7345(3) 0.0444(7) Uani 1 1 d ...
```



C16 C 0.78453(7) 1.1033(3) 0.7683(3) 0.0606(8) Uani 1 1 d . . .  
H16A H 0.7960 1.1817 0.7103 0.091 Uiso 1 1 calc R . .  
H16B H 0.7959 1.0179 0.7271 0.091 Uiso 1 1 calc R . .  
H16C H 0.7890 1.1116 0.8890 0.091 Uiso 1 1 calc R . .  
C17 C 0.71837(7) 0.9986(3) 0.8052(3) 0.0475(7) Uani 1 1 d . . .  
H17 H 0.7295 0.9307 0.8750 0.057 Uiso 1 1 calc R . .  
C18 C 0.67905(7) 0.9945(3) 0.7746(3) 0.0481(7) Uani 1 1 d . . .  
H18 H 0.6642 0.9247 0.8257 0.058 Uiso 1 1 calc R . .

loop\_

\_atom\_site\_aniso\_label  
\_atom\_site\_aniso\_U\_11  
\_atom\_site\_aniso\_U\_22  
\_atom\_site\_aniso\_U\_33  
\_atom\_site\_aniso\_U\_23  
\_atom\_site\_aniso\_U\_13  
\_atom\_site\_aniso\_U\_12

O1 0.0391(11) 0.0381(10) 0.0643(11) -0.0070(9) -0.0056(9) 0.0020(9)  
O2 0.0355(11) 0.0410(11) 0.0593(11) -0.0025(8) -0.0017(8) -0.0006(8)  
C1 0.0440(17) 0.0349(16) 0.0486(15) -0.0047(12) 0.0015(13) -0.0012(14)  
C2 0.0550(19) 0.0391(16) 0.0522(16) -0.0062(13) -0.0007(14) -0.0034(15)  
C3 0.0434(17) 0.0485(18) 0.0524(16) -0.0070(13) -0.0020(13) -0.0064(14)  
C4 0.0328(16) 0.0448(17) 0.0474(16) 0.0022(14) -0.0049(12) -0.0004(14)  
C5 0.0355(16) 0.0427(17) 0.0395(15) 0.0023(12) -0.0018(12) -0.0022(14)  
C6 0.0318(16) 0.0432(17) 0.0454(15) 0.0043(13) 0.0010(12) 0.0019(13)  
C7 0.0358(15) 0.0517(18) 0.0528(16) -0.0041(13) 0.0020(13) 0.0027(14)  
C8 0.0497(19) 0.0401(16) 0.0524(17) -0.0066(13) 0.0064(14) 0.0039(14)  
C9 0.0393(16) 0.0329(15) 0.0487(15) -0.0012(13) 0.0038(12) -0.0030(13)  
C10 0.0415(17) 0.0372(16) 0.0502(16) -0.0043(13) 0.0038(13) 0.0019(12)  
C11 0.0456(17) 0.0354(16) 0.0549(16) 0.0003(13) 0.0040(13) 0.0029(14)  
C12 0.0381(16) 0.0426(17) 0.0380(15) -0.0009(12) 0.0005(12) 0.0011(13)  
C13 0.0424(17) 0.0479(17) 0.0417(15) 0.0033(13) -0.0024(12) 0.0007(14)  
C14 0.0387(17) 0.0465(17) 0.0499(16) 0.0019(13) 0.0031(12) -0.0059(14)  
C15 0.0370(17) 0.0469(18) 0.0491(17) -0.0070(13) -0.0024(13) -0.0024(14)  
C16 0.0412(18) 0.068(2) 0.073(2) -0.0073(15) -0.0065(14) -0.0018(14)  
C17 0.0429(18) 0.0516(18) 0.0480(15) 0.0055(14) -0.0079(13) 0.0028(14)  
C18 0.0427(18) 0.0507(17) 0.0509(16) 0.0077(14) -0.0011(13) -0.0024(14)

\_geom\_special\_details

;

All esds (except the esd in the dihedral angle between two l.s. planes) are estimated using the full covariance matrix. The cell esds are taken into account individually in the estimation of esds in distances, angles and torsion angles; correlations between esds in cell parameters are only used when they are defined by crystal symmetry. An approximate (isotropic) treatment of cell esds is used for estimating esds involving l.s. planes.

;

loop\_

\_geom\_bond\_atom\_site\_label\_1  
\_geom\_bond\_atom\_site\_label\_2  
\_geom\_bond\_distance  
\_geom\_bond\_site\_symmetry\_2  
\_geom\_bond\_publ\_flag

O1 C4 1.378(3) . ?  
O1 C1 1.380(3) . ?  
O2 C6 1.376(2) . ?  
O2 C9 1.387(2) . ?  
C1 C2 1.376(3) . ?  
C1 C11 1.403(3) 5\_676 ?  
C2 C3 1.376(3) . ?  
C2 H2 0.9300 . ?

C3 C4 1.390(3) . ?  
C3 H3 0.9300 . ?  
C4 C5 1.389(3) . ?  
C5 C6 1.411(3) . ?  
C5 C12 1.482(3) . ?  
C6 C7 1.393(3) . ?  
C7 C8 1.373(3) . ?  
C7 H7 0.9300 . ?  
C8 C9 1.375(3) . ?  
C8 H8 0.9300 . ?  
C9 C10 1.389(3) . ?  
C10 C11 1.366(3) . ?  
C10 H10 0.9300 . ?  
C11 C1 1.403(3) 5\_676 ?  
C11 H11 0.9300 . ?  
C12 C18 1.386(3) . ?  
C12 C13 1.391(3) . ?  
C13 C14 1.383(3) . ?  
C13 H13 0.9300 . ?  
C14 C15 1.380(3) . ?  
C14 H14 0.9300 . ?  
C15 C17 1.379(3) . ?  
C15 C16 1.509(3) . ?  
C16 H16A 0.9600 . ?  
C16 H16B 0.9600 . ?  
C16 H16C 0.9600 . ?  
C17 C18 1.379(3) . ?  
C17 H17 0.9300 . ?  
C18 H18 0.9300 . ?

loop\_

\_geom\_angle\_atom\_site\_label\_1  
\_geom\_angle\_atom\_site\_label\_2  
\_geom\_angle\_atom\_site\_label\_3  
\_geom\_angle  
\_geom\_angle\_site\_symmetry\_1  
\_geom\_angle\_site\_symmetry\_3  
\_geom\_angle\_publ\_flag  
C4 O1 C1 108.70(19) . . ?  
C6 O2 C9 108.90(18) . . ?  
C2 C1 O1 107.8(2) . . ?  
C2 C1 C11 137.5(3) . 5\_676 ?  
O1 C1 C11 114.6(2) . 5\_676 ?  
C1 C2 C3 108.1(2) . . ?  
C1 C2 H2 126.0 . . ?  
C3 C2 H2 126.0 . . ?  
C2 C3 C4 108.4(2) . . ?  
C2 C3 H3 125.8 . . ?  
C4 C3 H3 125.8 . . ?  
O1 C4 C5 117.9(2) . . ?  
O1 C4 C3 107.0(2) . . ?  
C5 C4 C3 135.1(2) . . ?  
C4 C5 C6 123.4(2) . . ?  
C4 C5 C12 119.4(2) . . ?  
C6 C5 C12 117.2(2) . . ?  
O2 C6 C7 106.9(2) . . ?  
O2 C6 C5 119.0(2) . . ?  
C7 C6 C5 133.9(2) . . ?  
C8 C7 C6 108.2(2) . . ?  
C8 C7 H7 125.9 . . ?  
C6 C7 H7 125.9 . . ?  
C7 C8 C9 108.6(2) . . ?

C7 C8 H8 125.7 . . ?  
C9 C8 H8 125.7 . . ?  
C8 C9 O2 107.3(2) . . ?  
C8 C9 C10 139.5(2) . . ?  
O2 C9 C10 113.0(2) . . ?  
C11 C10 C9 130.5(2) . . ?  
C11 C10 H10 114.8 . . ?  
C9 C10 H10 114.8 . . ?  
C10 C11 C1 121.0(2) . 5\_676 ?  
C10 C11 H11 119.5 . . ?  
C1 C11 H11 119.5 5\_676 . ?  
C18 C12 C13 117.0(2) . . ?  
C18 C12 C5 121.0(2) . . ?  
C13 C12 C5 122.0(2) . . ?  
C14 C13 C12 120.8(2) . . ?  
C14 C13 H13 119.6 . . ?  
C12 C13 H13 119.6 . . ?  
C15 C14 C13 121.9(2) . . ?  
C15 C14 H14 119.0 . . ?  
C13 C14 H14 119.0 . . ?  
C17 C15 C14 117.2(2) . . ?  
C17 C15 C16 120.6(2) . . ?  
C14 C15 C16 122.2(2) . . ?  
C15 C16 H16A 109.5 . . ?  
C15 C16 H16B 109.5 . . ?  
H16A C16 H16B 109.5 . . ?  
C15 C16 H16C 109.5 . . ?  
H16A C16 H16C 109.5 . . ?  
H16B C16 H16C 109.5 . . ?  
C15 C17 C18 121.4(2) . . ?  
C15 C17 H17 119.3 . . ?  
C18 C17 H17 119.3 . . ?  
C17 C18 C12 121.6(2) . . ?  
C17 C18 H18 119.2 . . ?  
C12 C18 H18 119.2 . . ?

loop\_

\_geom\_torsion\_atom\_site\_label\_1  
\_geom\_torsion\_atom\_site\_label\_2  
\_geom\_torsion\_atom\_site\_label\_3  
\_geom\_torsion\_atom\_site\_label\_4  
\_geom\_torsion  
\_geom\_torsion\_site\_symmetry\_1  
\_geom\_torsion\_site\_symmetry\_2  
\_geom\_torsion\_site\_symmetry\_3  
\_geom\_torsion\_site\_symmetry\_4  
\_geom\_torsion\_publ\_flag  
C4 O1 C1 C2 0.2(2) . . . . ?  
C4 O1 C1 C11 -177.6(2) . . . 5\_676 ?  
O1 C1 C2 C3 0.2(3) . . . . ?  
C11 C1 C2 C3 177.3(3) 5\_676 . . . ?  
C1 C2 C3 C4 -0.5(3) . . . . ?  
C1 O1 C4 C5 179.32(19) . . . . ?  
C1 O1 C4 C3 -0.5(2) . . . . ?  
C2 C3 C4 O1 0.6(3) . . . . ?  
C2 C3 C4 C5 -179.1(2) . . . . ?  
O1 C4 C5 C6 -2.7(3) . . . . ?  
C3 C4 C5 C6 177.1(3) . . . . ?  
O1 C4 C5 C12 175.59(19) . . . . ?  
C3 C4 C5 C12 -4.7(4) . . . . ?  
C9 O2 C6 C7 -1.3(3) . . . . ?  
C9 O2 C6 C5 174.87(19) . . . . ?

C4 C5 C6 O2 -9.2(3) . . . . ?  
C12 C5 C6 O2 172.5(2) . . . . ?  
C4 C5 C6 C7 165.8(2) . . . . ?  
C12 C5 C6 C7 -12.5(4) . . . . ?  
O2 C6 C7 C8 1.2(3) . . . . ?  
C5 C6 C7 C8 -174.2(2) . . . . ?  
C6 C7 C8 C9 -0.6(3) . . . . ?  
C7 C8 C9 O2 -0.2(3) . . . . ?  
C7 C8 C9 C10 173.6(3) . . . . ?  
C6 O2 C9 C8 1.0(2) . . . . ?  
C6 O2 C9 C10 -174.66(18) . . . . ?  
C8 C9 C10 C11 5.9(5) . . . . ?  
O2 C9 C10 C11 179.5(2) . . . . ?  
C9 C10 C11 C1 -175.5(2) . . . . 5\_676 ?  
C4 C5 C12 C18 132.0(2) . . . . ?  
C6 C5 C12 C18 -49.6(3) . . . . ?  
C4 C5 C12 C13 -47.9(3) . . . . ?  
C6 C5 C12 C13 130.4(2) . . . . ?  
C18 C12 C13 C14 0.5(3) . . . . ?  
C5 C12 C13 C14 -179.6(2) . . . . ?  
C12 C13 C14 C15 1.0(4) . . . . ?  
C13 C14 C15 C17 -1.5(3) . . . . ?  
C13 C14 C15 C16 178.5(2) . . . . ?  
C14 C15 C17 C18 0.6(4) . . . . ?  
C16 C15 C17 C18 -179.5(2) . . . . ?  
C15 C17 C18 C12 1.0(4) . . . . ?  
C13 C12 C18 C17 -1.5(4) . . . . ?  
C5 C12 C18 C17 178.6(2) . . . . ?

\_diffn\_measured\_fraction\_theta\_max 0.998  
\_diffn\_reflns\_theta\_full 25.00  
\_diffn\_measured\_fraction\_theta\_full 0.998  
\_refine\_diff\_density\_max 0.149  
\_refine\_diff\_density\_min -0.122  
\_refine\_diff\_density\_rms 0.032
